# Supplementary material
Source: PubMed Central journal article supplement (PMC6346293)
Supplement: ofy353_suppl_supplementary_material.pdf [file ofy353_suppl_supplementary_material.pdf]

1  
2  
3  
4  
5  
6  
7

**Supplementary materials for**

***Cost-effectiveness of screening and treatment or vaccination of hepatitis B in six high-risk populations in the US***

***November 12, 2018***

## 8 Technical Supplement – Detailed Methods and Additional Results

|    |                                                                                                              |    |
|----|--------------------------------------------------------------------------------------------------------------|----|
| 9  | Technical Supplement – Detailed Methods and Additional Results .....                                         | 2  |
| 10 | List of Figures.....                                                                                         | 3  |
| 11 | List of Tables .....                                                                                         | 3  |
| 12 | I. Modelling.....                                                                                            | 5  |
| 13 | 1. Model assumptions .....                                                                                   | 5  |
| 14 | 2. Markov structure.....                                                                                     | 8  |
| 15 | 3. Model structure – simplified graphics.....                                                                | 11 |
| 16 | II. Model Inputs .....                                                                                       | 15 |
| 17 | 1. Distribution of patients entering the model .....                                                         | 15 |
| 18 | 2. Transition probabilities for acute and chronic hepatitis B Markov health states: natural history and with |    |
| 19 | treatment .....                                                                                              | 16 |
| 20 | 3. Screening and linkage to care inputs.....                                                                 | 18 |
| 21 | 4. Transition probabilities and risk reduction with chronic hepatitis B treatment .....                      | 26 |
| 22 | 5. Transmission probabilities.....                                                                           | 32 |
| 23 | 6. Prevention .....                                                                                          | 32 |
| 24 | 7. Health related quality of life: Natural history and treatment .....                                       | 33 |
| 25 | 8. Utility loss with anti-viral treatment .....                                                              | 33 |
| 26 | 9. Cost Inputs.....                                                                                          | 34 |
| 27 | 10. Sensitivity analyses methods.....                                                                        | 38 |
| 28 | III. Model Calibration and Validation.....                                                                   | 39 |
| 29 | 1. Calibration and Validation of Natural History Model.....                                                  | 39 |
| 30 | 2. Validation of Treatment Model.....                                                                        | 44 |
| 31 | IV. Additional Base-Case Results .....                                                                       | 47 |
| 32 | 1. Results by strategy and program for each study population .....                                           | 47 |
| 33 | 2. Results by comparative broad strategies for each study population.....                                    | 52 |
| 34 | V. Scenario Analysis .....                                                                                   | 54 |
| 35 | 1. Improved screening and linkage to care – ICER Calculations.....                                           | 54 |
| 36 | 2. Improved screening and linkage to care - Clinical Outcomes .....                                          | 57 |
| 37 | VI. Additional One-Way Analyses .....                                                                        | 59 |
| 38 | 1. Tornado Analyses: .....                                                                                   | 59 |
| 39 | 2. Effect of uncertainty around population-specific prevalence and incidence rates on ICER .....             | 66 |
| 40 | VII. References .....                                                                                        | 67 |

## 42 List of Figures

|    |                                                                                                                               |    |
|----|-------------------------------------------------------------------------------------------------------------------------------|----|
| 43 | FIGURE S1: MARKOV STATE DIAGRAM OF NATURAL HISTORY OF ACUTE AND CHRONIC HEPATITIS B .....                                     | 9  |
| 44 | FIGURE S2: SIMPLIFIED TREATMENT MODEL TREE STRUCTURE.....                                                                     | 11 |
| 45 | FIGURE S3: SIMPLIFIED SCREEN AND TREAT (TREATMENT ONLY) MODEL TREE STRUCTURE .....                                            | 12 |
| 46 | FIGURE S4: SIMPLIFIED SCREEN AND VACCINATE (VACCINATION ONLY) MODEL TREE STRUCTURE.....                                       | 13 |
| 47 | FIGURE S5: SIMPLIFIED SCREEN AND TREAT OR VACCINATE (INCLUSIVE) MODEL TREE STRUCTURE.....                                     | 14 |
| 48 | FIGURE S6: PERCENT OF PATIENTS TRANSITIONING FROM IMMUNE TOLERANT PHASE TO CHRONIC HEPATITIS B .....                          | 40 |
| 49 | FIGURE S7: CUMULATIVE PROBABILITIES OF CIRRHOSIS AND HCC IN THE NATURAL HISTORY MODEL AND EPIDEMIOLOGY DATA.....              | 42 |
| 50 | FIGURE S8: CUMULATIVE PROBABILITIES GRAPHS FROM REVEAL-HBV STUDY.....                                                         | 43 |
| 51 | FIGURE S9: PERCENT REDUCTION OF KEY CLINICAL OUTCOMES OF CHRONIC HEPATITIS B WITH TREATMENT .....                             | 46 |
| 52 | FIGURE S10: SHORT-TERM AND INTERMEDIATE CLINICAL OUTCOMES FOR EACH POPULATION IN SCENARIO ANALYSIS.....                       | 57 |
| 53 | FIGURE S11: LONG-TERM CLINICAL OUTCOMES FOR EACH POPULATION IN SCENARIO ANALYSIS .....                                        | 58 |
| 54 | FIGURE S12: SENSITIVITY ANALYSIS FOR THE INCLUSIVE STRATEGY COMPARED TO NO INTERVENTION FOR ASIAN AND PACIFIC ISLANDERS.....  | 60 |
| 55 | FIGURE S13: SENSITIVITY ANALYSIS FOR THE INCLUSIVE STRATEGY COMPARED TO NO INTERVENTION FOR AFRICA BORN BLACK POPULATION..... | 61 |
| 56 | FIGURE S14: SENSITIVITY ANALYSIS FOR THE INCLUSIVE STRATEGY COMPARED TO NO INTERVENTION FOR INCARCERATED INDIVIDUALS .....    | 62 |
| 57 | FIGURE S15: SENSITIVITY ANALYSIS FOR THE INCLUSIVE STRATEGY COMPARED TO NO INTERVENTION FOR REFUGEES .....                    | 63 |
| 58 | FIGURE S16: SENSITIVITY ANALYSIS FOR THE INCLUSIVE STRATEGY COMPARED TO NO INTERVENTION FOR PEOPLE WHO INJECT DRUGS .....     | 64 |
| 59 | FIGURE S17: SENSITIVITY ANALYSIS FOR THE INCLUSIVE STRATEGY COMPARED TO NO INTERVENTION FOR MEN WHO SEX WITH MEN .....        | 65 |
| 60 |                                                                                                                               |    |

## 61 List of Tables

|    |                                                                                                                                    |    |
|----|------------------------------------------------------------------------------------------------------------------------------------|----|
| 62 | TABLE S1: DISTRIBUTION OF PATIENTS ENTERING THE MODEL, BY HEALTH STATE .....                                                       | 15 |
| 63 | TABLE S2: ANNUAL TRANSITION PROBABILITIES - NATURAL HISTORY OF ACUTE AND CHRONIC HEPATITIS B (WITHOUT TREATMENT).....              | 17 |
| 64 | TABLE S3: POPULATIONS WITH HIGH PREVALENCE OF CHRONIC HEPATITIS B.....                                                             | 18 |
| 65 | TABLE S4: PROPORTION OF PERSONS SUSCEPTIBLE TO HEPATITIS B, BY SUBGROUP .....                                                      | 19 |
| 66 | TABLE S5: SPECIFICITY AND SENSITIVITY OF HEPATITIS B SCREENING TESTS .....                                                         | 19 |
| 67 | TABLE S6: SCREENING AND LINKAGE TO CARE (TREATMENT OR VACCINATION) STRATEGIES MODELED, BY POPULATION .....                         | 23 |
| 68 | TABLE S7: SCREENING PROGRAM EFFECTIVENESS OF REFERRAL AND LINKAGE TO TREATMENT.....                                                | 24 |
| 69 | TABLE S8: SCREENING PROGRAM EFFECTIVENESS OF REFERRAL AND LINKAGE TO VACCINATION.....                                              | 25 |
| 70 | TABLE S9: TRANSITION PROBABILITIES WITH ANTI-VIRAL TREATMENT, YEAR 1.....                                                          | 27 |
| 71 | TABLE S10: ANNUAL PROBABILITIES WITH ANTI-VIRAL TREATMENT, YEAR 2+.....                                                            | 28 |
| 72 | TABLE S11: ANNUAL PROBABILITIES FOR DEVELOPING RESISTANCE TO NUCLEOS(T)IDE THERAPIES.....                                          | 29 |
| 73 | TABLE S12: PROPORTION OF PATIENTS RETREATED ON AN ANNUAL BASIS AFTER DISCONTINUATION OF THERAPY OR DEVELOPMENT OF RESISTANCE ..... | 29 |
| 74 | TABLE S13: PROPORTION OF PATIENTS WITH SUPPRESSED HEPATITIS B DNA IN THE FIRST YEAR OF TREATMENT AND SUBSEQUENT YEARS .....        | 30 |
| 75 | TABLE S14: RISK REDUCTION OF ADVANCED LIVER DISEASE WITH SUPPRESSED HEPATITIS B VIRUS DNA WITH TREATMENT .....                     | 31 |
| 76 | TABLE S15: ANNUAL INCIDENCE OF HORIZONTAL ACUTE INFECTION AMONGST SUSCEPTIBLE ADULTS WITHIN A POPULATION.....                      | 32 |
| 77 | TABLE S16: HEPATITIS B VACCINE EFFECTIVENESS RATES AMONG THOSE COMPLETING THE 3-DOSE SERIES, BY NUMBER OF DOSES .....              | 32 |
| 78 | TABLE S17: HEALTH STATE UTILITIES .....                                                                                            | 33 |
| 79 | TABLE S18: ANNUAL UTILITY LOSS DUE TO TREATMENT .....                                                                              | 33 |
| 80 | TABLE S19: HEPATITIS B HEALTH STATE COSTS (ANNUAL EXCEPT AS NOTED WITH E FOR EPISODE) .....                                        | 34 |
| 81 | TABLE S20: INITIAL DIAGNOSTIC TESTS, FREQUENCY OF TESTING AND RELATED COSTS.....                                                   | 35 |
| 82 | TABLE S21: TESTS FOR MONITORING TREATMENT, FREQUENCY OF TESTING AND RELATED COSTS.....                                             | 36 |
| 83 | TABLE S22: ADMINISTRATIVE COSTS OF SCREENING PROGRAMS.....                                                                         | 37 |
| 84 | TABLE S23: COST OF TREATMENTS.....                                                                                                 | 37 |
| 85 | TABLE S24: COST OF HEPATITIS B VACCINES .....                                                                                      | 38 |
| 86 | TABLE S25: ANNUAL COST OF MEDICAL MANAGEMENT OF TREATMENT RELATED ADVERSE EVENTS .....                                             | 38 |
| 87 | TABLE S26: AGE DEPENDENT TRANSITIONS FROM IMMUNE TOLERANT TO IMMUNE ACTIVE PHASE .....                                             | 39 |
| 88 | TABLE S27: CHB NATURAL HISTORY MODEL VALIDATION FOR CIRRHOSIS AND HCC WITH REVEAL-HBV STUDY.....                                   | 42 |
| 89 | TABLE S28: RESULTS OF 25,000 NATURAL HISTORY MODEL SIMULATIONS OVER VARYING TIME-HORIZONS .....                                    | 42 |

## Technical Supplement – Detailed Methods and Additional Results

|     |                                                                                                                               |    |
|-----|-------------------------------------------------------------------------------------------------------------------------------|----|
| 90  | TABLE S29: TREATMENT VALIDATION TEST COHORT AND TREATMENT CHARACTERISTICS .....                                               | 44 |
| 91  | TABLE S30: BASE-CASE RESULTS FOR SCREEN AND VACCINATE STRATEGY BY PROGRAM, BY POPULATION .....                                | 47 |
| 92  | TABLE S31: BASE-CASE RESULTS FOR SCREEN AND TREAT (WITH TENOFOVIR) STRATEGY BY PROGRAM, BY POPULATION .....                   | 48 |
| 93  | TABLE S32: BASE-CASE RESULTS FOR SCREEN AND TREAT (WITH ENTECAVIR) STRATEGY BY PROGRAM, BY POPULATION .....                   | 49 |
| 94  | TABLE S33: BASE-CASE RESULTS FOR SCREEN AND VACCINATE OR TREAT (WITH TENOFOVIR) STRATEGY BY PROGRAM, BY POPULATION .....      | 50 |
| 95  | TABLE S34: BASE-CASE RESULTS FOR SCREEN AND VACCINATE OR TREAT STRATEGY BY PROGRAM, BY POPULATION.....                        | 51 |
| 96  | TABLE S35: BASE-CASE RESULTS FOR SCREENING AND LINKAGE TO CARE (TENOFVIR TREATMENT) STRATEGIES, BY POPULATION .....           | 52 |
| 97  | TABLE S36: BASE-CASE RESULTS FOR SCREENING AND LINKAGE TO CARE (ENTECAVIR TREATMENT) STRATEGIES, BY POPULATION .....          | 53 |
| 98  | TABLE S37: SCENARIO ANALYSIS - IMPROVED SCREENING AND LINKAGE TO CARE, USING TENOFOVIR BASED TREATMENT AND RETREATMENT - ICER |    |
| 99  | CALCULATIONS .....                                                                                                            | 55 |
| 100 | TABLE S38: SCENARIO ANALYSIS - IMPROVED SCREENING AND LINKAGE TO CARE, USING ENTECAVIR BASED TREATMENT AND RETREATMENT - ICER |    |
| 101 | CALCULATIONS .....                                                                                                            | 56 |
| 102 | TABLE S39: EFFECT OF PREVALENCE AND INCIDENCE ON COST-EFFECTIVENESS OF THE INCLUSIVE STRATEGY, BY POPULATION .....            | 66 |

103  
104  
105  
106  
107  
108  
109  
110  
111  
112  
113  
114  
115  
116  
117  
118  
119  
120  
121  
122  
123  
124  
125  
126  
127  
128  
129  
130  
131  
132  
133  
134  
135  
136  
137  
138  
139  
140  
141  
142  
143  
144  
145  
146  
147

## I. Modelling

### 1. Model assumptions

#### Modelling natural history: Key assumptions

1. Patients entered the model in one of two ways:
  - a. To reflect the current population distribution of chronic hepatitis B at diagnosis, patients *started* the simulation in one of seven CHB health states:
    - i. Immune tolerant (after perinatal transmission)
      1. Perinatal infection and immune tolerant state were built into the model for completeness of the natural history and to allow for full calibration of the model. This study does not analyze perinatal infection.
    - ii. Inactive HBeAg *negative*. This group can be:
      1. Non-cirrhotic
      2. Cirrhotic
    - iii. Active HBeAg *positive* chronic hepatitis B. This group can be:
      1. Non-cirrhotic
      2. Cirrhotic
    - iv. Active HBeAg *negative* chronic hepatitis B. This group can be:
      1. Non-cirrhotic
      2. Cirrhotic
  - b. New infections (perinatal and horizontal adult exposures) could *enter* via the initial exposure and acute hepatitis B state, and may progress to the states above. Detail below.
2. Adult patients who acquired hepatitis B while in the model through transmission entered the acute hepatitis B state and transitioned into either chronic hepatitis B, immune active phase (HBeAg+), or achieve hepatitis B surface antigen (HBsAg) clearance. Asymptomatic and symptomatic acute hepatitis, fulminant hepatitis (amongst symptomatic patients), and death and liver transplant from fulminant hepatitis was modeled in this state.
3. Perinatal transmissions of hepatitis B did not enter the acute hepatitis state; these patients entered the immune tolerant or surface antigen clearance state.
4. Horizontal transmission for children under 5 was not be modeled.
5. Immune tolerant patients experienced annual progression to immune active phase of chronic hepatitis B into the non-cirrhotic, HBeAg *positive* and HBsAg positive state.
6. Progression from immune tolerant phase to active phase was age-specific so that all patients enter active hepatitis B before 40 years of age. This was based on epidemiological findings that majority of patients will transition into active hepatitis B between the ages of 20 and 40, based on genotype of hepatitis B virus.<sup>1,2</sup>
7. Patients in HBeAg *positive* status with active disease, both non-cirrhotic and cirrhotic, were able to transition to active corresponding HBeAg *negative* states.
8. HBeAg+ can jump to inactive state without going through the HBeAg- active state.
9. Inactive states were HBeAg- (with suppressed HBV DNA (<2000 IU/ml) and normal liver enzymes) and Anti-HBe.
10. Patients in active HBeAg *positive* and HBeAg *negative* states (both non-cirrhotic and cirrhotic), can transition into HBeAg *negative*, anti-HBe (inactive stat in which antibodies to HBeAg have developed) state.
11. Patients who seroconvert to anti-HBe and are in the *inactive* state were able to experience reactivation of HBeAg *negative* and HBeAg *positive* active hepatitis.

- 148 12. Cirrhosis regression in natural history was not be modeled for patients who achieved anti-HBs.  
149 13. Cirrhosis regression in natural history was not be modeled for HBeAg+ and HBeAg- who entered  
150 inactive states.  
151 14. Non-cirrhotic patients who achieved HBsAg clearance/anti-HBs status were allowed to progress to  
152 cirrhosis, in sensitivity analyses.  
153 15. Inactive chronic hepatitis B state in this model were marked by anti-HBe positive with normal ALT  
154 and low DNA levels.  
155 16. Chronic hepatitis B patients who achieve inactive state were eligible for HBsAg seroconversion to  
156 anti-HBs (used interchangeably with HBsAg seroclearance and “resolved”).  
157 17. Patients who seroconverted to anti-HBs (i.e. enter the resolved state) did not experience  
158 reactivation of chronic hepatitis B (not modeled).  
159 18. Reoccurrence of hepatitis B in patients who underwent liver transplantation was not be modeled.  
160 19. Patients were able to transmit the virus, on an annual basis, to a susceptible individual, adjusted for  
161 a given population, in any state except after seroconversion of HBsAg to anti-HBs (or resolved) state.  
162 20. For perinatal infections, risk for infection and establishment of chronic hepatitis B were stratified  
163 according to mother’s HBeAg status as *negative* or *positive*.  
164 21. Patients could develop hepatocellular carcinoma from any state except initial exposure/acute  
165 hepatitis states, resolved, and post-liver transplant.  
166 22. The model did not distinguish between patient sex or hepatitis B virus genotype, although these  
167 factors can influence clinical outcomes.  
168 23. Patients experienced age-specific background mortality based on US life tables.  
169 24. Hepatitis B related excess mortality was modeled in active and inactive hepatitis B states, non-  
170 cirrhotic and cirrhotic.  
171 25. Hepatitis B related mortality for advanced states (fulminant failure, liver failure, liver carcinoma,  
172 liver transplantation and post-liver transplant) was also be modeled. Background mortality in these  
173 states will not be portrayed.

174 Modelling treatment: Key assumptions

- 175 26. The model included treatment naïve and lamivudine-experienced patients.  
176 27. Treatment was only initiated in active CHB (HBeAg- or HBeAg+). Treatment was not be modeled in  
177 immune tolerant phase, decompensated cirrhosis or liver cancer.  
178 28. Lamivudine experienced or resistance patients, if retreated, were eligible only for tenofovir therapy,  
179 due to evidence of developing high levels of resistance with entecavir therapy.<sup>3</sup>  
180 29. Entecavir experienced or resistance patients, if retreated, were eligible for only tenofovir switch.  
181 30. Patients who experienced tenofovir resistance will go into natural history of CHB and were not  
182 allowed retreatment.  
183 31. Treatment of CHB occurred in the immune active phases, depending on the status of DNA, ALT, and  
184 histological disease. It increased the transition from active phases to the inactive phase, and  
185 indirectly to resolved disease.  
186 32. Treatment, depending on drug and duration, increased transition of HBeAg *positive* / HBsAg  
187 positive, both non-cirrhotic and cirrhotic, to HBeAg *negative* / HBsAg positive. Transition  
188 probabilities for HBeAg seroconversion with treatment were varied over time (higher in the first  
189 year).  
190 33. Transition probabilities for drug resistance were varied over the first five years for each treated  
191 patient, remaining constant in subsequent years.

- 192 34. Transition probabilities for viral suppression (lower DNA) were varied over time. In the Markov this  
193 is represented as transition to HBeAg negative state and inactive disease.  
194 35. Transition probabilities for HBsAg seroconversion were varied over time, dependent on treatment.  
195 36. For all HBeAg- and cirrhotic HBeAg+ patients, treatment was modeled to continue until HBsAg loss.  
196 37. For non-cirrhotic HBeAg+, treatment was continued for 12 months after achieving inactive disease  
197 (i.e. seroconversion to anti-HBe), regardless of HBsAg status. Once in the inactive state, patients  
198 followed the natural history. And those who experienced reactivation of CHB to HBeAg+ or HBeAg-  
199 states, if retreated, were eligible for tenofovir therapy.  
200 38. Patients who discontinued treatment (either tenofovir or entecavir) entered natural history. These  
201 patients, if retreated, were eligible for tenofovir treatment only.  
202 39. Cirrhosis regression in treatment was modeled for patients who achieved anti-HBs.  
203 40. Cirrhosis regression in treatment was modeled for HBeAg+ and HBeAg- who entered inactive states.

204 Modelling prevention: Key assumptions

- 205 41. For susceptible high-risk adults, prevention with hepatitis B vaccine was modeled, taking into  
206 consideration the probability of completing one, two or all three doses of the series.  
207 42. Data for completing vaccine series was derived from population specific literature when possible.  
208 Assumptions, based on other high-risk populations, was used when population-specific data were  
209 unavailable.

210 Modelling screening and linkage to care: Key assumptions

- 211 43. High risk, high prevalence populations were modeled for targeted screening and linkage to care.  
212 44. 'Care' in the model will consist of treatment (for those with active CHB) or vaccination for  
213 susceptible adults.  
214 45. Three screening and linkage options were modeled: 1) screen and treat; 2) screen and vaccinate;  
215 and 3) screen and treat or vaccinate.  
216 46. For each screening and linkage option, population and program specific inputs were used. When  
217 population specific program inputs for screening and linkage were not available, data from other  
218 hepatitis B programs or other disease (such as hepatitis C) screen and linkage programs was used.  
219 47. The model took into account the probability of false negatives and false positives with screening  
220 tests and allocated costs and patient disposition accordingly.

221 Transmission: Key assumptions

- 222 48. Within population transmission based on annual incidence rates of acute hepatitis B in high-risk  
223 populations were modeled for susceptible adult patients.  
224 49. Populations did not interact with each other in this model.

225

226  
227  
228  
229

## 2. Markov structure

Markov tree and stages: Figure 4 below is a detailed portrayal of the Markov disease state structure. It shows the natural history of acute HBV infection and chronic hepatitis B Markov with transitions from source to target states. It uses mainly *annual* transition probabilities between health states.



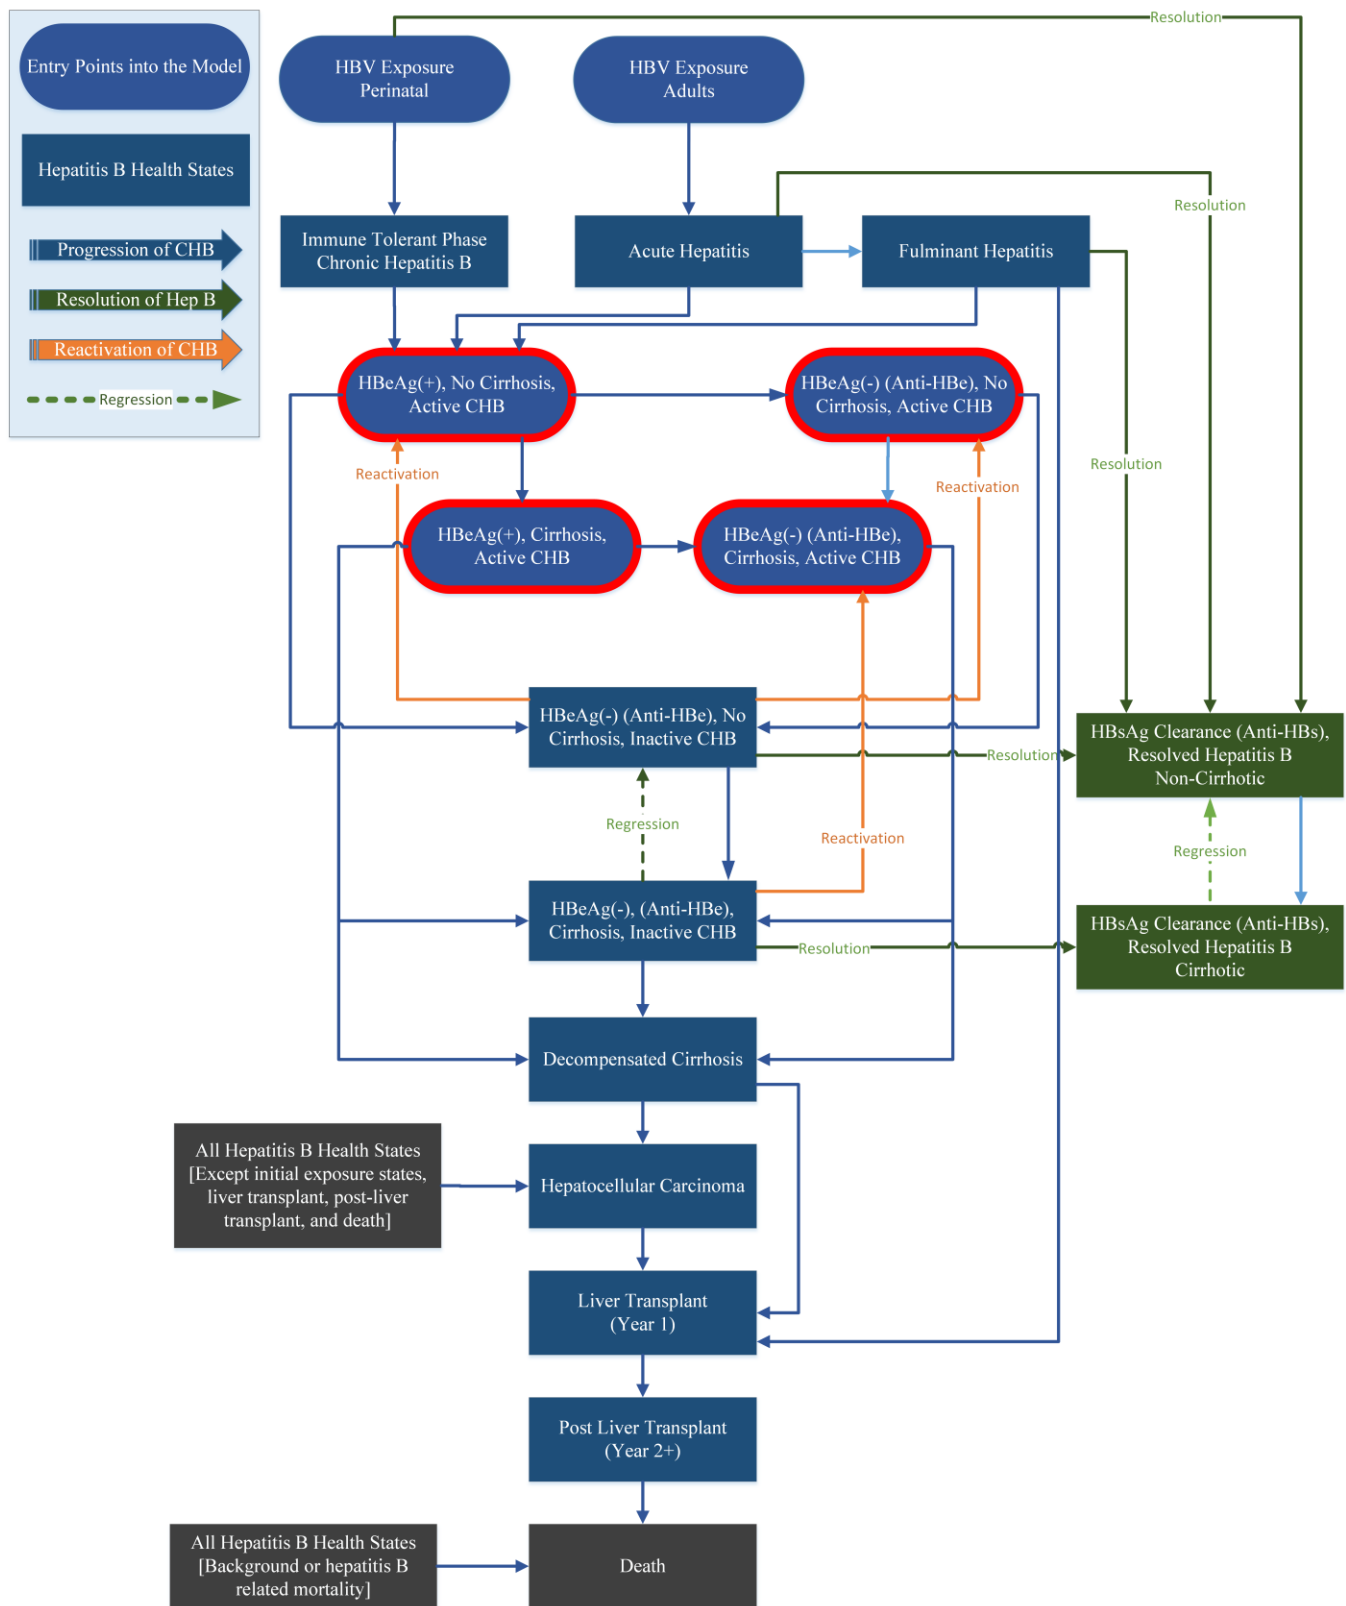

230

231 *Figure S1: Markov state diagram of natural history of acute and chronic hepatitis B*

232 **Supplement Figure 1 description:** *The figure depicts the natural history of hepatitis B virus infection from initial*  
 233 *exposure and infection (acute HBV) to development of chronic hepatitis B (CHB) health states (blue boxes). The*

234 *diagram flows from top (initial exposure, initial health states) to bottom (advanced liver diseases and death). The*  
235 *blue arrows show progression from a health state of lower severity to higher severity. Solid green arrows depict*  
236 *resolution of HBV infection, defined as hepatitis B surface antigen clearance and/or development of antibody to*  
237 *the surface antigen (green boxes). Dashed green arrows show the potential for regression of liver cirrhosis to a*  
238 *non-cirrhotic state from inactive hepatitis B or resolved states. Orange arrows show reactivation of hepatitis B*  
239 *from inactive (HBeAg- and anti-HBe) states to either HBeAg- or HBeAg+ active hepatitis B. The ovals with red*  
240 *outline indicate health states in which treatment can initiate for patients with chronic hepatitis B.*

### 3. Model structure – simplified graphics

To illustrate how the hepatitis B model was operationalized, in addition to **Figure 1** in the main paper, simplified figures of the model’s tree structure are produced below for reference.

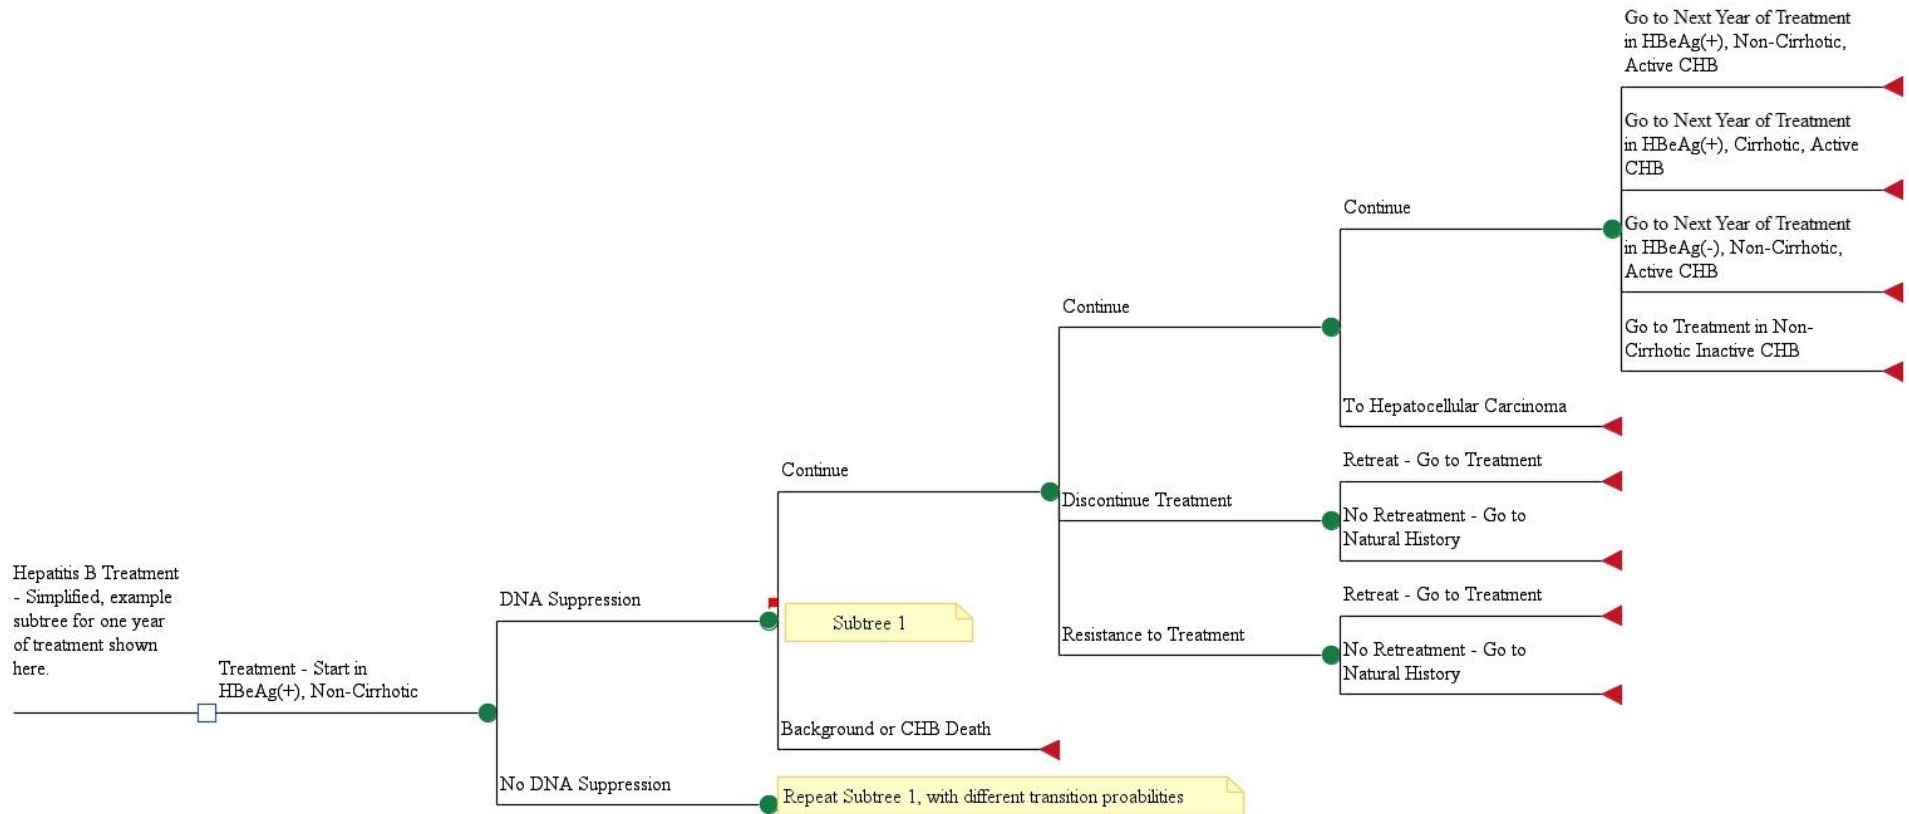

Figure S2: Simplified treatment model tree structure

Caption: The figure shows how the patients progress through the treatment model by using a simplified visualization of year 1 of treatment. Patients progress through the model to either achieve DNA suppression or not, depending on treatment selected and year of treatment, followed by CHB related and background death, discontinuation, development of resistance, and hepatocellular carcinoma. Patients then transition into HBeAg- state, inactive CHB state, cirrhosis or next year of treatment in the same state. In the model, the probabilities for many of the outcomes differ depending which year treatment the patients are in and whether or not DNA suppression has been successful.

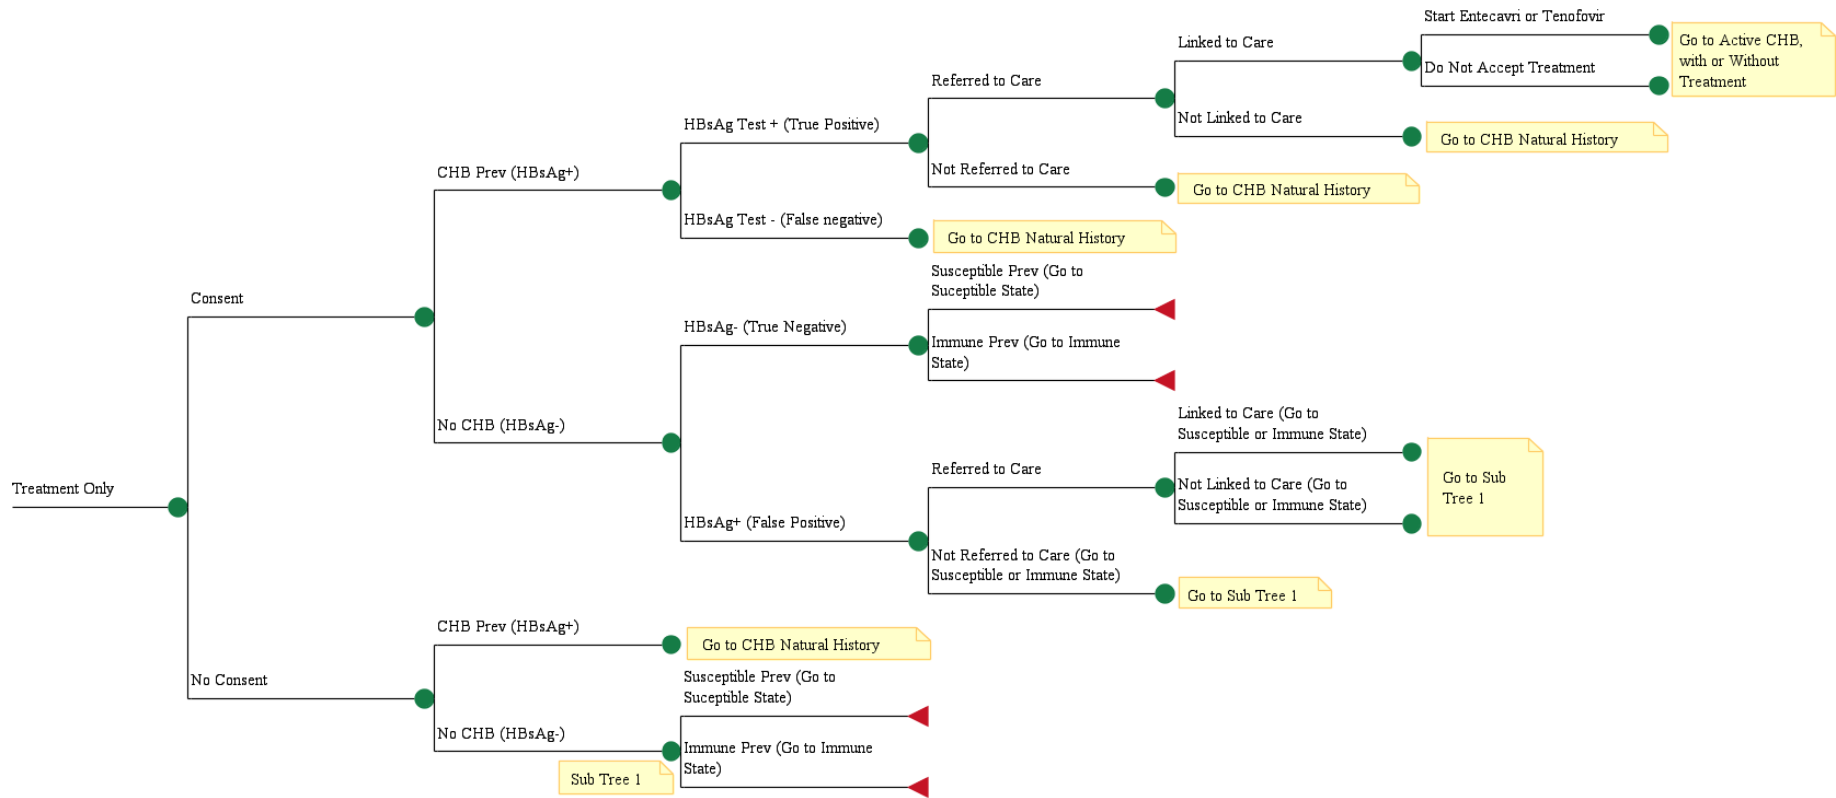

251

252 *Figure S3: Simplified screen and treat (treatment only) model tree structure*

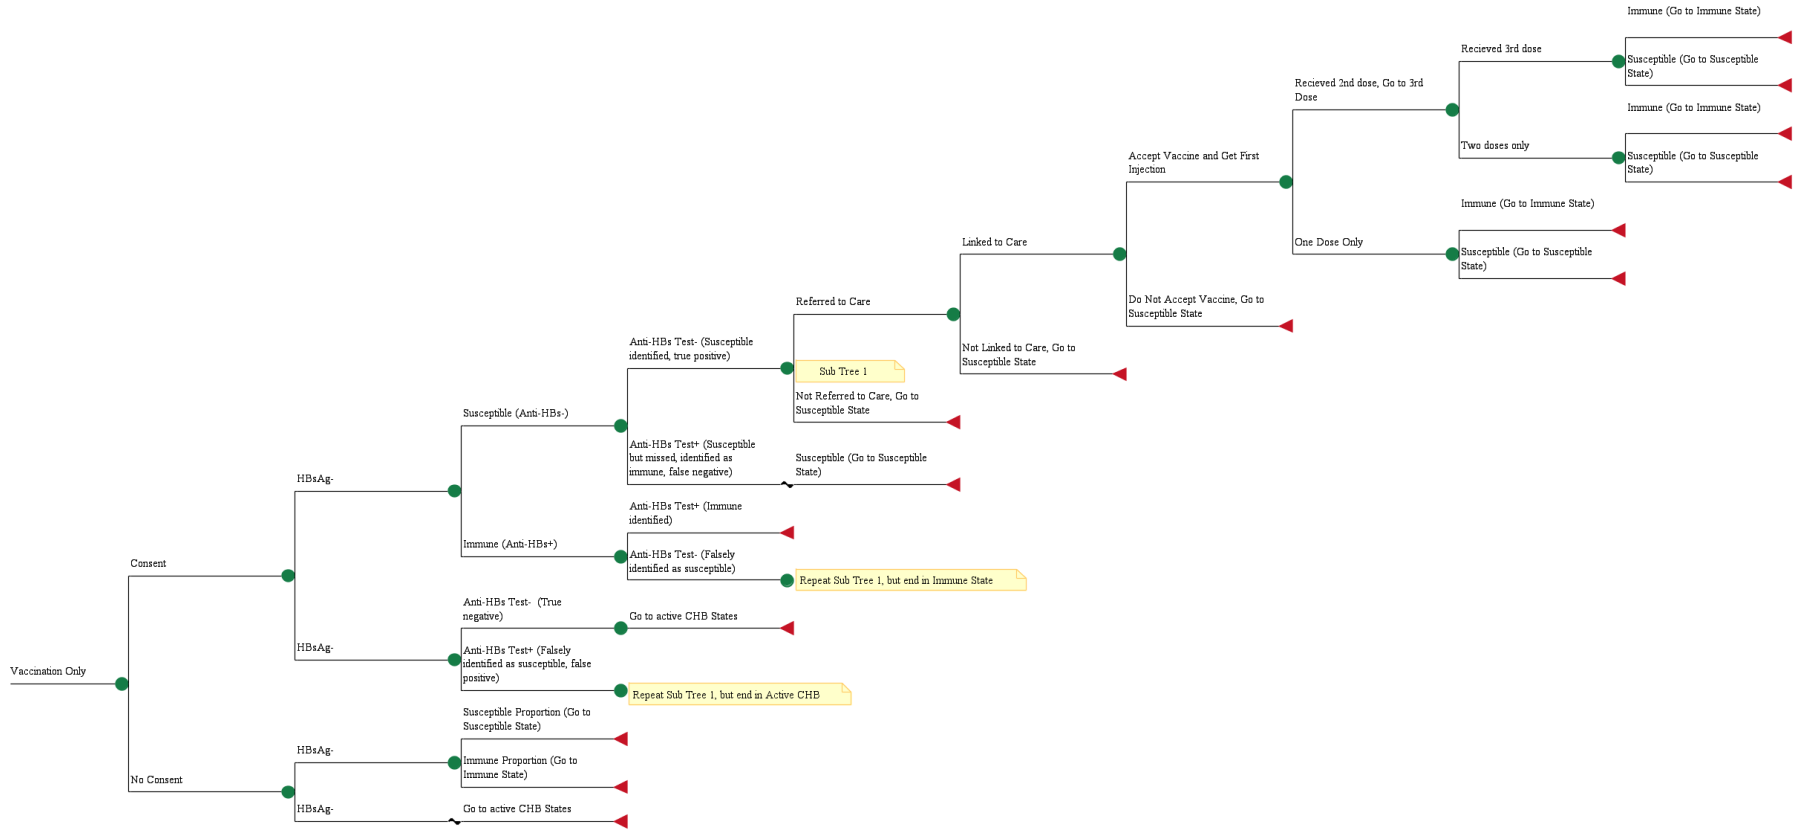

253

254

Figure S4: Simplified screen and vaccinate (vaccination only) model tree structure

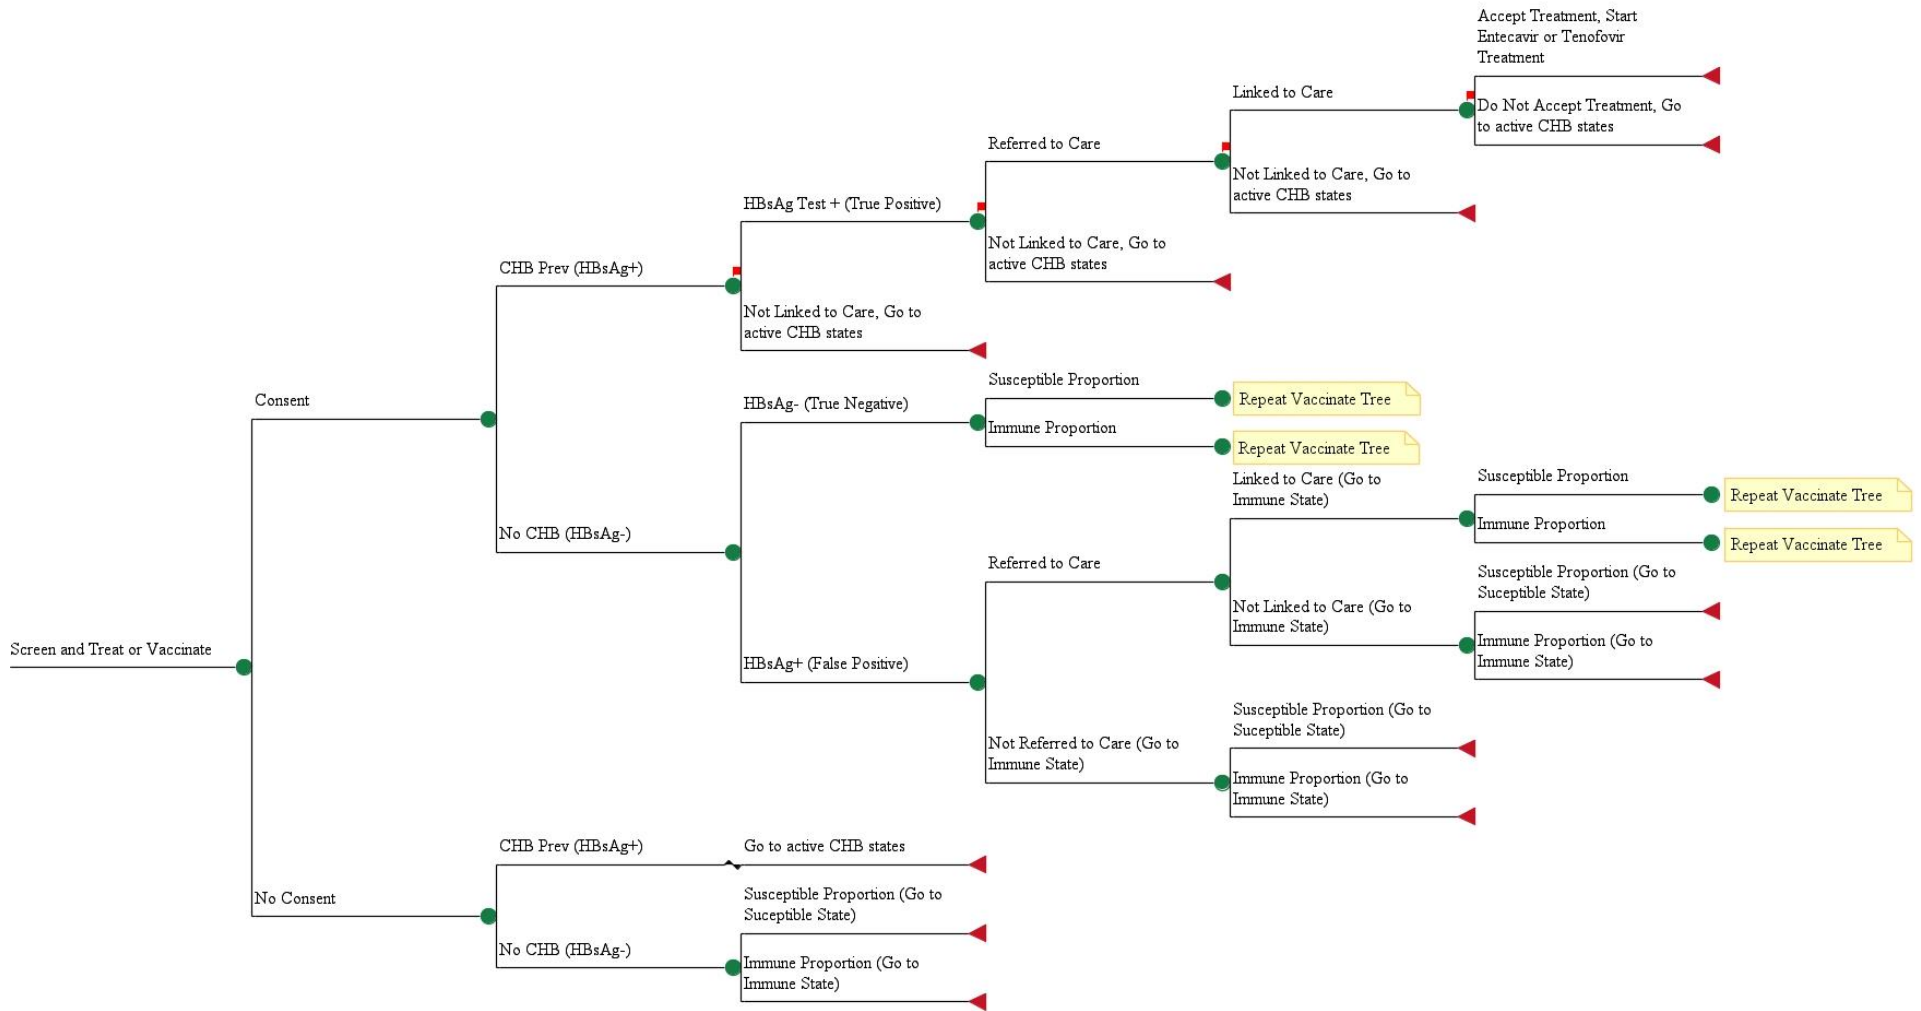

255

256 *Figure S5: Simplified screen and treat or vaccinate (inclusive) model tree structure*

257 **II. Model Inputs**

258 Below, input values for the model are listed by category. Multiple sources were used to collect data on input  
 259 parameters. We conducted literature reviews of published primary and economic analyses of hepatitis B.  
 260 The annual probabilities, patient distribution proportions, costs, utilities, and effectiveness of drugs and  
 261 prevention methods are extracted from literature, including previously published cost-effectiveness studies.  
 262 When annual transition probabilities for natural history were unavailable or refinement of estimates was  
 263 indicated, data were extracted from primary studies and annual probabilities calculated. Expert estimates  
 264 will be used for input parameters when necessary.

265 For calculation of annual probabilities from results over longer time periods, we followed established  
 266 methods<sup>4</sup> as provided by the following equations:

267 *Equation 1:  $r = -\frac{1}{t} \ln(1 - p)$*

268 *Equation 2:  $p = 1 - e^{-rt}$*

269 *where r = rate or risk; t = time; and p = cumulative proportion or probability*

270 **1. Distribution of patients entering the model**

271 A. Distribution of patients in immune tolerant, inactive and active (HBeAg positive and negative) states was  
 272 determined from primary literature.<sup>5</sup> There are, however, limited data to inform status of cirrhosis in  
 273 immune active and inactive phases. Thus, based on a previous economic analysis, it was assumed that,  
 274 in the initial entry cohort, 5% of patients in each of the immune active phases (HBeAg- and HBeAg+) and  
 275 the inactive phase are cirrhotic.<sup>6</sup> The number of patients in any given state were dynamically adjusted  
 276 over time based on the transition probabilities listed in the next section.

277 *Table S1: Distribution of patients entering the model, by health state*

| Markov entry state                                                                                                                                                                                                                                                                        | Base-case (%) | Lower Limit (%) | Upper Limit (%) | Ref          |
|-------------------------------------------------------------------------------------------------------------------------------------------------------------------------------------------------------------------------------------------------------------------------------------------|---------------|-----------------|-----------------|--------------|
| Immune Tolerant Phase                                                                                                                                                                                                                                                                     | 5.74          | 4.31            | 7.18            | <sup>5</sup> |
| Immune Active Phase (HBeAg+)                                                                                                                                                                                                                                                              |               |                 |                 |              |
| HBeAg+, Non-Cirrhotic                                                                                                                                                                                                                                                                     | 21.02         | 15.77           | 26.28           | <sup>5</sup> |
| HBeAg+, Cirrhotic*                                                                                                                                                                                                                                                                        | 1.11          | 0.83            | 1.38            | <sup>5</sup> |
| Immune Active Phase (HBeAg-)^                                                                                                                                                                                                                                                             |               |                 |                 |              |
| HBeAg-, Non-Cirrhotic                                                                                                                                                                                                                                                                     | 31.12         | 23.34           | 38.90           | <sup>5</sup> |
| HBeAg-, Cirrhotic*                                                                                                                                                                                                                                                                        | 1.64          | 1.23            | 2.05            | <sup>5</sup> |
| Immune Inactive Phase^                                                                                                                                                                                                                                                                    |               |                 |                 |              |
| HBeAg-, Inactive CHB, Non-Cirrhotic                                                                                                                                                                                                                                                       | 37.40         | 28.05           | 46.75           | <sup>5</sup> |
| HBeAg-, Inactive CHB, Cirrhotic*                                                                                                                                                                                                                                                          | 1.97          | 1.48            | 2.46            | <sup>5</sup> |
| *Prevalence of cirrhosis was assumed to be 5% amongst each of the three phases; distribution of cirrhotic patients calculated by authors based on the absolute numbers provided in the study.                                                                                             |               |                 |                 |              |
| ^Distribution of patients in the immune active HBeAg- and in the HBeAg- inactive phase were calculated by the authors from the study data. Immune active HBeAg- patients were defined as those with detectable DNA and elevated ALT (> 1 x Upper Normal Limit), as reported in the study. |               |                 |                 |              |
| HBeAg+/-: Hepatitis B e-antigen positive or negative; CHB: Chronic Hepatitis B; Ref: Reference                                                                                                                                                                                            |               |                 |                 |              |

279

280 **2. Transition probabilities for acute and chronic hepatitis B Markov health states: natural**  
 281 **history and with treatment**

282  
 283 **A. Natural history**

284 Probabilities for initial exposure and acute hepatitis in perinatal and adult horizontal infection were  
 285 collected from literature and previously published economic analyses.<sup>6-16</sup> We also collected and  
 286 meta-analyzed primary data when there was wide variability in published estimates or refinement  
 287 was needed, for example on the probability of mother to infant transmission by HBeAg status.<sup>17-31</sup>  
 288 Similarly, mortality from fulminant hepatitis B was aggregated from primary literature.<sup>32-37</sup> Wide  
 289 variability in point estimates on annual probability of HBsAg clearance was observed<sup>6,9,11,12,38</sup> so we  
 290 calculated annual probability of clearing HBsAg by combining primary literature.<sup>38-52</sup> There was a  
 291 dearth of data in published economic evaluations on development of hepatocellular carcinoma  
 292 following HBsAg clearance, thus we calculated annual probabilities from primary studies.<sup>45,49-53</sup>  
 293 Similar steps were taken to collect and refine data for development of cirrhosis<sup>54,55</sup> and  
 294 hepatocellular carcinoma<sup>55</sup> based on cirrhosis status in inactive phase of chronic hepatitis B.

295 **B. Development of HCC in Africa Born populations**

296 Evidence suggests that for sub-Saharan Africa born Black population, there is a higher incidence of  
 297 hepatocellular carcinoma at a younger age.<sup>56-61</sup> Although there is substantial heterogeneity in the  
 298 data, for this study, we assumed that the annual incidence of HCC in this population to be 1.5 times  
 299 higher (with a range of 1 to 2.5) than baseline rates used in the model for other populations. This  
 300 increase in annual probability of HCC is applied to all hepatitis B health states from which HCC can  
 301 develop.

302 **C. Development of chronic hepatitis B in people who inject drugs**

303 Evidence also suggests that PWIDs may have twice the risk of developing chronic hepatitis from  
 304 exposure than the general population.<sup>62</sup> In this model, we simulated the transition from acute to  
 305 chronic hepatitis for PWIDs to be 10% (varied from 5 to 15%), compared the 5% for other  
 306 populations.

307  
 308 Literature generally did not distinguish probabilities between active HBeAg negative vs positive  
 309 hepatitis B, so we assumed the probabilities to be equivalent. When confidence intervals were  
 310 unavailable for input parameters we used +/- 25% of the base case estimate to portray uncertainty.



311 Table S2: Annual Transition Probabilities - Natural History of Acute and Chronic Hepatitis B (without treatment)

| Source State                                      | Target State                         | Base Case (%)              | Lower Limit (%) | Upper Limit (%) | Reference            |
|---------------------------------------------------|--------------------------------------|----------------------------|-----------------|-----------------|----------------------|
| <b>HBV exposure, perinatal</b>                    |                                      |                            |                 |                 |                      |
| HBV Exposure, Perinatal, HBeAg+ mother            | Neonatal Infection                   | 87.0                       | 73.3            | 97.0            | 17-23,25-31          |
| HBV Exposure, Perinatal, HBeAg- mother            | Neonatal Infection                   | 14.0                       | 6.0             | 24.0            | 17-21,23,24,27,28,30 |
| Neonatal Infection                                | Immune Tolerant Phase                | 90.0                       | 85.0            | 95.0            | 63                   |
| Immune Tolerant Phase                             | HBeAg+, Active CHB, No Cirrhosis     | Age-Dependent <sup>1</sup> |                 |                 | Calculated           |
| <b>HBV exposure, adult</b>                        |                                      |                            |                 |                 |                      |
| HBV Exposure, Adult                               | Acute Hepatitis, Adult               | 100.0                      | 95.0            | 100.0           | Assumption           |
| Acute Hepatitis, Adult                            | Acute Hepatitis, Adult, Symptomatic  | 30.0                       | 20.0            | 40.0            | 16                   |
| Acute Hepatitis, Adult                            | Acute Hepatitis, Adult, Asymptomatic | 1 – Symptomatic Hepatitis  |                 |                 | 16                   |
| Acute Hepatitis, Adult, Symptomatic               | Fulminant Hepatitis <sup>2</sup>     | 4.0                        | 3.0             | 5.0             | 8,16                 |
| Fulminant Hepatitis                               | HBeAg+, Active CHB, No Cirrhosis     | 7.1                        | 5.3             | 8.9             | 9,11                 |
| Fulminant Hepatitis                               | HBsAg Clearance (Resolved)           | 1 – HBeAg+, Active CHB     |                 |                 | Calculated           |
| Fulminant Hepatitis                               | Liver Transplant                     | 1.70                       | 1.69            | 4.50            | 64                   |
| Fulminant Hepatitis                               | Death, Hepatitis B related           | 67.0                       | 50.3            | 83.8            | 32-36                |
| Acute Hepatitis, Adult, Asymptomatic <sup>3</sup> | HBeAg+, Active CHB, No Cirrhosis     | 5.0                        | 1.0             | 10.0            | 15,65,66             |
| Acute Hepatitis, Adult, Asymptomatic              | HBsAg Clearance (Resolved)           | 1 – HBeAg+, Active CHB     |                 |                 | 15                   |
| Acute Hepatitis, Adult, Symptomatic <sup>3</sup>  | HBeAg+, Active CHB, No Cirrhosis     | 5.0                        | 1.0             | 10.0            | 15,65,66             |
| Acute Hepatitis, Adult, Symptomatic               | HBsAg Clearance (Resolved)           | 1 – HBeAg+, Active CHB     |                 |                 | 15                   |
| <b>CHB, HBeAg+</b>                                |                                      |                            |                 |                 |                      |
| HBeAg+, Active CHB, Non-Cirrhotic                 | HBeAg+, Active CHB, Cirrhotic        | 2.4                        | 0.7             | 3.8             | 12,15                |
| HBeAg+, Active CHB, Non-Cirrhotic                 | HBeAg-, Active CHB, Non-Cirrhotic    | 1.9                        | 1.0             | 3.8             | 12                   |
| HBeAg+, Active CHB, Cirrhotic                     | HBeAg-, Active CHB, Cirrhotic        | 1.9                        | 1.0             | 3.8             | 12                   |
| HBeAg+, Active CHB, Non-Cirrhotic                 | HBeAg-, Inactive CHB, Non-Cirrhotic  | 9.5                        | 7.1             | 11.9            | 16                   |
| HBeAg+, Active CHB, Cirrhotic                     | HBeAg-, Inactive CHB, Cirrhotic      | 9.5                        | 7.1             | 11.9            | 16                   |
| <b>CHB, HBeAg-</b>                                |                                      |                            |                 |                 |                      |
| HBeAg-, Active CHB, Non-Cirrhotic                 | HBeAg-, Active CHB, Cirrhotic        | 4.6                        | 0.5             | 15.0            | 12,15                |
| HBeAg-, Active CHB, Non-Cirrhotic                 | HBeAg-, Inactive CHB, Non-Cirrhotic  | 1.6                        | 0.0             | 11.0            | 12                   |
| HBeAg-, Active CHB, Cirrhotic                     | HBeAg-, Inactive CHB, Cirrhotic      | 1.6                        | 0.0             | 11.0            | 12                   |
| HBeAg-, Inactive CHB, Non-Cirrhotic               | HBeAg-, Inactive CHB, Cirrhotic      | 0.6                        | 0.4             | 0.7             | 54,55                |
| <b>Reactivation of CHB</b>                        |                                      |                            |                 |                 |                      |
| HBeAg-, Inactive CHB, Non-Cirrhotic               | HBeAg+, Active CHB, Non-Cirrhotic    | 0.200                      | 0.185           | 0.300           | 67                   |
| HBeAg-, Inactive CHB, Non-Cirrhotic               | HBeAg-, Active CHB, Non-Cirrhotic    | 1.6                        | 1.2             | 2.0             | 67                   |
| HBeAg-, Inactive CHB, Cirrhotic                   | HBeAg-, Active CHB, Cirrhotic        | 0.7                        | 0.5             | 0.9             | 67                   |
| <b>Progression to DC</b>                          |                                      |                            |                 |                 |                      |
| HBeAg+, Active CHB, Cirrhotic                     | Decompensated Cirrhosis              | 5.0                        | 2.3             | 9.5             | 6,15                 |
| HBeAg-, Active CHB, Cirrhotic                     | Decompensated Cirrhosis              | 5.0                        | 2.3             | 9.5             | 51,53                |
| HBeAg-, Inactive CHB, Cirrhotic                   | Decompensated Cirrhosis              | 0.0                        | 0.0             | 0.1             | Assumption           |
| <b>Progression to HCC<sup>4</sup></b>             |                                      |                            |                 |                 |                      |
| Immune Tolerant Phase                             | Hepatocellular Carcinoma             | 0.060                      | 0.045           | 0.075           | 68                   |
| HBeAg+, non-cirrhotic, Active CHB                 | Hepatocellular Carcinoma             | 0.5                        | 0.2             | 0.7             | 6,8,16               |
| HBeAg+, Active CHB, Cirrhotic                     | Hepatocellular Carcinoma             | 2.4                        | 0.2             | 8.1             | 6,8,16               |
| HBeAg-, Active CHB, Non-Cirrhotic                 | Hepatocellular Carcinoma             | 0.5                        | 0.2             | 0.7             | 6,8,16               |
| HBeAg-, Active CHB, Cirrhotic                     | Hepatocellular Carcinoma             | 2.4                        | 0.2             | 8.1             | 6,8,16               |
| HBeAg-, Inactive CHB, Non-Cirrhotic               | Hepatocellular Carcinoma             | 0.100                      | 0.075           | 0.125           | 55                   |
| HBeAg-, Inactive CHB, Cirrhotic                   | Hepatocellular Carcinoma             | 1.1                        | 0.9             | 1.4             | 55                   |
| Decompensated Cirrhosis                           | Hepatocellular Carcinoma             | 6.3                        | 3.0             | 7.0             | 15                   |
| Anti-HBs                                          | Hepatocellular Carcinoma             | 0.7                        | 0.5             | 0.9             | 45,49-53             |
| <b>Progression to Liver Transplant</b>            |                                      |                            |                 |                 |                      |
| Decompensated Cirrhosis                           | Liver Transplant                     | 1.70                       | 1.69            | 4.50            | 64                   |
| Hepatocellular Carcinoma                          | Liver Transplant                     | 1.70                       | 1.69            | 4.50            | 64                   |
| <b>CHB related mortality</b>                      |                                      |                            |                 |                 |                      |
| Immune Tolerant Phase                             | Death                                | 0.7                        | 0.0             | 0.9             | 9,14                 |

|                                                    |                                     |      |      |      |            |
|----------------------------------------------------|-------------------------------------|------|------|------|------------|
| HBeAg+, non-cirrhotic, Active CHB                  | Death                               | 1.0  | 0.3  | 2.8  | 15         |
| HBeAg+, Active CHB, Cirrhotic                      | Death                               | 3.0  | 1.3  | 4.8  | 15         |
| HBeAg-, Active CHB, Non-Cirrhotic                  | Death                               | 1.0  | 0.3  | 2.8  | 15         |
| HBeAg-, Active CHB, Cirrhotic                      | Death                               | 3.0  | 1.3  | 4.8  | 15         |
| HBeAg-, Inactive CHB, Non-Cirrhotic                | Death                               | 0.7  | 0.4  | 0.9  | 15         |
| HBeAg-, Inactive CHB, Cirrhotic                    | Death                               | 0.7  | 0.4  | 0.9  | Assumption |
| Decompensated Cirrhosis                            | Death                               | 12.9 | 10.3 | 15.5 | 69         |
| Hepatocellular Carcinoma                           | Death                               | 42.7 | 34.2 | 51.2 | 69         |
| Anti-HBs                                           | Death                               | 0.0  | 0.0  | 0.9  | 6          |
| <b>Liver transplant related mortality</b>          |                                     |      |      |      |            |
| Liver Transplant                                   | Death                               | 10.7 | 9.0  | 13.0 | 69         |
| Post Liver Transplant                              | Death                               | 4.9  | 3.9  | 5.9  | 69         |
| <b>Clearance of HBsAg</b>                          |                                     |      |      |      |            |
| HBeAg-, Inactive CHB, Non-Cirrhotic                | Anti-HBs, Non-Cirrhotic             | 0.8  | 0.6  | 0.9  | 38-52      |
| HBeAg-, Inactive CHB, Cirrhotic                    | Anti-HBs, Cirrhotic                 | 0.8  | 0.6  | 0.9  | 38-52      |
| <b>Regression of Cirrhosis</b>                     |                                     |      |      |      |            |
| HBeAg-, Inactive CHB, Cirrhotic                    | HBeAg-, Inactive CHB, Non-Cirrhotic | 0.0  | 0.0  | 0.5  | Assumption |
| Anti-HBs, Cirrhotic                                | Anti-HBs, Non-Cirrhotic             | 0.0  | 0.0  | 0.5  | Assumption |
| <b>Progression of cirrhosis post-HBs Clearance</b> |                                     |      |      |      |            |
| Anti-HBs, Non-Cirrhotic                            | Anti-HBs, Cirrhotic                 | 0.0  | 0.0  | 0.5  | Assumption |

1: Model calibrated to match natural history data. See Section III of Supplement for details.

2: Development of fulminant hepatitis applied only to patients who develop symptomatic acute hepatitis (i.e. 4% risk of fulminant hepatitis among 30% who develop acute hepatitis in base-case)

3: Double for PWID

4: 1.5x baseline for Africa born Blacks

HBeAg+/-: Hepatitis B e-antigen positive or negative; HBV: Hepatitis B Virus; CHB: Chronic Hepatitis B; HBs – Hepatitis B Surface Antigen ; Anti-HBs – Antibody to Hepatitis B Surface Antigen;

312

### 313 3. Screening and linkage to care inputs

314 The following section details the strategies for screening and linking to care (treatment or vaccination) by  
 315 various populations of interest to this model. The data for prevalence of active hepatitis B and susceptibility  
 316 are also shown for each population.

#### 317 A. Prevalence of chronic hepatitis B, by subgroup

318 The table below shows the data for prevalence of chronic hepatitis B (HBsAg+) in adults (age 18 and over)  
 319 within selected populations.

320 *Table S3: Populations with high prevalence of chronic hepatitis B*

| Populations with high prevalence of chronic hepatitis B                                                                                                                      | Group level prevalence of chronic hepatitis B |                  |                  | Ref |
|------------------------------------------------------------------------------------------------------------------------------------------------------------------------------|-----------------------------------------------|------------------|------------------|-----|
|                                                                                                                                                                              | Base Case (%)                                 | Lower Limit (%)  | Upper Limit (%)  |     |
| Foreign born Asian and Pacific Islanders                                                                                                                                     | 7.9                                           | 5.9 <sup>^</sup> | 9.9 <sup>^</sup> | 70  |
| Incarcerated persons                                                                                                                                                         | 1.4                                           | 0.3              | 3.1              | 71  |
| People who inject drugs                                                                                                                                                      | 11.8                                          | 3.5              | 20               | 72  |
| Men who have sex with men                                                                                                                                                    | 2.3                                           | 1.7              | 2.9              | 73  |
| Africa born                                                                                                                                                                  | 9.7                                           | 7.3 <sup>^</sup> | 12 <sup>^</sup>  | 74  |
| Refugees                                                                                                                                                                     | 6.3 <sup>*</sup>                              | 4.7 <sup>^</sup> | 7.9 <sup>^</sup> | 75  |
| <sup>^</sup> Author selected to be +/- 25% of base-case value.<br><sup>*</sup> Calculated from study data based on refugees screened between 2011 and 2014<br>Ref: Reference |                                               |                  |                  |     |

321

322 B. Proportion of persons susceptible to hepatitis B, by subgroup

323 The table below shows the proportion of adult (age 18 and over) populations that are expected to be  
 324 susceptible to hepatitis B virus. This is excluding individuals who are positive for HBsAg (i.e. CHB) and  
 325 have natural or vaccine induced immunity.

326 *Table S4: Proportion of persons susceptible to hepatitis B, by subgroup*

| Populations at high risk of hepatitis B                                                            | Group level susceptibility to hepatitis B virus |                  |                  | Ref   |
|----------------------------------------------------------------------------------------------------|-------------------------------------------------|------------------|------------------|-------|
|                                                                                                    | Base Case (%)*                                  | Lower Limit (%)^ | Upper Limit (%)^ |       |
| Foreign born Asian and Pacific Islanders                                                           | 41                                              | 31               | 51               | 76    |
| Incarcerated persons                                                                               | 53                                              | 40               | 66               | 77,78 |
| People who inject drugs                                                                            | 44                                              | 33               | 55               | 79    |
| Men who have sex with men                                                                          | 62                                              | 47               | 78               | 73    |
| Africa born                                                                                        | 48                                              | 36               | 61               | 76    |
| Refugees                                                                                           | 55                                              | 41               | 69               | 80    |
| *Calculated from study data. All values rounded to the nearest whole number.                       |                                                 |                  |                  |       |
| ^Author selected to be +/- 25% of base-case value. All values rounded to the nearest whole number. |                                                 |                  |                  |       |
| Ref: Reference                                                                                     |                                                 |                  |                  |       |

327

328 C. Screening tests for hepatitis B

329 Numerous types of hepatitis B surface antigen and surface antibody tests are available, most are  
 330 highly specific and sensitive.<sup>81,82</sup> For the purposes of screening patients in this model, HBsAg and  
 331 anti-HBs assay tests will be modeled using the specificity and sensitivity as described in the table  
 332 below. HBsAg test is used to detect acute and chronic hepatitis B infection. Anti-HBs is used to  
 333 detect presence of immunity, either due to resolved past infection or vaccine-induced immunity.

334 *Table S5: Specificity and Sensitivity of hepatitis B screening tests*

| Test                                                                            | Specificity | Sensitivity | Lower Limit^ | Upper Limit^ | Ref.  |
|---------------------------------------------------------------------------------|-------------|-------------|--------------|--------------|-------|
| Hepatitis B Surface Antigen (HBsAg)*                                            | 99.97%      | 99.80%      | 0.95         | 1            | 83    |
| Hepatitis B Surface Antibody Test (Anti-HBs)                                    | 97.90%      | 99.80%      | 0.95         | 1            | 15,81 |
| *ARCHITECT HBsAg qualitative test (Abbott Laboratories, North Chicago, IL, USA) |             |             |              |              |       |
| ^Same limits for both specificity and sensitivity                               |             |             |              |              |       |
| Ref: Reference                                                                  |             |             |              |              |       |

335

336 D. Screening strategies and associated efficacy, by population

337 The goal of screening strategies is to identify hepatitis B susceptible persons or non-  
 338 treated/managed hepatitis B infected patients and connect them to care.<sup>84</sup> Care in the model is  
 339 modeled by either vaccination of susceptible persons or treatment of those with chronic hepatitis B.  
 340 The table below shows the various screening strategies that were modeled to either link patients to  
 341 treatment or to vaccination (**Table 28**).

342

343 As a comparator, a no intervention strategy (no screening and no linkage to care) was modeled for  
 344 each population. In the no intervention strategy individuals with active chronic hepatitis B  
 345 progresses through the natural history model. Those susceptible to hepatitis B enter a ‘susceptible’  
 346 stage in the model, through which persons can become infected with hepatitis B according to a  
 347 population specific annual incidence rate. Among those who become infected, they progress to  
 348 acute or chronic hepatitis B, per natural history probabilities discussed above. Those with prior  
 349 immunity (either natural or due to vaccination) enter the immune state of the model.

350

351 Much of the data for screening and linkage to care comes from two major initiatives, Hepatitis  
 352 Testing and Linkage to Care (HepTLC) and San Francisco Hepatitis B Free (SFHBF).<sup>70,74,75,85-90</sup> Evidence  
 353 for effectiveness of screening and linkage to care is not available for all populations; in such  
 354 circumstances the best available evidence from related screening programs was used. For example,  
 355 due to lack of evidence showing screening and linking the refugee population to vaccination, this  
 356 model uses the data from the SFHBF and assumptions were varied in sensitivity analyses. Other  
 357 exceptions are noted below in the tables as appropriate.

358  
 359 Interventions specific to each modeled population for screening and treatment and screening and  
 360 vaccination are discussed below. The efficacies of each program by population are shown in **Tables**  
 361 **29 and 30:**

362 1. *Foreign born persons: Asia and Pacific Islanders (APIs)*

363 For Asian and Pacific Islander (APIs) foreign born persons, three strategies for linkage to  
 364 treatment and two strategies for linkage to vaccination were modelled. Strategies for  
 365 linkage to treatment include: 1) no screening and no care; 2) screening and linkage to care  
 366 based on the data from HepTLC; and 3) screening and linkage to care based on the data  
 367 from SFHBF program. Strategies for vaccination (for susceptible individuals) included: 1) no  
 368 screening and no vaccination; and 2) screening and vaccination based on the San Francisco  
 369 Hepatitis B Free program.

370 A. *Linkage to treatment of APIs:*

371 *Intervention 1:* This strategy modeled the efficacy according to the HepTLC program. The  
 372 HepTLC strategy focused on community based, testing and linking to treatment  
 373 populations born in moderate to high prevalence countries ( $\Rightarrow$ 2% HBsAg).<sup>90</sup> The HepTLC  
 374 program recruited foreign born persons through community-based programs and  
 375 partnering with medical providers to conduct screening. Components of the program  
 376 used various methods to reach and link patients to care, including patient navigators,  
 377 however, detailed data on the effectiveness of such efforts are not available.<sup>74</sup> But data  
 378 on effectiveness of linkage to care for Asia and Africa born populations are available.<sup>90</sup>

379 *Intervention 2:* Standalone testing and vaccination sites with treatment referral and  
 380 community outreach.<sup>70</sup> San Francisco Hepatitis B Free program established seven testing  
 381 and vaccination sites for susceptible individuals and referral for medical care for those  
 382 with chronic hepatitis B.<sup>70</sup> Majority (80%) of the individuals covered by the program  
 383 were Asian/Pacific Islanders, of whom 66% were foreign born.<sup>70</sup> The data in the table  
 384 below for linkage to medical care and vaccination are from the entire cohort in the  
 385 program, but are adopted for foreign born Asian/Pacific Islanders for the purposes on  
 386 this analysis.

387 B. *Linkage to vaccination of APIs:*

388 *Intervention:* Using data from San Francisco Hepatitis B Free initiative, for those  
 389 identified as susceptible, the model used the vaccination rates shown in the table  
 390 below.<sup>70</sup> Those vaccinated enter the immune state in the model. If patients only receive  
 391 one or two doses, a subset experience protection (according to probabilities discussed  
 392 in a later section) while others go into the ‘susceptible’ stage.<sup>9</sup>

- 393                   2. *Foreign born persons: Africa Born Persons*  
 394                   For Africa born persons, two strategies for linkage to treatment and two strategies for  
 395                   linkage to vaccination were modelled. Strategies for linkage to treatment include: 1) no  
 396                   screening and no care; and 2) screening and linkage to care based on the data from HepTLC  
 397                   program.<sup>74</sup> Due to the lack of direct evidence for vaccination strategies in this population,  
 398                   strategies for vaccination (for those found to susceptible) include: 1) no screening and no  
 399                   vaccination; and 2) screening and vaccination based on the San Francisco Hepatitis B Free  
 400                   program.<sup>70</sup>
- 401                   A. *Linkage to treatment of Africa born persons:*  
 402                   Intervention: This strategy modeled the efficacy according to the HepTLC program. Program  
 403                   described above.<sup>74</sup>
- 404                   B. *Linkage to vaccination of Africa born persons:*  
 405                   Intervention: Reliable data specific to screening and linking Africa born persons who are  
 406                   susceptible to hepatitis B was not identified. Thus for this population data from the San  
 407                   Francisco Hepatitis B Free initiative was used to simulate the possible effects of a screening  
 408                   and vaccination program (described above).<sup>70</sup> Assumptions were varied in sensitivity  
 409                   analyses.
- 410                   3. *Foreign born persons: Refugees*  
 411                   For recently immigrated to the US refugee population, two strategies for screening and  
 412                   linkage to treatment and 2 strategies for screening and linkage to vaccination were  
 413                   modeled. Strategies for linkage to treatment include: 1) no screening and no care; and 2)  
 414                   screening and linkage to care based on the data from HepTLC program.<sup>75</sup> Due to the lack of  
 415                   direct evidence for vaccination strategies in this population, strategies for vaccination (for  
 416                   those found to susceptible) included: 1) no screening and no vaccination; and 2) screening  
 417                   and vaccination based on the San Francisco Hepatitis B Free program.<sup>70</sup>
- 418                   A. *Linkage to treatment of Refugees:*  
 419                   Intervention: The HepTLC strategy includes supplementation of the existing Minnesota  
 420                   Department of Public Health’s programs for screening refugees and linking the infected  
 421                   person to health care.<sup>75</sup> The HepTLC begin supplementing Minnesota’s existing program in  
 422                   2012, which has shown an increase in linkage to care.<sup>75</sup>
- 423                   B. *Linkage to vaccination of Refugees:*  
 424                   Intervention: Data specific to screening and linking refugees who are susceptible to  
 425                   hepatitis B has not been identified. Thus for this population data from the San Francisco  
 426                   Hepatitis B Free initiative (program described above) was used to simulate the possible  
 427                   effects of a screening and vaccination program.<sup>70</sup> Assumptions were varied in sensitivity  
 428                   analyses.
- 429                   4. *Incarcerated persons*  
 430                   For incarcerated persons, two strategies for linkage to treatment and two strategies for  
 431                   linkage to vaccination were modelled. Strategies for linkage to treatment included: 1) no  
 432                   screening and no care; and 2) a universally offered screening and treatment. Strategies for  
 433                   vaccination included: 1) no screening and no vaccination; and 2) screening and vaccination  
 434                   based on the available population specific evidence. The model does not explicitly model

individuals who are released and re-enter their respective communities. Release may result in lower follow up with treatment and reduce the chance of completing vaccination series.

A. Linkage to treatment for Incarcerated Persons:

Intervention: This includes offering universal screening to incarcerated population. Among those that accept screening, universal treatment was offered and linked to care.

B. Linkage to vaccination for Incarcerated Persons:

Intervention: Universal screen and vaccine offer. Data based on prison programs screening and offering vaccination was used, as shown in table below. Those vaccinated enter the immune state in the model. If patients only receive one or two doses, a subset experience protection (according to probabilities discussed in a later section) while others go into the ‘susceptible’ stage.

5. *Persons who inject drugs*

For persons who inject drugs (PWID), two strategies for linkage to treatment and two strategies for linkage to vaccination were modelled. Strategies for linkage to treatment included: 1) no screening and no care; and 2) a screening and treatment at syringe service programs.<sup>79</sup> In this model, we assume a program in which the syringe service site works in collaboration with local health care providers to link to care. Local provider network may include community health centers, opioid substance treatment clinics, and primary care providers. Strategies for vaccination (for susceptible individuals) included: 1) no screening and no vaccination; and 2) screening and vaccination based on the available population specific evidence.<sup>79</sup> Incentive pay to recruit patients for screening and to encourage patients to complete the vaccine series was modeled.<sup>79</sup>

A. Linkage to treatment for PWIDs:

Intervention: This includes offering universal screening to PWIDs presenting at syringe exchange programs. Among those that accept screening, treatment was offered and linked to care. Syringe service sites are uniquely positioned to screen and help link target population to care.<sup>91,92</sup> Experience from other screening programs with the PWID has shown significant challenges in successful linkage to care for this population, with treatment uptake between 2 to 10%.<sup>93,94</sup> Population specific data for screening and linkage to treatment at syringe exchange sites for hepatitis B was not available, thus the data for referring to and linking to care data from hepatitis C programs or assumptions as identified in the table below are used.<sup>74,93,94</sup>

B. Linkage to vaccination for PWIDs:

Intervention: Universal screen and vaccine offer was provided to PWIDs presenting at syringe service programs. The participants who accept and return for vaccination were offered compensation. Those vaccinated enter the immune state in the model. If patients only receive one or two doses, a subset experience protection (according to probabilities discussed in a later section) while others go into the ‘susceptible’ stage.

6. *Men who have sex with men*

For men who have sex with men (MSM), two strategies for linkage to treatment and two strategies for linkage to vaccination were modelled. Strategies for linkage to treatment included: 1) no screening and no care; and 2) a screening and treatment at sexually transmitted infections (STI) clinics based on assumed data. Strategies for vaccination (for

478 susceptible individuals) included: 1) no screening and no vaccination; and 2) screening and  
 479 vaccination based on data from STI clinics.

480 [A. Linkage to treatment for MSMs:](#)

481 Intervention: This includes offering universal screening to MSMs presenting at STI clinics.  
 482 Among those that accept screening, treatment was offered and men were linked to care.  
 483 Population specific data for screening and linkage to treatment at STI clinics was not  
 484 available, thus the data for referring to and linking to care are assumed based on other  
 485 available data.<sup>74</sup>

486 [B. Linkage to vaccination:](#)

487 Intervention: Universal screen and vaccine offer was provided to MSMs presenting at STI  
 488 clinics.<sup>95</sup> Those vaccinated enter the immune state in the model. If patients only receive  
 489 one or two doses, a subset experience protection (according to probabilities discussed in a  
 490 later section) while others go into the ‘susceptible’ stage.

491 *Table S6: Screening and linkage to care (treatment or vaccination) strategies modeled, by population*

| Population/Strategy        | Link to Treatment Strategies           | Link to Vaccination Strategies     | Link to Treatment or Vaccination Strategies |
|----------------------------|----------------------------------------|------------------------------------|---------------------------------------------|
| Asia and Pacific Islanders |                                        |                                    |                                             |
| Program 1                  | No screening and care                  | No screening and care              | No screening and care                       |
| Program 2                  | Community outreach/clinic partnership* | Community outreach/clinic referral | Community outreach/clinic referral          |
| Program 3                  | Community outreach/clinic referral^    |                                    |                                             |
| Africa born                |                                        |                                    |                                             |
| Program 1                  | No screening and care                  | No screening and care              | No screening and care                       |
| Program 2                  | Community outreach/clinic partnership  | Community outreach/clinic referral | Community outreach/clinic referral          |
| Refugees                   |                                        |                                    |                                             |
| Program 1                  | No screening and care                  | No screening and care              | No screening and care                       |
| Program 2                  | Community outreach/clinic partnership  | Community outreach/clinic referral | Community outreach/clinic referral          |
| Incarcerated               |                                        |                                    |                                             |
| Program 1                  | No screening and care                  | No screening and care              | No screening and care                       |
| Program 2                  | Universal screening offer              | Universal screening offer          | Universal screening offer                   |
| PWID                       |                                        |                                    |                                             |
| Program 1                  | No screening and care                  | No screening and care              | No screening and care                       |
| Program 2                  | Syringe services programs              | Syringe services programs          | Syringe services programs                   |
| MSMs                       |                                        |                                    |                                             |
| Program 1                  | No screening and care                  | No screening and care              | No screening and care                       |
| Program 2                  | STI Clinics                            | STI Clinics                        | STI Clinics                                 |

\*Based on Hepatitis Testing and Linkage to Care initiative (HepTLC)

^Based on San Francisco Hepatitis B Free initiative (SFHBF)

#When multiple options were available (clinic referral or partnership), most effective of the screening programs was used in this strategy

PWID = People who inject drugs; MSM = Men who have sex with men; STI = Sexually Transmitted Infections

492

493 Table S7: Screening program effectiveness of referral and linkage to treatment, by population

| Population and Intervention                        | Base-Case (%) | Lower Limit (%)* | Upper Limit (%)* | Ref        |
|----------------------------------------------------|---------------|------------------|------------------|------------|
| All Populations and Interventions                  |               |                  |                  |            |
| Acceptance of Screening for HBsAg                  | 70.0          | 40.0             | 100.0            | 15         |
| Accept anti-viral treatment                        | 75.0          | 50.0             | 100.0            |            |
| Asian and Pacific Islander Population / HepTLC     |               |                  |                  |            |
| Refer to Medical Care <sup>1</sup>                 | 98.0          | 73.5             | 100.0            | 74         |
| Linked to Medical Care <sup>1,2</sup>              | 45.6          | 34.2             | 57.0             | 74         |
| Asian and Pacific Islander Population / SFHBF      |               |                  |                  |            |
| Refer to Medical Care                              | 100.0         | 73.5             | 100.0            | 70         |
| Linked to Medical Care <sup>3</sup>                | 69.0          | 52.0             | 86.0             | 70         |
| Africa Born Population / HepTLC                    |               |                  |                  |            |
| Refer to Medical Care <sup>1</sup>                 | 98.0          | 73.5             | 100.0            | 74         |
| Linked to Medical Care <sup>1,2</sup>              | 71.9          | 54.0             | 90.0             | 74         |
| Refugee Population / HepTLC                        |               |                  |                  |            |
| Refer to Medical Care <sup>4</sup>                 | 98.0          | 73.5             | 100.0            | 74         |
| Linked to Medical Care                             | 93.1          | 70.0             | 100.0            | 75         |
| Incarcerated Population / Universal Screening      |               |                  |                  |            |
| Refer to Medical Care <sup>5</sup>                 | 100.0         | 75.0             | 100.0            | Assumption |
| Linked to Medical Care <sup>5</sup>                | 90.0          | 67.5             | 100.0            | Assumption |
| Persons Who Inject Drugs / Needle Exchange Clinics |               |                  |                  |            |
| Refer to Medical Care <sup>6</sup>                 | 75.0          | 56.0             | 94.0             | Assumption |
| Linked to Medical Care <sup>6</sup>                | 8.6           | 6.0              | 40.0             | 94         |
| Accept Treatment <sup>6</sup>                      | 6.0           | 1.6              | 40.0             | 93,94      |
| Men who Have Sex with Men / STI Clinics            |               |                  |                  |            |
| Refer to Medical Care <sup>6</sup>                 | 98.0          | 73.5             | 100.0            | 74         |
| Linked to Medical Care <sup>6</sup>                | 45.6          | 34.2             | 57.0             | 74         |

\*Author selected ranges of +/- 25% of base-case value.

HBsAg= Hepatitis B Surface Antigen; HepTLC = Hepatitis Testing and Linkage to Care initiative; SFHBF = San Francisco Hepatitis B Free initiative; STI = Sexually Transmitted Infections; Ref = References

1: Author calculated from study data.

2: Attended 1<sup>st</sup> medical appointment.

3: The paper refers to patients “enrolled in follow-up clinical care;” authors assume this entails successful linkage to a medical professional for anti-viral treatment.

4: The paper does not specifically state the rate of referral thus 98% referral rate, based on other HepTLC data, was assumed.

5: It is assumed that due the nature of incarceration, all patients positive for HBsAg will be referred to care and 90% will be successfully linked and initiate treatment.

6: Population specific data for referral and linkage to treatment in syringe exchange sites not available; data from hepatitis C literature used to assume linkage to care and acceptance of treatment. Base-case values subjected to wide author-selected sensitivity ranges.



495 Table S8: Screening program effectiveness of referral and linkage to vaccination, by population

| Population and Intervention                               | Base-Case (%) | Lower Limit (%)* | Upper Limit (%)* | Ref        |
|-----------------------------------------------------------|---------------|------------------|------------------|------------|
| <b>All Populations and Interventions</b>                  |               |                  |                  |            |
| Acceptance of Screening for Anti-HBs                      | 70.0          | 40.0             | 100.0            | 15         |
| <b>Asian and Pacific Islander Population / SFHBF</b>      |               |                  |                  |            |
| Refer to Medical Care                                     | 100.0         | 73.5             | 100.0            | 70         |
| Linked to Medical Care <sup>1</sup>                       | 69.0          | 52.0             | 86.0             | 70         |
| Accept and receive 1 <sup>st</sup> dose of vaccine        | 52.0          | 39.0             | 65.0             | 70         |
| 2 <sup>nd</sup> dose of vaccine received <sup>2</sup>     | 50.0          | 25.0             | 75.0             | Assumption |
| 3 <sup>rd</sup> dose of vaccine received                  | 49.0          | 44.0             | 74.0             | 70         |
| <b>Africa Born Population / SFHBF</b>                     |               |                  |                  |            |
| Refer to Medical Care                                     | 100.0         | 73.5             | 100.0            | 70         |
| Linked to Medical Care <sup>1</sup>                       | 69.0          | 52.0             | 86.0             | 70         |
| Accept and receive 1 <sup>st</sup> dose of vaccine        | 52.0          | 39.0             | 65.0             | 70         |
| 2 <sup>nd</sup> dose of vaccine received <sup>2</sup>     | 50.0          | 25.0             | 75.0             | Assumption |
| 3 <sup>rd</sup> dose of vaccine received                  | 49.0          | 44.0             | 74.0             | 70         |
| <b>Refugee Population / SFHBF</b>                         |               |                  |                  |            |
| Refer to Medical Care                                     | 100.0         | 73.5             | 100.0            | 70         |
| Linked to Medical Care <sup>1</sup>                       | 69.0          | 52.0             | 86.0             | 70         |
| Accept and receive 1 <sup>st</sup> dose of vaccine        | 52.0          | 39.0             | 65.0             | 70         |
| 2 <sup>nd</sup> dose of vaccine received <sup>2</sup>     | 50.0          | 25.0             | 75.0             | Assumption |
| 3 <sup>rd</sup> dose of vaccine received                  | 49.0          | 44.0             | 74.0             | 70         |
| <b>Incarcerated Population / Universal Screening</b>      |               |                  |                  |            |
| Refer to Medical Care <sup>3</sup>                        | 100.0         | 75.0             | 100.0            | Assumption |
| Linked to Medical Care <sup>3</sup>                       | 90.0          | 67.5             | 100.0            | Assumption |
| Accept and receive 1 <sup>st</sup> dose of vaccine        | 70.0          | 40.0             | 100              | 77,78      |
| 2 <sup>nd</sup> dose of vaccine received <sup>4</sup>     | 65.0          | 49.0             | 81.0             | Assumption |
| 3 <sup>rd</sup> dose of vaccine received <sup>4</sup>     | 60.0          | 45.0             | 75.0             | Assumption |
| <b>Persons Who Inject Drugs / Needle Exchange Clinics</b> |               |                  |                  |            |
| Refer to Medical Care <sup>5</sup>                        | 98.0          | 73.5             | 100.0            | 74         |
| Linked to Medical Care <sup>5</sup>                       | 45.6          | 34.2             | 57.0             | 74         |
| Accept and receive 1 <sup>st</sup> dose of vaccine        | 69.0          | 52.0             | 86.0             | 79         |
| 2 <sup>nd</sup> dose of vaccine received                  | 53.0          | 40.0             | 67.0             | 79         |
| 3 <sup>rd</sup> dose of vaccine received                  | 40.0          | 30.0             | 50.0             | 79         |
| <b>Men who Have Sex with Men / STI Clinics</b>            |               |                  |                  |            |
| Refer to Medical Care <sup>5</sup>                        | 98.0          | 73.5             | 100.0            | 74         |
| Linked to Medical Care <sup>5</sup>                       | 45.6          | 34.2             | 57.0             | 74         |
| Accept and receive 1 <sup>st</sup> dose of vaccine        | 62.6          | 47.0             | 78.0             | 95         |
| 2 <sup>nd</sup> dose of vaccine received                  | 50.8          | 38.0             | 64.0             | 95         |
| 3 <sup>rd</sup> dose of vaccine received                  | 35.0          | 26.0             | 43.0             | 95         |

\*Author selected ranges of +/- 25% of base-case value.

HBsAg= Hepatitis B Surface Antigen; HepTLC = Hepatitis Testing and Linkage to Care initiative; SFHBF = San Francisco Hepatitis B Free initiative; STI = Sexually Transmitted Infections; Ref = References

- 1: The paper refers to patients “enrolled in follow-up clinical care;” authors assume this entails successful linkage to a medical professional for anti-viral treatment.
- 2: Data for completion of two doses not presented in paper; consistent with literature, authors assumed a reduction in completion in second dose compared to first.
- 3: It is assumed that due the nature of incarceration, all patients positive for HBsAg will be referred to care and 90% will be successfully linked and initiate treatment.
- 4: Given that the incarcerated individuals will be stationary with scheduled care, it is assumed that vaccine completion rates, once accepted will be high. A reduction in second and third dose completion is modeled for patients who may choose not to complete the series.
- 5: Population specific data for referral and linkage to treatment not available; HepTLC data used for referral and link to care.

496  
497  
498  
499  
500  
501  
502  
503  
504  
505  
506  
507  
508  
509  
510  
511  
512  
513  
514  
515  
516

#### 4. Transition probabilities and risk reduction with chronic hepatitis B treatment

##### A. Chronic hepatitis B with treatment

The goals of treatment of chronic hepatitis B with anti-viral medicines is to increase the probability of transitioning from active hepatitis B to inactive state by reducing DNA replication and normalizing ALT levels, as well as to increase seroconversion rate of HBeAg+ to HBeAg-.<sup>96,97</sup> The desired outcome of HBsAg clearance is rare with therapy.<sup>96,98</sup> As a result of lower levels of HBV DNA and seroconversion to HBeAg-, other benefits of therapy include reduction in incidence of cirrhosis, hepatic decompensation, and hepatocellular carcinoma.<sup>99-105</sup> Transition to inactive hepatitis B, including HBeAg seroconversion is higher in the first year of nucleos(t)ide treatment, but continues with ongoing therapy, albeit at a decreased rate.<sup>106</sup>

In this study, success of therapy is defined transitioning to inactive state of hepatitis B. For HBeAg+ patients this entails undetectable DNA, normal ALT and HBeAg loss in a given year of treatment. For HBeAg- patients, treatment success will be indicated by undetectable DNA and ALT normalization after 1 year of therapy. For entecavir and tenofovir, in both treatment naïve and lamivudine-experienced patients, data on efficacy (transitioning from active to inactive states and loss of HBsAg), were collected from clinical trials, follow up post-market studies, and other published literature including economic studies.<sup>6,107-119</sup> Clinical data show that response to therapy is higher in the first year of treatment (Table S9) compared to subsequent years (Table S10). Annual probabilities for efficacy and resistance were calculated using data from clinical trials and post-market studies per the methods described above.

517 Table S9: Transition probabilities with anti-viral treatment, year 1

| Source State                                                                                                                                          | Target State                        | Base-Case (%) | Lower Limit (%) | Upper Limit (%) | Ref |
|-------------------------------------------------------------------------------------------------------------------------------------------------------|-------------------------------------|---------------|-----------------|-----------------|-----|
| <b>Tenofovir, Treatment Naïve, Year 1</b>                                                                                                             |                                     |               |                 |                 |     |
| HBeAg+, Active CHB, Non-Cirrhotic                                                                                                                     | HBeAg-, Inactive CHB, Non-Cirrhotic | 21.0          | 10.5            | 31.5            | 107 |
| HBeAg+, Active CHB, Cirrhotic                                                                                                                         | HBeAg-, Inactive CHB, Cirrhotic     | 21.0          | 10.5            | 31.5            | 107 |
| HBeAg-, Active CHB, Non-Cirrhotic                                                                                                                     | HBeAg-, Inactive CHB, Non-Cirrhotic | 76.0          | 38.0            | 100.0           | 107 |
| HBeAg-, Active CHB, Cirrhotic                                                                                                                         | HBeAg-, Inactive CHB, Cirrhotic     | 76.0          | 38.0            | 100.0           | 107 |
| HBeAg-, Inactive CHB, Non-Cirrhotic                                                                                                                   | Anti-HBs, Non-Cirrhotic             | 1.80          | 0.90            | 2.70            | 107 |
| HBeAg-, Inactive CHB, Cirrhotic                                                                                                                       | Anti-HBs, Cirrhotic                 | 1.80          | 0.90            | 2.70            | 107 |
| Discontinuation rate <sup>1</sup>                                                                                                                     |                                     | 3.50          | 1.75            | 5.25            | 109 |
| <b>Tenofovir, Treatment Experienced, Year 1</b>                                                                                                       |                                     |               |                 |                 |     |
| HBeAg+, Active CHB, Non-Cirrhotic                                                                                                                     | HBeAg-, Inactive CHB, Non-Cirrhotic | 21.0          | 10.5            | 31.5            | 107 |
| HBeAg+, Active CHB, Cirrhotic                                                                                                                         | HBeAg-, Inactive CHB, Cirrhotic     | 21.0          | 10.5            | 31.5            | 107 |
| HBeAg-, Active CHB, Non-Cirrhotic                                                                                                                     | HBeAg-, Inactive CHB, Non-Cirrhotic | 76.0          | 38.0            | 100.0           | 107 |
| HBeAg-, Active CHB, Cirrhotic                                                                                                                         | HBeAg-, Inactive CHB, Cirrhotic     | 76.0          | 38.0            | 100.0           | 107 |
| HBeAg-, Inactive CHB, Non-Cirrhotic                                                                                                                   | Anti-HBs, Non-Cirrhotic             | 1.0           | 0.8             | 1.3             | 107 |
| HBeAg-, Inactive CHB, Cirrhotic                                                                                                                       | Anti-HBs, Cirrhotic                 | 1.0           | 0.8             | 1.3             | 107 |
| Discontinuation rate <sup>1</sup>                                                                                                                     |                                     | 3.50          | 1.75            | 5.25            | 109 |
| <b>Entecavir, Treatment Naïve, Year 1</b>                                                                                                             |                                     |               |                 |                 |     |
| HBeAg+, Active CHB, Non-Cirrhotic                                                                                                                     | HBeAg-, Inactive CHB, Non-Cirrhotic | 22.0          | 16.5            | 27.5            | 120 |
| HBeAg+, Active CHB, Cirrhotic                                                                                                                         | HBeAg-, Inactive CHB, Cirrhotic     | 22.0          | 16.5            | 27.5            | 120 |
| HBeAg-, Active CHB, Non-Cirrhotic                                                                                                                     | HBeAg-, Inactive CHB, Non-Cirrhotic | 78.0          | 58.5            | 97.5            | 119 |
| HBeAg-, Active CHB, Cirrhotic                                                                                                                         | HBeAg-, Inactive CHB, Cirrhotic     | 78.0          | 58.5            | 97.5            | 119 |
| HBeAg-, Inactive CHB, Non-Cirrhotic                                                                                                                   | Anti-HBs, Non-Cirrhotic             | 1.0           | 0.8             | 1.3             | 120 |
| HBeAg-, Inactive CHB, Cirrhotic                                                                                                                       | Anti-HBs, Cirrhotic                 | 1.0           | 0.8             | 1.3             | 120 |
| Discontinuation rate <sup>1</sup>                                                                                                                     |                                     | 5.2           | 3.9             | 6.5             | 111 |
| HBeAg+/- = Hepatitis B eAntigen positive or negative; Anti-HBs = Antibody of Hepatitis B Surface Antigen; CHB = Chronic Hepatitis B; Ref = References |                                     |               |                 |                 |     |

518

519

520 Table S10: Annual probabilities with anti-viral treatment, year 2+

| Source State                                     | Target State                        | Base-Case (%) | Lower Limit (%) | Upper Limit (%) | Ref |
|--------------------------------------------------|-------------------------------------|---------------|-----------------|-----------------|-----|
| <b>Tenofovir, Treatment Naïve, Year 2+</b>       |                                     |               |                 |                 |     |
| HBeAg+, Active CHB, Non-Cirrhotic                | HBeAg-, Inactive CHB, Non-Cirrhotic | 11.40         | 5.70            | 17.09           | 109 |
| HBeAg+, Active CHB, Cirrhotic                    | HBeAg-, Inactive CHB, Cirrhotic     | 17.60         | 8.78            | 26.33           | 109 |
| HBeAg-, Active CHB, Non-Cirrhotic                | HBeAg-, Inactive CHB, Non-Cirrhotic | 13.80         | 6.90            | 20.69           | 117 |
| HBeAg-, Active CHB, Cirrhotic                    | HBeAg-, Inactive CHB, Cirrhotic     | 13.80         | 6.90            | 20.69           | 117 |
| HBeAg-, Inactive CHB, Non-Cirrhotic              | Anti-HBs, Non-Cirrhotic             | 1.00          | 0.50            | 1.50            | 109 |
| HBeAg-, Inactive CHB, Cirrhotic                  | Anti-HBs, Cirrhotic                 | 1.00          | 0.50            | 1.50            | 109 |
| Discontinuation rate <sup>1</sup>                |                                     | 3.50          | 1.75            | 5.25            | 109 |
| <b>Tenofovir, Treatment Experienced, Year 2+</b> |                                     |               |                 |                 |     |
| HBeAg+, Active CHB, Non-Cirrhotic                | HBeAg-, Inactive CHB, Non-Cirrhotic | 11.40         | 5.70            | 17.09           | 109 |
| HBeAg+, Active CHB, Cirrhotic                    | HBeAg-, Inactive CHB, Cirrhotic     | 17.60         | 8.78            | 26.33           | 109 |
| HBeAg-, Active CHB, Non-Cirrhotic                | HBeAg-, Inactive CHB, Non-Cirrhotic | 13.80         | 6.90            | 20.69           | 117 |
| HBeAg-, Active CHB, Cirrhotic                    | HBeAg-, Inactive CHB, Cirrhotic     | 13.80         | 6.90            | 20.69           | 117 |
| HBeAg-, Inactive CHB, Non-Cirrhotic              | Anti-HBs, Non-Cirrhotic             | 1.00          | 0.50            | 1.50            | 109 |
| HBeAg-, Inactive CHB, Cirrhotic                  | Anti-HBs, Cirrhotic                 | 1.00          | 0.50            | 1.50            | 109 |
| Discontinuation rate <sup>1</sup>                |                                     | 3.50          | 1.75            | 5.25            | 109 |
| <b>Entecavir, Treatment Naïve, Year 2+</b>       |                                     |               |                 |                 |     |
| HBeAg+, Active CHB, Non-Cirrhotic                | HBeAg-, Inactive CHB, Non-Cirrhotic | 5.20          | 2.60            | 7.79            | 111 |
| HBeAg+, Active CHB, Cirrhotic                    | HBeAg-, Inactive CHB, Cirrhotic     | 5.20          | 2.60            | 7.79            | 111 |
| HBeAg-, Active CHB, Non-Cirrhotic                | HBeAg-, Inactive CHB, Non-Cirrhotic | 5.20          | 2.60            | 7.79            | 111 |
| HBeAg-, Active CHB, Cirrhotic                    | HBeAg-, Inactive CHB, Cirrhotic     | 5.20          | 2.60            | 7.79            | 111 |
| HBeAg-, Inactive CHB, Non-Cirrhotic              | Anti-HBs, Non-Cirrhotic             | 0.70          | 0.33            | 0.98            | 111 |
| HBeAg-, Inactive CHB, Cirrhotic                  | Anti-HBs, Cirrhotic                 | 0.70          | 0.33            | 0.98            | 111 |
| Discontinuation rate <sup>1</sup>                |                                     | 5.20          | 2.58            | 7.74            | 111 |

1: for PWIDs modeled as 2x baseline  
HBeAg+/- = Hepatitis B eAntigen positive or negative; Anti-HBs = Antibody of Hepatitis B Surface Antigen; CHB = Chronic Hepatitis B;  
Ref = References

521

522 B. Resistance to nucleos(t)ide therapies

523 Clinical evidence indicates that it is possible to develop resistance to nucleos(t)ide therapies leading  
524 to treatment failure, which may result in progression liver disease due to CHB.<sup>121</sup> With the exception  
525 of tenofovir, resistance to other anti-viral drugs has been seen observed in clinical trials and long-  
526 term post-market studies.<sup>3,116,117,122-125</sup> The risk of developing resistance increases with increase  
527 duration of therapy, as observed with lamivudine and entecavir.<sup>3,108,115,116,126</sup> Furthermore, risk of  
528 cross-resistance is higher for patients who may have failed another nucleos(t)ide therapy and  
529 response to another anti-viral with a prior treatment failure.<sup>3,110</sup> For this model, based on the  
530 available clinical data, annual probability of developing resistance, based on treatment naïve or  
531 experienced status was portrayed. When applicable, the risk of developing resistance will increase  
532 per year for the first five years of therapy, followed by constant annual probability equal to year 5 of  
533 treatment.<sup>3,6,117,123,124,127</sup>

534

535 *Table S11: Annual probabilities for developing resistance to nucleos(t)ide therapies*

| Therapy (patient population)                                                                                                    | Year of Treatment | Annual probability of resistance |                 |                 | Ref         |
|---------------------------------------------------------------------------------------------------------------------------------|-------------------|----------------------------------|-----------------|-----------------|-------------|
|                                                                                                                                 |                   | Base Case (%)                    | Lower Limit (%) | Upper Limit (%) |             |
| <b>Entecavir (Treatment Naïve, HBeAg+ and - patients, cirrhotic and non-cirrhotic)</b>                                          | 1                 | 0.4                              | 0.0             | 0.9             | 3,6,123     |
|                                                                                                                                 | 2                 | 0.4                              | 0.0             | 0.9             | 3,6,123     |
|                                                                                                                                 | 3                 | 0.7                              | 0.0             | 2.0             | 3,6,123     |
|                                                                                                                                 | 4                 | 0.8                              | 0.0             | 2.5             | 3,6,123     |
|                                                                                                                                 | 5+                | 0.8                              | 0.0             | 2.5             | 3,6,123     |
| <b>Tenofovir (Treatment Naïve, HBeAg+ and - patients, cirrhotic and non-cirrhotic)*</b>                                         | 1                 | 0.0                              | 0.0             | 1.0             | 117,124,127 |
|                                                                                                                                 | 2                 | 0.0                              | 0.0             | 1.2             | 117,124,127 |
|                                                                                                                                 | 3                 | 0.0                              | 0.0             | 1.4             | 117,124,127 |
|                                                                                                                                 | 4                 | 0.0                              | 0.0             | 1.6             | 117,124,127 |
|                                                                                                                                 | 5+                | 0.0                              | 0.0             | 1.8             | 117,124,127 |
| <b>Tenofovir (in treatment experienced, lamivudine resistant patients, HBeAg+ and - patients, cirrhotic and non-cirrhotic)*</b> | 1                 | 0.0                              | 0.0             | 1.2             | 117,124,127 |
|                                                                                                                                 | 2                 | 0.0                              | 0.0             | 1.4             | 117,124,127 |
|                                                                                                                                 | 3                 | 0.0                              | 0.0             | 1.6             | 117,124,127 |
|                                                                                                                                 | 4                 | 0.0                              | 0.0             | 1.8             | 117,124,127 |
|                                                                                                                                 | 5+                | 0.0                              | 0.0             | 2.0             | 117,124,127 |

\*Author assumed upper limit for annual probability to develop resistance associated variants (RAV).  
HBeAg+/-= Hepatitis B eAntigen positive or negative; Ref = References

536

537 **C. Retreatment after discontinuation or RAV development**

538 Patients may discontinue therapy for any reason according to the treatment-specific annual  
 539 probabilities listed above. Patients may also develop resistance forcing them to stop a given  
 540 therapy. For the base-case scenario, we assumed that up to 75% of the patients who discontinue  
 541 therapy may be retreated annually. If patients develop resistance to entecavir, up to 75% may be  
 542 retreated with tenofovir. If patients develop resistance to tenofovir (although not yet reported),  
 543 they will enter natural history model.

544 *Table S12: Proportion of patients retreated on an annual basis after discontinuation of therapy or development of resistance*

|                                                           | Base-Case (%) | Lower Limit (%) | Upper Limit (%) | Reference  |
|-----------------------------------------------------------|---------------|-----------------|-----------------|------------|
| <b>Discontinuation of Therapy</b>                         |               |                 |                 |            |
| Entecavir                                                 | 75            | 25              | 100             | Assumption |
| Tenofovir                                                 | 75            | 25              | 100             | Assumption |
| <b>Development of Resistance Associated Variant (RAV)</b> |               |                 |                 |            |
| Entecavir                                                 | 75            | 25              | 100             | Assumption |

545

546 **D. Probability of DNA suppression, reduction in advanced liver disease and regression of**  
 547 **cirrhosis with treatment**

548 One of the key outcomes of treatment with anti-viral drugs is a marked reduction in DNA level of  
 549 hepatitis B virus. A reduction in hepatitis B virus DNA has been linked to a reduction in development  
 550 of advanced liver disease chronic hepatitis B, particularly hepatocellular carcinoma and  
 551 cirrhosis.<sup>68,128-131</sup> Clinical studies for both tenofovir and entecavir have shown a reduction in hepatitis  
 552 B virus DNA levels within the first year of treatment.<sup>107,119,120</sup> As seen in Table S13, the DNA  
 553 reduction is dependent on HBeAg status; less HBeAg positive patients experience a DNA reduction

554 than HBeAg negative patients. And a greater number of tenofovir patients, in clinical studies,  
 555 reached undetectable DNA levels than did entecavir patients. Proportion of patients experiencing  
 556 DNA reduction in treatment year 2 and beyond were reduced by approximately 40% based on a  
 557 previously published estimate, which was varied widely in sensitivity analyses (Table S13).<sup>6</sup> During  
 558 long term (5 to 6 years) follow up of patients in clinical trials, treatment has also been shown to  
 559 reverse cirrhosis at high rates; we used data from clinical trials to estimate annual regression rates  
 560 from cirrhosis to no cirrhosis in inactive and anti-HBs states.<sup>132,133</sup>

561  
 562 Table S14 shows the relative risk reductions for progression to cirrhosis, decompensated cirrhosis,  
 563 and hepatocellular carcinoma in patients who achieve DNA suppression with treatment.<sup>6</sup> The annual  
 564 probability of regression from cirrhosis is also listed.<sup>6</sup> Patients who do not achieve DNA suppression  
 565 (per ratios listed in Table S13), will experience annual natural history transition probabilities.

566 *Table S13: Proportion of patients with suppressed hepatitis B DNA in the first year of treatment and subsequent years*

| <b>Treatment</b>                                                                                          | <b>Base-case (%)</b> | <b>Lower-Limit (%)</b> | <b>Upper-Limit (%)</b> | <b>Reference</b> |
|-----------------------------------------------------------------------------------------------------------|----------------------|------------------------|------------------------|------------------|
| <b>Year 1 of treatment</b>                                                                                |                      |                        |                        |                  |
| <b>Tenofovir</b>                                                                                          |                      |                        |                        |                  |
| <b>HBeAg(+)^</b>                                                                                          | 76.00                | 57.00                  | 95.00                  | 107              |
| <b>HBeAg(-)^</b>                                                                                          | 93.00                | 70.00                  | 1.00                   | 107              |
| <b>Entecavir</b>                                                                                          |                      |                        |                        |                  |
| <b>HBeAg(+)^</b>                                                                                          | 67.00                | 5.00                   | 84.00                  | 120              |
| <b>HBeAg(-)^</b>                                                                                          | 90.00                | 68.00                  | 1.00                   | 119              |
| <b>Year 2+ of treatment</b>                                                                               |                      |                        |                        |                  |
| <b>Ratio of year 1 probability</b>                                                                        | 62.99                | 47.24                  | 78.74                  | 6                |
| ^Author selected lower and upper limits of +/-25%.<br>HBeAg+/-= Hepatitis B eAntigen positive or negative |                      |                        |                        |                  |

567

568 Table S14: Risk reduction of advanced liver disease with suppressed hepatitis B virus DNA with treatment

| Source State                                   | Target State                        | Base Case                           | Lower Limit | Upper Limit | Ref        |
|------------------------------------------------|-------------------------------------|-------------------------------------|-------------|-------------|------------|
| <b>Progression to Cirrhosis</b>                |                                     |                                     |             |             |            |
| HBeAg+, Active CHB, Non-Cirrhotic              | HBeAg+, Active CHB, Cirrhotic       |                                     |             |             | 97         |
| HBeAg-, Active CHB, Non-Cirrhotic              | HBeAg-, Active CHB, Cirrhotic       | 0.55 (0.38-0.78) <sup>1</sup>       |             |             | 97         |
| HBeAg-, Inactive CHB, Non-Cirrhotic            | HBeAg-, Inactive CHB, Cirrhotic     |                                     |             |             | 97         |
| <b>Progression to Decompensated Cirrhosis</b>  |                                     |                                     |             |             |            |
| HBeAg+, Active CHB, Cirrhotic                  | Decompensated Cirrhosis             |                                     |             |             | 97         |
| HBeAg-, Active CHB, Cirrhotic                  | Decompensated Cirrhosis             | 0.45 (0.22-0.89) <sup>1</sup>       |             |             | 97         |
| HBeAg-, Inactive CHB, Cirrhotic                | Decompensated Cirrhosis             |                                     |             |             | Assumption |
| <b>Progression to Hepatocellular Carcinoma</b> |                                     |                                     |             |             |            |
| HBeAg+, Active CHB, Non-Cirrhotic              | Hepatocellular Carcinoma            |                                     |             |             | 6          |
| HBeAg-, Active CHB, Non-Cirrhotic              | Hepatocellular Carcinoma            | 0.5209 (0.391-0.651) <sup>1</sup>   |             |             | 6          |
| HBeAg-, Inactive CHB, Non-Cirrhotic            | Hepatocellular Carcinoma            |                                     |             |             | 6          |
| HBeAg+, Active CHB, Cirrhotic                  | Hepatocellular Carcinoma            | 0.54 (0.41-0.72) <sup>1</sup>       |             |             | 97         |
| HBeAg-, Active CHB, Cirrhotic                  | Hepatocellular Carcinoma            |                                     |             |             | 97         |
| HBeAg-, Inactive CHB, Cirrhotic                | Hepatocellular Carcinoma            |                                     |             |             | 97         |
| <b>CHB related mortality</b>                   |                                     |                                     |             |             |            |
| HBeAg+, Active CHB, Non-Cirrhotic              | Death                               |                                     |             |             | 6          |
| HBeAg-, Active CHB, Non-Cirrhotic              | Death                               | 0.1695 (0.0469-0.6098) <sup>1</sup> |             |             | 6          |
| HBeAg-, Inactive CHB, Non-Cirrhotic            | Death                               |                                     |             |             | 6          |
| HBeAg+, Active CHB, Cirrhotic                  | Death                               |                                     |             |             | 97         |
| HBeAg-, Active CHB, Cirrhotic                  | Death                               | 0.68 (0.00-0.90) <sup>1,2</sup>     |             |             | 97         |
| HBeAg-, Inactive CHB, Cirrhotic                | Death                               |                                     |             |             | 97         |
| <b>Regression of Cirrhosis</b>                 |                                     |                                     |             |             |            |
| HBeAg-, Inactive CHB, Cirrhotic                | HBeAg-, Inactive CHB, Non-Cirrhotic | 0.24                                | 0.18        | 0.30        | 132,133    |
| Anti-HBs, Cirrhotic                            | Anti-HBs, Non-Cirrhotic             | 0.24                                | 0.18        | 0.30        | 132,133    |

1: Relative risk reduction compared to natural history probability with detectable DNA

2: Author selected range

HBeAg+/- = Hepatitis B eAntigen positive or negative; Anti-HBs = Antibody of Hepatitis B Surface Antigen; CHB = Chronic Hepatitis B;

Ref = References

570 **5. Transmission probabilities**

571 Annual incidence of acute hepatitis B for each of the high-risk population groups was determined from  
 572 published literature, when available. For Africa born and refugee population, due to lack of quality and  
 573 reliable data on annual incidence of acute hepatitis B, we used a rate equivalent of high-risk Asian Pacific  
 574 Islander population.

575 *Table S15: Annual incidence of horizontal acute infection amongst susceptible adults within a population*

| Source population   | Susceptible population | Base-Case (%) annual incidence of acute hepatitis B | Lower limit (%) | Upper limit (%) | Ref                     |
|---------------------|------------------------|-----------------------------------------------------|-----------------|-----------------|-------------------------|
| FB API <sup>1</sup> | FB API                 | 0.64                                                | 0.47            | 0.81*           | <sup>134</sup>          |
| Incarcerated        | Incarcerated           | 2.31 <sup>2</sup>                                   | 0.82            | 3.80            | <sup>77</sup>           |
| PWID                | PWID                   | 10.00                                               | 8.30            | 12.20           | <sup>135,136</sup>      |
| MSM                 | MSM                    | 0.96                                                | 0.85            | 1.10            | <sup>137</sup>          |
| Africa Born         | Africa Born            | 0.64                                                | 0.47            | 0.81*           | Assumption <sup>3</sup> |
| Refugee             | Refugee                | 0.64                                                | 0.47            | 0.81*           | Assumption <sup>3</sup> |

\*Author selected upper range; the source had listed the range as 0.47 to 0.61, in which the upper range is lower than the base-case value. Authors adjusted the upper range value by the same factor as lower range value from base-case value.  
 1: Incidence rate for high-risk Asian Pacific Islander population used.  
 2: Calculated mean from min and max range.  
 3: Due to lack of quality population specific data, the annual incidence is assumed to be higher than the general population incidence rate and equivalent of high-risk Asian Pacific Islander population.  
 FB = Foreign Born; API = Asian Pacific Islander; PWID = People who inject drugs; MSM = Men who have sex with men; Ref = Reference

576

577 **6. Prevention**

578 **A. Hepatitis B vaccine**

579 Two vaccines are available, however, since there is no difference in doses, efficacy or adverse  
 580 events, we modeled “vaccine” intervention. The cost of the vaccines may differ and was modeled  
 581 accordingly using a range to cover the uncertainty. Immunity due to vaccination was assumed to  
 582 continue for life without the need for boosters.<sup>138,139</sup> Due to their rare occurrence, adverse events to  
 583 the vaccine were not modeled.<sup>16</sup>

584 **B. Vaccination effectiveness by number of doses**

585 Vaccine efficacy varies by number of doses a patient receives, as presented in the table below.

586 *Table S16: Hepatitis B vaccine effectiveness rates among those completing the 3-dose series, by number of doses*

| Number of Doses       | Base-Case (%) | Lower Limit (%)    | Upper Limit (%)    | Ref          |
|-----------------------|---------------|--------------------|--------------------|--------------|
| Efficacy with 1 Dose  | 14.50         | 13.78 <sup>^</sup> | 15.23 <sup>^</sup> | <sup>9</sup> |
| Efficacy with 2 Doses | 81.00         | 79.50              | 82.90              | <sup>9</sup> |
| Efficacy with 3 Doses | 98.10         | 93.12 <sup>^</sup> | 1.00 <sup>^</sup>  | <sup>9</sup> |

<sup>^</sup>Author calculated for +/- 25% of base-case value  
 Ref = Reference

587



588 **7. Health related quality of life: Natural history and treatment**

589 Health related quality of life was estimated using health state utility values based on a literature review  
 590 of published primary studies and economic evaluation of hepatitis B.<sup>6,7,9,10,12,13,15,16,140-148</sup> The utility  
 591 values vary widely in literature. Thus, whenever possible we relied on primary studies conducted in  
 592 hepatitis B-infected individuals.<sup>141,147</sup> For perinatal exposure and asymptomatic acute hepatitis states,  
 593 we assumed no loss of quality of life and patients would not be aware of their status nor would they feel  
 594 physical symptoms.

595 *Table S17: Health state utilities*

| Health State                         | Base case | Lower Limit | Upper Limit | Ref         |
|--------------------------------------|-----------|-------------|-------------|-------------|
| Susceptible                          | 0.99      | 0.98        | 1.00        | 15          |
| Immune                               | 0.99      | 0.98        | 1.00        | 15          |
| HBV Exposure, Perinatal              | 0.99      | 0.97        | 1.00        | Assumption* |
| Acute Hepatitis, Adult, asymptomatic | 0.99      | 0.95        | 1.00        | Assumption* |
| Acute Hepatitis, Adult, symptomatic  | 0.70      | 0.63        | 0.77        | 142         |
| Fulminant Hepatitis                  | 0.37      | 0.333       | 0.407       | 140         |
| Immune Tolerant Phase                | 0.95      | 0.84        | 1.00        | 146         |
| HBeAg+, Active CHB, Non-Cirrhotic    | 0.670     | 0.603       | 0.737       | 141         |
| HBeAg+, Active CHB, Cirrhotic        | 0.660     | 0.594       | 0.726       | 141         |
| HBeAg-, Active CHB, Non-Cirrhotic    | 0.670     | 0.603       | 0.737       | 141         |
| HBeAg-, Active CHB, Cirrhotic        | 0.660     | 0.594       | 0.726       | 141         |
| HBeAg-, Inactive CHB, Non-Cirrhotic  | 0.850     | 0.765       | 0.935       | 6           |
| HBeAg-, Inactive CHB, Cirrhotic      | 0.850     | 0.765       | 0.935       | 6           |
| Decompensated Cirrhosis              | 0.370     | 0.333       | 0.407       | 141         |
| Hepatocellular Carcinoma             | 0.430     | 0.387       | 0.473       | 141         |
| Liver Transplant                     | 0.570     | 0.513       | 0.627       | 141         |
| Post Liver Transplant                | 0.640     | 0.576       | 0.704       | 141         |
| Anti-HBs, Non-Cirrhotic              | 0.860     | 0.774       | 0.946       | 6           |
| Anti-HBs, Cirrhotic                  | 0.860     | 0.774       | 0.946       | 6           |

\*It is assumed that if patients are not aware of their infection and are not symptomatic, there would be minimal to no loss of quality of life, thus we used a utility of 0.99 to indicate near perfect health.  
 HBeAg+/- = Hepatitis B eAntigen positive or negative; Anti-HBs = Antibody of Hepatitis B Surface Antigen; CHB = Chronic Hepatitis B; Ref = References

596  
 597 **8. Utility loss with anti-viral treatment**

598 Utility loss due to adverse events with entecavir and tenofovir was calculated by weighting the frequency of  
 599 adverse events from clinical trials with the disutility weights for common and serious side-effects.<sup>107,119,120</sup>  
 600 The disutility weights are adjusted under the assumption that most patients will experience adverse at most  
 601 25% of the time.

602 *Table S18: Annual utility loss due to treatment*

| Drug      | Base Case (annual)* | Lower Limit* | Upper Limit* | Ref             |
|-----------|---------------------|--------------|--------------|-----------------|
| Entecavir | -0.029              | -0.043       | 0.000        | 111,119,120,149 |
| Tenofovir | -0.031              | -0.047       | 0.000        | 107,109         |

\* (-) represents utility loss; it does not imply a negative utility.  
 Ref = Reference

603

604 **9. Cost Inputs**

605 **A. Healthcare costs**

606 Costs related to medical management of acute and chronic hepatitis B through its natural history were  
 607 collected from economic evaluations of the disease.<sup>7,8,10,11,16,69,150-153</sup> When data for specific health states  
 608 were not available, we relied on educated and expert assumptions. For example, costs of managing  
 609 initial exposure in infants and asymptomatic acute infection in adults were assumed to be zero. The  
 610 reason is that in majority of patients with initial exposure, the acute infection is asymptomatic; and if  
 611 patients are not aware of their status, no medical care will be sought. Cost of managing patients in  
 612 inactive phase of hepatitis B was assumed to be half of the costs in active state. Cost of managing  
 613 patients following HBeAg clearance (or development of anti-HBe), was assumed to be half of the costs of  
 614 managing patients in inactive phase. HBeAg cleared patients are still at risk of developing advanced liver  
 615 diseases, including hepatocellular carcinoma, as such require continuous monitoring.<sup>45,49-53</sup> Costs in  
 616 literature are not segregated between active HBeAg positive and negative states; in this model we  
 617 assumed that the costs of management in the active phase were same, regardless of HBeAg status.

618  
 619 Further, for advanced liver disease, we assumed that cost of management would not differ significantly  
 620 that those established for advanced liver disease in hepatitis C. Advanced liver disease in this context is  
 621 considered to be cirrhosis, decompensated cirrhosis, hepatocellular carcinoma, and liver transplant  
 622 (including post-liver transplant). Therefore, we used the data for management of advanced liver  
 623 conditions from a recent hepatitis C economic evaluation.<sup>69</sup>

624  
 625 When available, confidence intervals around point estimates of costs from published sources were used.  
 626 When not available we used values of +/- 50% of the base-case estimate; however, for active and  
 627 inactive non-cirrhotic and cirrhotic states, as well as HBs cleared states, we used an interval of 50% to  
 628 300% to compensate for the variation in the point estimates observed in the literature.<sup>7,10,11,16</sup>

629  
 630 *Table S19: Hepatitis B health state costs (annual except as noted with E for episode)*

| Health State                         | Base Case (\$/year) | Lower Limit | Upper Limit | Ref                         |
|--------------------------------------|---------------------|-------------|-------------|-----------------------------|
| HBV Exposure, Perinatal              | 0                   | 0           | 622         | Assumption*                 |
| Acute Hepatitis, Adult, asymptomatic | 0                   | 0           | 622         | Assumption*                 |
| Acute Hepatitis, Adult, symptomatic  | 357                 | 185         | 622         | <sup>16</sup>               |
| Fulminant Hepatitis (E)              | 17,309              | 17,362      | 46,489      | <sup>16</sup>               |
| Immune Tolerant Phase                | 520                 | 265         | 1,059       | <sup>151</sup>              |
| HBeAg+, Active CHB, Non-Cirrhotic    | 1,293               | 647         | 3,880       | <sup>152</sup>              |
| HBeAg+, Active CHB, Cirrhotic        | 2,714               | 1,357       | 8,141       | <sup>69</sup>               |
| HBeAg-, Active CHB, Non-Cirrhotic    | 1,293               | 647         | 3,880       | <sup>152</sup>              |
| HBeAg-, Active CHB, Cirrhotic        | 2,714               | 1,357       | 8,141       | <sup>69</sup>               |
| HBeAg-, Inactive CHB, Non-Cirrhotic  | 647                 | 323         | 1,940       | Assumption <sup>^</sup>     |
| HBeAg-, Inactive CHB, Cirrhotic      | 1,357               | 678         | 4,070       | Assumption <sup>^</sup>     |
| Decompensated Cirrhosis              | 32,134              | 30,159      | 34,111      | <sup>69</sup>               |
| Hepatocellular Carcinoma             | 51,258              | 46,002      | 56,507      | <sup>69</sup>               |
| Liver Transplant (E)                 | 203,489             | 187,651     | 219,323     | <sup>69</sup>               |
| Post Liver Transplant                | 44,318              | 36,213      | 52,423      | <sup>69</sup>               |
| Anti-HBs, Non-Cirrhotic              | 323                 | 162         | 970         | Assumption <sup>&amp;</sup> |
| Anti-HBs, Cirrhotic                  | 678                 | 339         | 2,035       | Assumption <sup>&amp;</sup> |

\*Assumed that with initial asymptomatic exposure when patients are unaware of infection status, there would be no healthcare associated costs.  
<sup>^</sup>Assumed to be 50% of the costs in active phase of chronic hepatitis B.  
<sup>&</sup>Assumed to be 50% of the costs in inactive phase of chronic hepatitis B.  
 HBeAg+/- = Hepatitis B eAntigen positive or negative; Anti-HBs = Antibody of Hepatitis B Surface Antigen; CHB = Chronic Hepatitis B; Ref = Reference

631 B. Diagnostic, and monitoring tests for hepatitis B

632  
633 1. *Initial diagnostic tests, frequency of testing and related costs*

634 If HBsAg is positive, patients will be referred for medical management, which will initiate with  
635 number of baseline tests as shown in the table below. The cost of the tests was determined using  
636 clinical laboratory and physician fee schedules of Centers for Medicare and Medicaid Services.<sup>154,155</sup>

637 *Table S20: Initial diagnostic tests, frequency of testing and related costs*

| <b>Tests for Initial Evaluation</b>                                                                                                                                                                                                                     | <b>Base Case (\$/unit)</b> | <b>Lower Limit</b> | <b>Upper Limit</b> | <b>Ref</b> |
|---------------------------------------------------------------------------------------------------------------------------------------------------------------------------------------------------------------------------------------------------------|----------------------------|--------------------|--------------------|------------|
| Hepatitis B e-Antigen (HBeAg)                                                                                                                                                                                                                           | 15.70                      | 7.85               | 23.55              | 154        |
| Hepatitis B e-Antigen Antibody (anti-HBe)                                                                                                                                                                                                               | 15.76                      | 7.88               | 23.64              | 154        |
| Hepatitis B Surface Antibody (anti-HBs)                                                                                                                                                                                                                 | 14.63                      | 7.32               | 21.95              | 154        |
| Hepatitis B Core Antigen (anti-HBc)                                                                                                                                                                                                                     | 16.41                      | 8.21               | 24.62              | 154        |
| IgM Antibody to Hepatitis B Core Antigen (IgM anti-HBc)^                                                                                                                                                                                                | 16.04                      | 8.02               | 24.06              | 154        |
| Hepatitis B DNA Quantification                                                                                                                                                                                                                          | 58.35                      | 29.18              | 87.53              | 154        |
| Liver Function Tests                                                                                                                                                                                                                                    | 11.13                      | 5.57               | 16.70              | 154        |
| Complete Blood Count                                                                                                                                                                                                                                    | 10.59                      | 5.30               | 15.89              | 154        |
| Hepatitis C Virus                                                                                                                                                                                                                                       | 19.44                      | 9.72               | 29.16              | 154        |
| Hepatitis D virus                                                                                                                                                                                                                                       | 23.38                      | 11.69              | 35.07              | 154        |
| Human immunodeficiency virus                                                                                                                                                                                                                            | 18.67                      | 9.34               | 28.01              | 154        |
| Renal function panel                                                                                                                                                                                                                                    | 11.83                      | 5.92               | 17.75              | 154        |
| Alpha-fetoprotein serum (age >40, clinical decision <40)                                                                                                                                                                                                | 22.85                      | 11.43              | 34.28              | 154        |
| Ultrasound (Right Upper Quadrant ultrasound)                                                                                                                                                                                                            | 101.31                     | 50.66              | 151.97             | 155        |
| ^Patients presenting with acute hepatitis only<br>HBeAg= Hepatitis B eAntigen; Anti-HBs = Antibody to Hepatitis B Surface Antigen; Anti-HBc = Antibody to Hepatitis B Core Antigen; IgM = Immunoglobulin M; CHB = Chronic Hepatitis B; Ref = References |                            |                    |                    |            |

638  
639 2. *Tests for monitoring for patients with or without ongoing treatment, frequency of testing and related costs*

640  
641 Patients who are linked to care, and are being treated with antiviral drugs will be monitored  
642 using the following tests at regular intervals. Patients who are not undergoing treatment or have  
643 completed treatment but remain in care will be monitored at regular intervals using the  
644 indicated tests.

645 The frequency of tests is determined by clinical experience; the cost of the tests was determined  
646 using clinical laboratory and physician fee schedules of Centers for Medicare and Medicaid  
647 Services.<sup>154,155</sup>

648 *Table S21: Tests for monitoring treatment, frequency of testing and related costs*

| Test for monitoring                        | No treatment (#/year) | With treatment (#/year) | Base Case (\$/unit) | Lower Limit | Upper Limit | Ref |
|--------------------------------------------|-----------------------|-------------------------|---------------------|-------------|-------------|-----|
| Hepatitis B e-Antigen (HBeAg)              | 0                     | 2                       | 15.70               | 7.85        | 23.55       | 154 |
| Hepatitis B e-Antigen Antibody (anti-HBe)  | 0                     | 2                       | 15.76               | 7.88        | 23.64       | 154 |
| Hepatitis B Surface Antigen <sup>^</sup>   | 0                     | 1                       | 14.07               | 7.04        | 21.11       | 154 |
| Hepatitis B Surface Antibody (anti-HBs)*   | 0                     | 1                       | 14.63               | 7.32        | 21.95       | 154 |
| Hepatitis B DNA Quantification             | 2                     | 4                       | 58.35               | 29.18       | 87.53       | 154 |
| Liver Function Tests                       | 2                     | 4                       | 11.13               | 5.57        | 16.70       | 154 |
| Complete Blood Count                       | 0                     | 1                       | 10.59               | 5.30        | 15.89       | 154 |
| Renal function panel                       | 0                     | 4                       | 11.83               | 5.92        | 17.75       | 154 |
| Bone density scan/DEXA (Tenofovir therapy) | 0                     | Q3 years                | 45.37               | 22.69       | 68.06       | 155 |
| Alpha-Fetoprotein Serum                    | 2                     | 2                       | 22.85               | 11.43       | 34.28       | 154 |
| Ultrasound (RUQ ultrasound)                | 2                     | 2                       | 101.31              | 50.66       | 151.97      | 155 |

<sup>^</sup>Seroconverted patients only  
<sup>\*</sup>One time only test, only on HBsAg loss  
HBeAg= Hepatitis B eAntigen; anti-HBe= Antibody to Hepatitis B eAntigen; Anti-HBs = Antibody to Hepatitis B Surface Antigen; Anti-HBc = Antibody to Hepatitis B Core Antigen; IgM = Immunoglobulin M; CHB = Chronic Hepatitis B; RUQ = Right Upper Quadrant; Q3 years = Every 3 Years; Ref = References

649

650 **C. Costs of screening strategies**

651

652

653

654

655

656

657

658

659

660

661

662

663

664

665

666

667

The model takes into account total cost per person for administration of a given strategy, plus cost of screening tests, vaccines and medicines according to costs listed elsewhere in this document. The administration costs include human resources to manage the program, cost to administer the initial screening test, and advertising (e.g. printed materials/flyers and other adverts) for recruiting, as applicable, by each type of program. However, if program specific costs were not available we used per person costs per screening from similar program categories reported in literature.<sup>89</sup> The modeled programs can be generally categorized into the following categories: 1) community clinic program (for incarcerated persons and MSM outreach via prison clinics and sexually transmitted infection clinics, respectively); 2) community outreach program (for PWID outreach via syringe exchange sites); 3) Community outreach and partnership program (for outreach and linkage to care via HepTLC program); and 4) community outreach and clinic program (San Francisco Hepatitis B Free program). From the published program costs, we subtracted the cost of the hepatitis B screening tests to estimate the administrative costs of the program. The administrative costs were then adjusted to 2016 dollars using the medical component of the Consumer Price Index (**Table 31**). To test the potential uncertainty in our estimates program costs, the values were varied widely from 75% to 300% of the base-case values.

668

669

670

671

Total cost for each modeled program include administrative costs (as reported in table below), cost of initial screening test (either HBsAg or anti-HBs), cost of full set of tests when referred to care, cost of vaccine or treatment, and cost of lifetime management of hepatitis B, with or without treatment or vaccination.

672

673 Table S22: Administrative costs of screening programs

| Cost Component by Screening Program <sup>1</sup> | Base-Case (USD, Cost/person) | Lower Limit (USD) <sup>^</sup> | Upper Limit (USD) <sup>^</sup> | Ref |
|--------------------------------------------------|------------------------------|--------------------------------|--------------------------------|-----|
| Vaccine Administration                           |                              |                                |                                |     |
| All programs                                     | 16                           | 12                             | 48                             | 134 |
| Program Administration                           |                              |                                |                                |     |
| HepTLC <sup>2</sup>                              | 178                          | 134                            | 534                            | 89  |
| SFHBF <sup>3</sup>                               | 140                          | 105                            | 420                            | 89  |
| Prison based clinic <sup>4</sup>                 | 27                           | 20                             | 81                             | 89  |
| Syringe Exchange Sites <sup>5</sup>              | 97                           | 73                             | 291                            | 89  |
| Incentive Pay <sup>6</sup>                       | 15                           | 10                             | 45                             | 79  |
| STI Clinics <sup>4</sup>                         | 27                           | 20                             | 81                             | 89  |

<sup>^</sup>Author selected ranges of 75% to 300% of base-case.  
HepTLC = Hepatitis Testing and Linkage to Care initiative; SFHBF = San Francisco Hepatitis B Free initiative; STI = Sexually Transmitted Infections; USD = United States Dollars; Ref = References

1: All cost inflation adjusted to 2016 using medical component of Consumer Price Index. Costs rounded to the nearest whole dollar.  
2: Community outreach and partnership model costs applied  
3: Community outreach and clinic model costs applied, author calculated from study data by adding separate costs of community outreach and clinic model.  
4: Clinic model costs applied  
5: Community outreach model costs applied  
6: Incentive pay applied to the first screening visit for screened patients; and for each subsequent vaccine visit for patients requiring vaccination.

674

675 D. Treatment and vaccines related costs

676 1. Treatment (drug) costs

677 Wholesale acquisition price (WAC) from Red Book Online is used for cost of drugs.<sup>156</sup> The base-case cost  
678 will be set at 80% of listed WAC price with confidence bounds of 50% to 100% for sensitivity analyses.  
679 The 80% of WAC for base-case is selected because it is likely that most, if not all payers, receive  
680 discounts from the listed retail cost.<sup>157</sup> The upper bound of the sensitivity analyses is equal to the retail  
681 cost listed in RedBook as it is unlikely that payers would acquire the drugs for a price greater than the  
682 WAC. Other prices, such as discounted prices for certain payers may also be modeled in scenario  
683 analyses.

684

685 Table S23: Cost of treatments

| Drug      | Dose/day | Base Case (\$/month) <sup>†</sup> | Lower Limit <sup>‡</sup> | Upper Limit <sup>‡</sup> | Ref |
|-----------|----------|-----------------------------------|--------------------------|--------------------------|-----|
| Entecavir | 0.5 mg   | 560                               | 350                      | 700                      | 156 |
| Tenofovir | 300 mg   | 798                               | 499                      | 998                      | 156 |

<sup>†</sup>80% of Wholesale Acquisition Cost (WAC) monthly cost from RedBook online.  
<sup>‡</sup>Lower limit is set at 50% of WAC monthly cost from RedBook online; upper limit is set equal to the WAC monthly cost from RedBook online.  
Ref = References

686

2. Vaccination costs

Costs for adult and pediatric vaccine formulations will be modeled as this model will be analyzing strategies to prevent hepatitis B infections in high-risk adult populations through immunization and in infants through vaccination and post-exposure prophylaxis.

Table S24: Cost of hepatitis B vaccines

| Vaccine                                                                                                                                                                                                                                     | # of injections | Base Case (\$/unit) † | Lower Limit‡ | Upper Limit ‡ | Ref            |
|---------------------------------------------------------------------------------------------------------------------------------------------------------------------------------------------------------------------------------------------|-----------------|-----------------------|--------------|---------------|----------------|
| Adult                                                                                                                                                                                                                                       | 3               | 42.00                 | 26.25        | 52.50         | <sup>156</sup> |
| †80% of Wholesale Acquisition Cost (WAC) monthly cost from RedBook online.<br>‡Lower limit is set at 50% of WAC monthly cost from RedBook online; upper limit is set equal to the WAC monthly cost from RedBook online.<br>Ref = References |                 |                       |              |               |                |

3. Annual cost of treatment related adverse events

Annual cost of medical management of adverse events are calculated by weighting the frequency of common and serious adverse events observed in clinical trials<sup>107,109,111,119,120,149</sup> to which published costs of similar adverse events were applied.<sup>158</sup>

Table S25: Annual cost of medical management of treatment related adverse events

| Drug                                                                                                                                                                                                                                                                                                                                     | Base case (\$/year) † | Lower Limit‡ | Upper Limit‡ | Ref        |
|------------------------------------------------------------------------------------------------------------------------------------------------------------------------------------------------------------------------------------------------------------------------------------------------------------------------------------------|-----------------------|--------------|--------------|------------|
| Entecavir                                                                                                                                                                                                                                                                                                                                | 658                   | 329          | 987          | Calculated |
| Tenofovir                                                                                                                                                                                                                                                                                                                                | 732                   | 366          | 1,098        | Calculated |
| †Based on cost of serious adverse events of \$2,801 and cost of common adverse events of \$534. Costs are weighted by frequency of serious and common adverse events and summed to calculate the costs in the table.<br>‡The lower and upper bounds for sensitivity analyses are set at 50%-150% of base case value.<br>Ref = References |                       |              |              |            |

10. Sensitivity analyses methods

A. One-way sensitivity analyses

In one-way sensitivity analyses, each input is varied across the lower and upper limits, one-by-one and results noted in terms of the effect on the cost-effectiveness ratio. In other words, the base-case value is substituted with the lower value of the input estimate and the model is run to get an ICER; same is done for the upper limit. The inputs that have the greatest impact on the ICER, relative to the base-case scenario, are considered to be the most sensitivity for model results. These are then presented in a tornado-diagram – a graph that orders the input values from the most sensitive to the least sensitive from top to bottom.

B. Probabilistic (multi-way) sensitivity analyses

In probabilistic analyses, all variables are simultaneously varied using defined distributions for each variable and the model is run to get an ICER. In our model, we conducted 10,000 simulations. We use normal distribution (with mean and standard deviation) for costs and triangular distributions (with a mode, lower and upper limits) for probabilities and proportions. The results are presented in cost-effectiveness acceptability curves for each strategy, by population, indicating at what dollar threshold is a given strategy consider to be ‘acceptable.’ For triangular distributions in this model, the base-case (point-estimate) value is the triangular mode, and lower and upper limits of the input values are the lower/upper limits of the triangular distribution, respectively.

717

### III. Model Calibration and Validation

718

#### 1. Calibration and Validation of Natural History Model

719

The chronic hepatitis B natural history Markov model was calibrated using epidemiology data for transitioning from immune tolerant phase to active chronic hepatitis B and for outcomes of three major complications of CHB – cirrhosis, hepatocellular carcinoma, and liver decompensation. REVEAL-HBV, a large longitudinal study in Taiwan on hepatitis B, provided data for the 48-year cumulative incidence of cirrhosis and hepatocellular carcinoma (HCC) in patients with chronic hepatitis B; <sup>128</sup> and for decompensation 5-year cumulative probability data provided by American Association for the Study of Liver Diseases (AASLD) was used. To validate, epidemiology data was matched with model outcomes; to do this the natural history model was run for 100,000 trials (using microsimulations) for 48-year or 5-year time-horizons, depending on outcome of interest.

727

728

#### 1. Progression to active chronic hepatitis B from immune tolerant phase

729

Based on available data and expert hepatologist input, the model was calibrated to ensure that majority of the patients in the immune tolerant phase would transition into active, non-cirrhotic, chronic hepatitis B by age 40. **Table 40** lists the probabilities used to meet this target. The calibration was based on epidemiological findings that majority of patients will transition into active hepatitis B between the ages of 20 and 40, based on genotype of hepatitis B virus.<sup>1,2</sup> In our model, 50% of patients transition into active CHB by age 21, and 100% transition to active CHB by age 37 (**Supplement A, Figure 5**).

735

736

Table S26: Age dependent transitions from Immune Tolerant to Immune Active Phase

| Age | Transition to CHB (%) | Age | Transition to CHB (%) | Age | Transition to CHB (%) |
|-----|-----------------------|-----|-----------------------|-----|-----------------------|
| 0   | 0.00                  | 19  | 8.21                  | 38  | 46.11                 |
| 1   | 0.00                  | 20  | 9.40                  | 39  | 48.95                 |
| 2   | 0.01                  | 21  | 10.67                 | 40  | 51.87                 |
| 3   | 0.04                  | 22  | 12.04                 | 41  | 54.87                 |
| 4   | 0.10                  | 23  | 13.50                 | 42  | 57.93                 |
| 5   | 0.19                  | 24  | 15.05                 | 43  | 61.07                 |
| 6   | 0.33                  | 25  | 16.69                 | 44  | 64.28                 |
| 7   | 0.51                  | 26  | 18.43                 | 45  | 67.56                 |
| 8   | 0.75                  | 27  | 20.25                 | 46  | 70.90                 |
| 9   | 1.05                  | 28  | 22.17                 | 47  | 74.31                 |
| 10  | 1.42                  | 29  | 24.18                 | 48  | 77.78                 |
| 11  | 1.85                  | 30  | 26.27                 | 49  | 81.32                 |
| 12  | 2.36                  | 31  | 28.45                 | 50  | 84.91                 |
| 13  | 2.95                  | 32  | 30.72                 | 51  | 88.56                 |
| 14  | 3.61                  | 33  | 33.08                 | 52  | 92.26                 |
| 15  | 4.36                  | 34  | 35.52                 | 53  | 96.02                 |
| 16  | 5.19                  | 35  | 38.05                 | 54  | 99.84                 |
| 17  | 6.11                  | 36  | 40.65                 | 55  | 100.00                |
| 18  | 7.12                  | 37  | 43.34                 | 56+ | 100.00                |

737

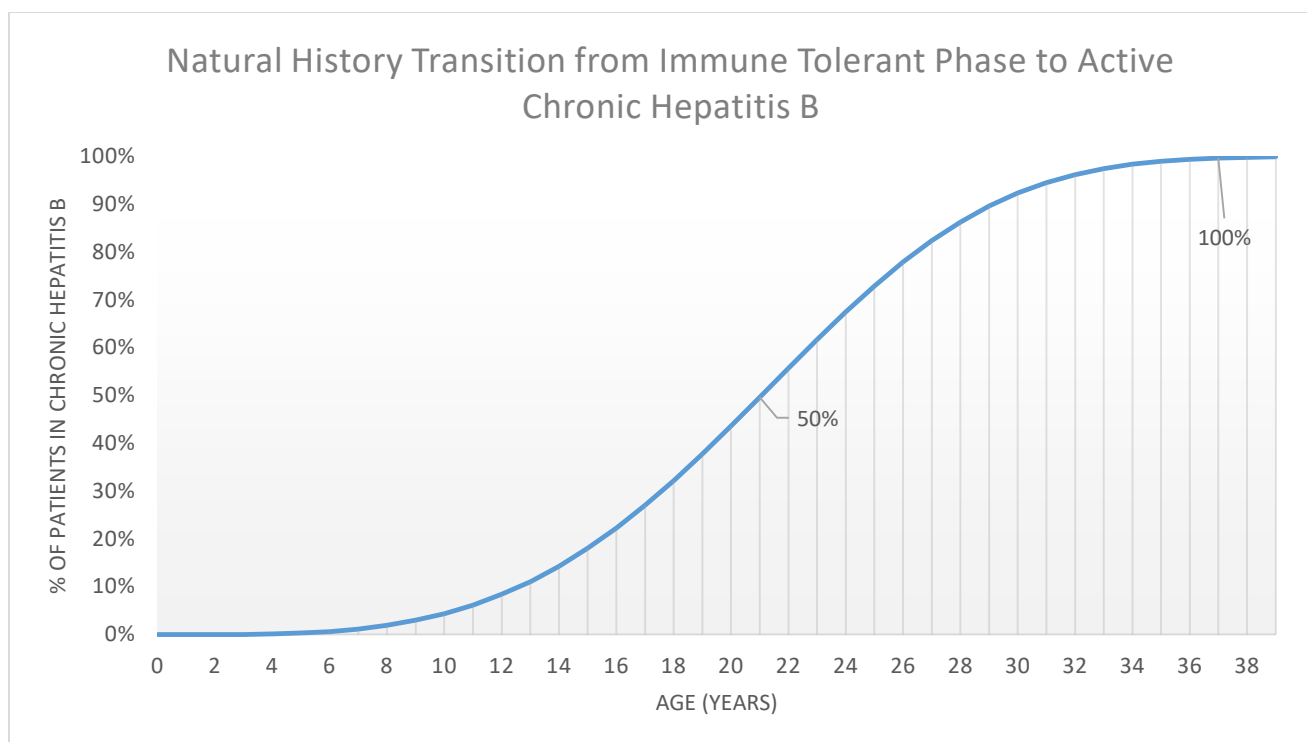

738

739 *Figure S6: Percent of patients transitioning from immune tolerant phase to chronic hepatitis B*

740

741 2. Development of cirrhosis and HCC:

742

743 As seen in



744 **Table S27**, REVEAL-HBV data are very closely related to model outcomes of cirrhosis and HCC. In the  
745 REVEAL-HBV study, the cumulative probability of cirrhosis and hepatocellular carcinoma over a 48-year  
746 period were 41.5 and 21.7, respectively. In this model, the cumulative probabilities after 25,000  
747 simulations, over a 48-year period were 42 and 22 for cirrhosis and HCC respectively.

748 Further, **Supplement Table S28 and Figure S7** show the model outcomes for cirrhosis and HCC in 5-year  
749 increments. Figure S8 shows graphs of cumulative probability of cirrhosis and liver cancer from the  
750 REVEAL-HBV study. The cumulative probability curves of HCC in the REVEAL study indicates slower  
751 development at earlier ages and increased incidence at older ages (**Figure 8a**). This trend is not  
752 replicated by the model, which is parameterized for annual incidence regardless of age or other factors  
753 that may affect development of HCC.<sup>129</sup> Given the lack of data to fit an exponential model, we opted to  
754 use a linear approach to approximating incidence of HCC. This approach is consistent with previous  
755 published economic evaluation studies.<sup>6,12,15,159</sup> Comparatively, with the cumulative probability line in  
756 the REVEAL-HBV (**Figure 8**) and line produced by this model (**Figure 7**), it is observed that development  
757 of cirrhosis seems to follow a linear progression (**Figure 8b**).

758

759 Table S27: CHB natural history model validation for cirrhosis and HCC with REVEAL-HBV study

| REVEAL-HBV Data (Chen 2011)                          |                          | This Model              |
|------------------------------------------------------|--------------------------|-------------------------|
| Location                                             | Taiwan                   | Inputs and Results      |
| N                                                    | 3653                     | N/A                     |
| Age                                                  | 30 to 65 years           | 30 years (starting age) |
| HBeAg+                                               | 565 (15.5)               | 15.5                    |
| HBeAg-                                               | 3088 (84.5)              | 84.5                    |
| Time Horizon                                         | Calculated over 48 years | 48-year model run       |
| Cumulative Probabilities (outcomes)                  |                          |                         |
| Cirrhosis                                            | 41.50                    | 42                      |
| Liver Cancer                                         | 21.70                    | 22                      |
| HBeAg-/+ = Hepatitis B eAntigen negative or positive |                          |                         |

760

761 Table S28: Results of 25,000 natural history model simulations over varying time-horizons

| CHB Complication         | Number of Years after Entry into Natural History Model and Model Outcomes |    |    |    |    |    |    |    |    |     |    |
|--------------------------|---------------------------------------------------------------------------|----|----|----|----|----|----|----|----|-----|----|
|                          | 5-years                                                                   | 10 | 15 | 20 | 25 | 30 | 35 | 40 | 45 | 48* | 50 |
| Compensated Cirrhosis    | 10                                                                        | 18 | 25 | 29 | 33 | 36 | 38 | 40 | 42 | 42  | 42 |
| Hepatocellular Carcinoma | 3                                                                         | 6  | 9  | 12 | 14 | 16 | 18 | 19 | 21 | 22  | 22 |

\*Corresponds to REVEAL-HBV study data for cumulative probabilities.  
CHB = Chronic Hepatitis B

762

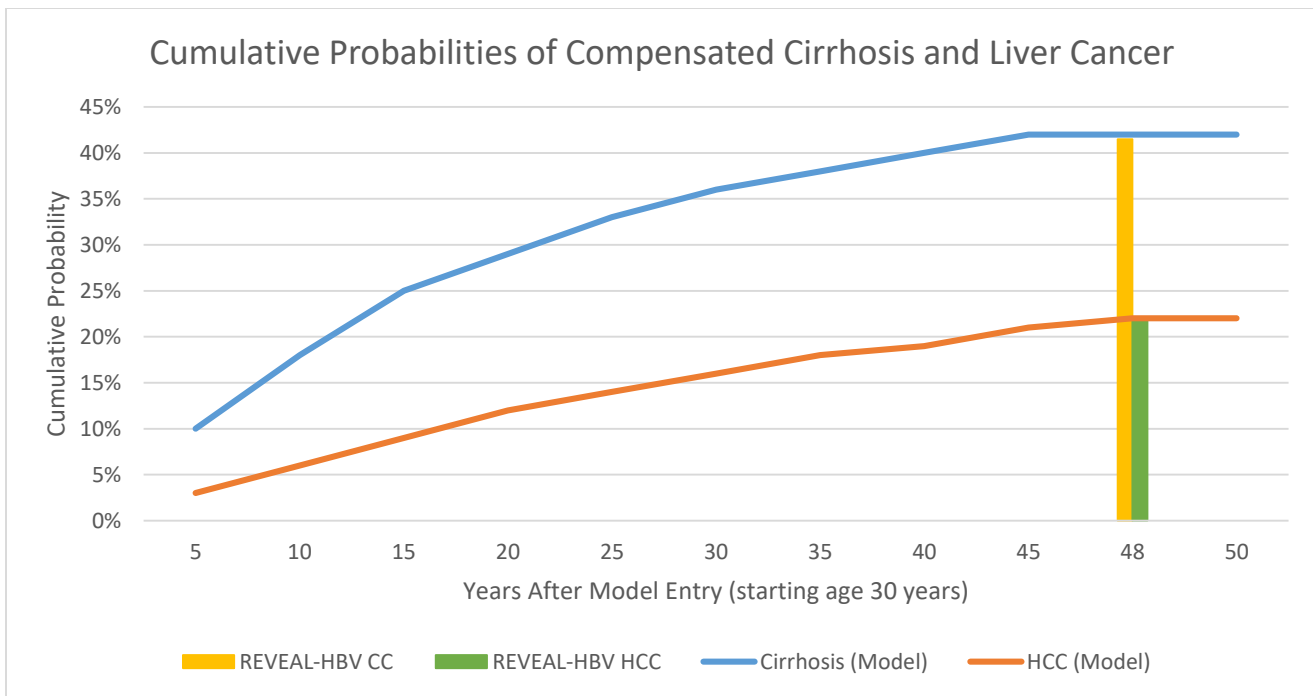

763

764 Figure S7: Cumulative probabilities of cirrhosis and HCC in the natural history model and epidemiology data

765 Supplement Figure 7 caption: The figure shows results of the natural history model in five-year increments. The  
766 results were generated using 25,000 microsimulations of the model. Cirrhosis cumulative probability is show in

767 blue line, with the height of the yellow vertical bar (41.5) showing epidemiology data from REVEAL-HBV. The  
768 orange line shows the cumulative probability of developing liver cancer, with the height of the green bar (21.7)  
769 indicating cumulative probability from the REVEAL-HBV study.

770

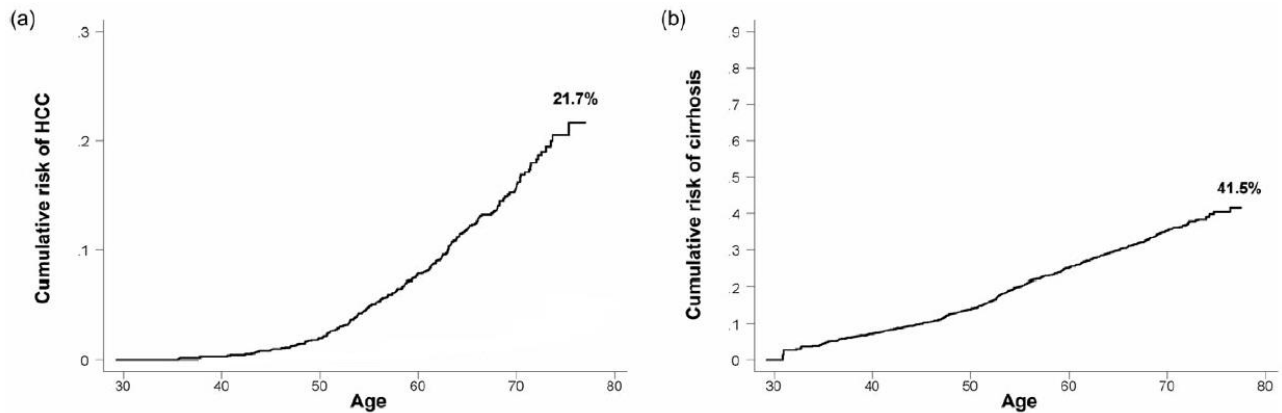

771

772 *Figure S8: Cumulative probabilities graphs from REVEAL-HBV study*

773 *Supplement Figure 8 caption: reproduced from Chen, et al. 2011 (REVEAL-HBV) with slight modification to*  
774 *remove a non-relevant line from the graph (a). The graphs show cumulative probability of hepatocellular*  
775 *carcinoma (HCC, graph (a)) and cirrhosis (graph (b)).*

776 3. Development of liver decompensation:

777

778 The natural history model was validated for decompensated cirrhosis by matching epidemiology data  
779 with cumulative probability of incidence of decompensation amongst CHB cirrhotic patients.

780

781 Epidemiology data: amongst patients with cirrhosis, the cumulative probability of develop liver  
782 decompensation is 20.<sup>97</sup> We ran the model with a cirrhotic cohort of 50 HBeAg(+) and 50 HBeAg(-) for  
783 25,000 simulations for a time-horizon of 5 years. The model result was 18 cumulative probability of  
784 decompensation over a 5-year period, closely correlated with epidemiological data.

785

786 Conclusion of model validation: Overall, the model predictions of the outcome of the three major CHB  
787 complications (cirrhosis, hepatocellular carcinoma and liver decompensation) are closely aligned with the  
788 epidemiological data. And transition of patients from immune tolerant to immune active phase is depicted  
789 appropriately according to natural history data.

790

791  
792  
793  
794  
795  
796  
797  
798  
799  
800  
801

## 2. Validation of Treatment Model

To determine how our treatment model compares with the calibrated natural history model, we ran 100,000 microsimulations to determine clinical outcomes for an active chronic hepatitis B prevalent cohort. Data from observational and clinical trials show that chronic hepatitis B outcomes of cirrhosis, decompensation, hepatocellular carcinoma and death can be reduced, but not completely eliminated, with anti-viral therapy.<sup>97,160-168</sup> The estimates of percent reduction in outcomes, however, are not well defined with wide ranges reported in literature from no difference to 30 to 80% reduction in cirrhosis, decompensation and liver cancer.<sup>97,163,165</sup> When available, we used data published by American Association for the Study of Liver Disease to model relative risk reductions in development of cirrhosis, decompensation, hepatocellular carcinoma, and CHB related death.<sup>97</sup> In other instances, data from a previously published hepatitis B economic evaluation were used.<sup>6</sup>

802  
803  
804  
805  
806  
807  
808  
809  
810  
811

We compared treatment with tenofovir with no intervention to determine the *reduction of key clinical outcomes* with treatment. For the purposes of validation test, we assumed complete adherence to treatment and complete suppression of HBV DNA. Relevant cohort and treatment characteristics for the validation test are shown in the **Supplement Table 29** below. The clinical outcomes measured were development of 1) compensated cirrhosis; 2) decompensated cirrhosis; 3) hepatocellular carcinoma from all CHB health states; 4) hepatocellular from cirrhotic states only; 5) liver transplantation; 6) death attributed to chronic hepatitis B from all health states; 7) death in compensated cirrhosis, attributed to chronic hepatitis B; 8) death from advanced liver disease (decompensated cirrhosis and hepatocellular carcinoma); and 9) death from decompensated cirrhosis, hepatocellular carcinoma, liver transplantation and post-liver transplantation.

812 *Table S29: Treatment validation test cohort and treatment characteristics*

| Cohort Characteristics                                                         | Base-case |
|--------------------------------------------------------------------------------|-----------|
| Model horizon                                                                  | Life-time |
| Cohort Age                                                                     | 30 Years  |
| <b>Distribution in Active CHB States</b>                                       |           |
| Immune Tolerant Phase                                                          | 5.74      |
| Immune Active Phase (eAg+)                                                     |           |
| HBeAg+, Non-Cirrhotic                                                          | 21.02     |
| HBeAg+, Cirrhotic*                                                             | 1.11      |
| Immune Active Phase (eAg-)                                                     |           |
| HBeAg-, Non-Cirrhotic                                                          | 31.12     |
| HBeAg-, Cirrhotic*                                                             | 1.64      |
| Immune Inactive Phase                                                          |           |
| HBeAg-, Inactive CHB, Non-Cirrhotic                                            | 37.40     |
| HBeAg-, Inactive CHB, Cirrhotic*                                               | 1.97      |
| <b>Treatment Characteristics</b>                                               |           |
| Hepatitis B virus DNA suppression                                              | 100%      |
| Adherence to therapy                                                           | 100%      |
| Development of resistance to tenofovir therapy                                 | 0%        |
| HBeAg-/+= Hepatitis B eAntigen negative or positive; CHB = Chronic Hepatitis B |           |

813

814            **Supplement Figure 9** below shows the outcomes of the model, represented as percent reduction in  
815            clinical outcomes with tenofovir treatment compared to no treatment. Overall, the model predicts  
816            appropriate levels of reduction in all key clinical outcomes. Reduction in development of cirrhosis,  
817            decompensation and hepatocellular carcinoma ranges from 33% to 67%, in general congruence with  
818            reported data and patterns. For example, Papatheodoridis, et al. reported an overall treatment related  
819            reduction of liver cancer of approximately 30%, our model predicts a reduction of 33% (light gray box in  
820            the figure below).<sup>163</sup> It has also been observed that reduction in hepatocellular carcinoma with  
821            treatment is higher in patients with cirrhosis.<sup>97,162</sup> In our model patients with cirrhosis experienced 46%  
822            increased reduction in liver cancer compared to overall reduction of 33%.

823

824

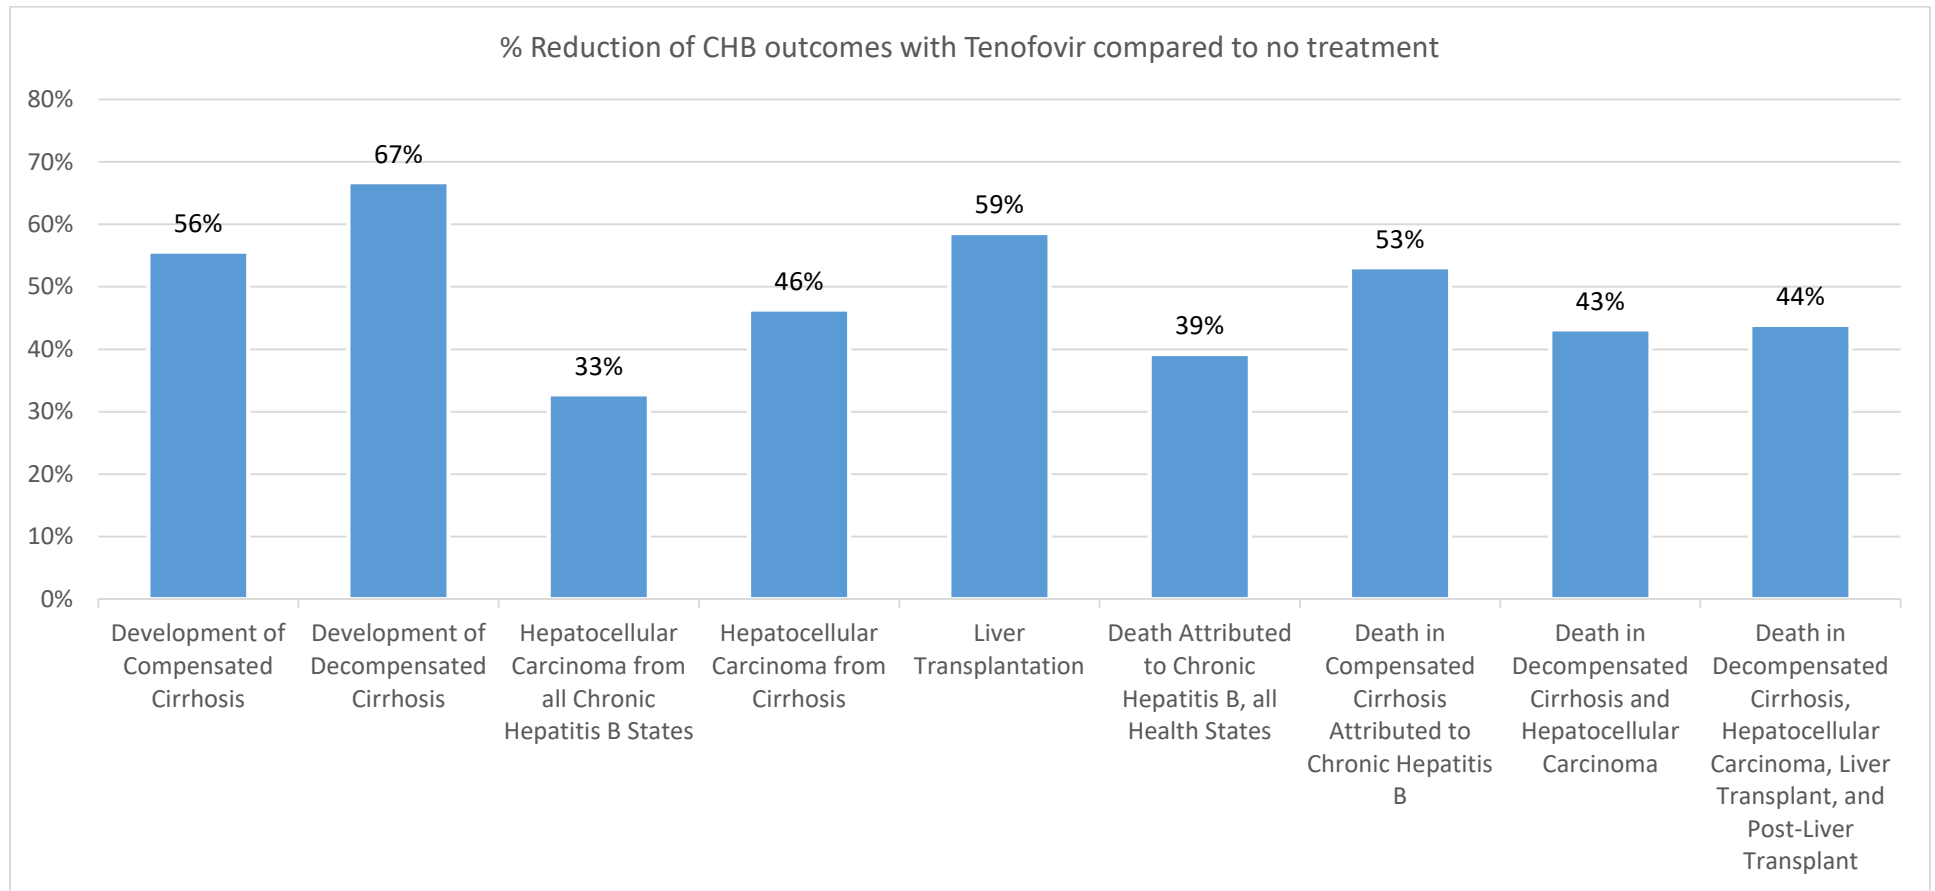

825

826

Figure S9: Percent reduction of key clinical outcomes of chronic hepatitis B with treatment

827

Supplement Figure 9 caption: The figure shows percent reduction of key clinical outcomes measured by the model for treatment with tenofovir compare to no treatment.

828

IV. Additional Base-Case Results

1. Results by strategy and program for each study population

a. Screen and Vaccinate

Table S30: Base-case results for screen and vaccinate strategy by program, by population

| Strategy, by Population             | Cost (USD) | Incremental Cost (USD) | QALYs  | Incremental QALYs | ICER (USD/QALY) | Drug Costs (USD) | Health Care Costs (USD) | Screening Costs^ (USD) | Life Years |
|-------------------------------------|------------|------------------------|--------|-------------------|-----------------|------------------|-------------------------|------------------------|------------|
| <b>Asian and Pacific Islanders</b>  |            |                        |        |                   |                 |                  |                         |                        |            |
| No Intervention                     | \$3,902    | -                      | 23.780 | -                 | -               | \$0              | \$3,902                 | \$0                    | 24.369     |
| Community Outreach/Clinic Referral  | \$4,001    | \$99                   | 23.787 | 0.007             | 13,397          | \$0              | \$3,876                 | \$125                  | 24.373     |
| <b>Africa Born Black Population</b> |            |                        |        |                   |                 |                  |                         |                        |            |
| No Intervention                     | \$4,928    | -                      | 23.551 | -                 | -               | \$0              | \$4,928                 | \$0                    | 24.205     |
| Community Outreach/Clinic Referral  | \$5,024    | \$96                   | 23.559 | 0.009             | 11,086          | \$0              | \$4,897                 | \$127                  | 24.210     |
| <b>Incarcerated Persons</b>         |            |                        |        |                   |                 |                  |                         |                        |            |
| Universal Screening                 | \$999      | -                      | 24.415 | -                 | -               | \$0              | \$932                   | \$67                   | 24.755     |
| No Intervention                     | \$1,105    | \$106                  | 24.365 | -0.050            | Dominated       | \$0              | \$1,105                 | \$0                    | 24.726     |
| <b>Refugee Population</b>           |            |                        |        |                   |                 |                  |                         |                        |            |
| No Intervention                     | \$3,183    | -                      | 23.934 | -                 | -               | \$0              | \$3,183                 | \$0                    | 24.463     |
| Community Outreach/Clinic Referral  | \$3,278    | \$95                   | 23.944 | 0.010             | 9,453           | \$0              | \$3,147                 | \$130                  | 24.468     |
| <b>People Who Inject Drugs</b>      |            |                        |        |                   |                 |                  |                         |                        |            |
| No Intervention                     | \$6,924    | -                      | 23.070 | -                 | -               | \$0              | \$6,924                 | \$0                    | 23.950     |
| Syringe services programs           | \$6,974    | \$50                   | 23.078 | 0.008             | 6,438           | \$0              | \$6,894                 | \$80                   | 23.954     |
| <b>Men Who Have Sex With Men</b>    |            |                        |        |                   |                 |                  |                         |                        |            |
| No Intervention                     | \$1,354    | -                      | 24.325 | -                 | -               | \$0              | \$1,354                 | \$0                    | 24.701     |
| STI Clinics                         | \$1,361    | \$8                    | 24.336 | 0.011             | 695             | \$0              | \$1,316                 | \$46                   | 24.707     |

USD: United States Dollar; QALYs: Quality-Adjusted Life-Years; ICER: Incremental Cost-Effectiveness Ratio; STI: Sexually Transmitted Infections

^Screening costs include vaccination costs.

Technical Supplement – Detailed Methods and Additional Results

b. Screen and Treat with Tenofovir

Table S31: Base-case results for screen and treat (with tenofovir) strategy by program, by population

| Strategy, by Population                                                                                                                         | Cost (USD) | Incremental Cost (USD) | QALYs  | Incremental QALYs | ICER (USD/QALY) | Drug Costs (USD) | Health Care Costs (USD) | Screening Costs^ (USD) | Life Years |
|-------------------------------------------------------------------------------------------------------------------------------------------------|------------|------------------------|--------|-------------------|-----------------|------------------|-------------------------|------------------------|------------|
| <b>Asian and Pacific Islanders</b>                                                                                                              |            |                        |        |                   |                 |                  |                         |                        |            |
| No Intervention                                                                                                                                 | \$3,902    | -                      | 23.780 | -                 | -               | \$0              | \$3,902                 | \$0                    | 24.369     |
| Community Outreach/Clinic Partnership                                                                                                           | \$4,911    | \$1,009                | 23.827 | 0.048             | 21,159          | \$1,006          | \$3,762                 | \$143                  | 24.413     |
| Community Outreach/Clinic Referral                                                                                                              | \$5,360    | \$449                  | 23.853 | 0.026             | 17,314          | \$1,553          | \$3,686                 | \$121                  | 24.437     |
| <b>Africa Born Black Population</b>                                                                                                             |            |                        |        |                   |                 |                  |                         |                        |            |
| No Intervention                                                                                                                                 | \$4,928    | -                      | 23.551 | -                 | -               | \$0              | \$4,928                 | \$0                    | 24.205     |
| Community Outreach/Clinic Partnership                                                                                                           | \$6,739    | \$1,811                | 23.646 | 0.096             | 18,947          | \$1,927          | \$4,662                 | \$151                  | 24.296     |
| <b>Incarcerated Persons</b>                                                                                                                     |            |                        |        |                   |                 |                  |                         |                        |            |
| No Intervention                                                                                                                                 | \$1,105    | -                      | 24.365 | -                 | -               | \$0              | \$1,105                 | \$0                    | 24.726     |
| Universal Screening                                                                                                                             | \$1,446    | \$341                  | 24.382 | 0.017             | 20,032          | \$359            | \$1,055                 | \$32                   | 24.742     |
| <b>Refugee Population</b>                                                                                                                       |            |                        |        |                   |                 |                  |                         |                        |            |
| No Intervention                                                                                                                                 | \$3,183    | -                      | 23.934 | -                 | -               | \$0              | \$3,183                 | \$0                    | 24.463     |
| Community Outreach/Clinic Partnership                                                                                                           | \$4,746    | \$1,563                | 24.011 | 0.078             | 20,066          | \$1,642          | \$2,955                 | \$148                  | 24.535     |
| <b>People Who Inject Drugs</b>                                                                                                                  |            |                        |        |                   |                 |                  |                         |                        |            |
| No Intervention                                                                                                                                 | \$6,924    | -                      | 23.070 | -                 | -               | \$0              | \$6,924                 | \$0                    | 23.950     |
| Syringe services programs                                                                                                                       | \$7,016    | \$92                   | 23.071 | 0.001             | 96,657          | \$15             | \$6,922                 | \$80                   | 23.951     |
| <b>Men Who Have Sex With Men</b>                                                                                                                |            |                        |        |                   |                 |                  |                         |                        |            |
| No Intervention                                                                                                                                 | \$1,354    | -                      | 24.325 | -                 | -               | \$0              | \$1,354                 | \$0                    | 24.701     |
| STI Clinics                                                                                                                                     | \$1,637    | \$283                  | 24.338 | 0.014             | 20,412          | \$293            | \$1,313                 | \$31                   | 24.713     |
| USD: United States Dollar; QALYs: Quality-Adjusted Life-Years; ICER: Incremental Cost-Effectiveness Ratio; STI: Sexually Transmitted Infections |            |                        |        |                   |                 |                  |                         |                        |            |
| ^Screening costs include vaccination costs.                                                                                                     |            |                        |        |                   |                 |                  |                         |                        |            |



Technical Supplement – Detailed Methods and Additional Results

c. Screen and Treat with Entecavir

Table S32: Base-case results for screen and treat (with entecavir) strategy by program, by population

| Strategy, by Population                                                                                                                         | Cost (USD) | Incremental Cost (USD) | QALYs  | Incremental QALYs | ICER (USD/QALY) | Drug Costs (USD) | Health Care Costs (USD) | Screening Costs^ (USD) | Life Years |
|-------------------------------------------------------------------------------------------------------------------------------------------------|------------|------------------------|--------|-------------------|-----------------|------------------|-------------------------|------------------------|------------|
| <b>Asian and Pacific Islanders</b>                                                                                                              |            |                        |        |                   |                 |                  |                         |                        |            |
| No Intervention                                                                                                                                 | \$3,902    | \$0                    | 23.780 | 0.000             | \$0             | \$0              | \$3,902                 | \$0                    | 24.369     |
| Community Outreach/Clinic Partnership                                                                                                           | \$4,586    | \$685                  | 23.819 | 0.039             | \$17,587        | \$652            | \$3,792                 | \$143                  | 24.406     |
| Community Outreach/Clinic Referral                                                                                                              | \$4,859    | \$273                  | 23.840 | 0.021             | \$12,878        | \$1,007          | \$3,732                 | \$121                  | 24.426     |
| <b>Africa Born Black Population</b>                                                                                                             |            |                        |        |                   |                 |                  |                         |                        |            |
| No Intervention                                                                                                                                 | \$4,928    | \$0                    | 23.551 | 0.000             | \$0             | \$0              | \$4,928                 | \$0                    | 24.205     |
| Community Outreach/Clinic Partnership                                                                                                           | \$6,114    | \$1,186                | 23.629 | 0.078             | \$15,169        | \$1,245          | \$4,718                 | \$151                  | 24.281     |
| <b>Incarcerated Persons</b>                                                                                                                     |            |                        |        |                   |                 |                  |                         |                        |            |
| No Intervention                                                                                                                                 | \$1,105    | \$0                    | 24.365 | 0.000             | \$0             | \$0              | \$1,105                 | \$0                    | 24.726     |
| Universal Screening                                                                                                                             | \$1,330    | \$225                  | 24.378 | 0.014             | \$16,207        | \$233            | \$1,066                 | \$32                   | 24.740     |
| <b>Refugee Population</b>                                                                                                                       |            |                        |        |                   |                 |                  |                         |                        |            |
| No Intervention                                                                                                                                 | \$3,183    | \$0                    | 23.934 | 0.000             | \$0             | \$0              | \$3,183                 | \$0                    | 24.463     |
| Community Outreach/Clinic Partnership                                                                                                           | \$4,216    | \$1,033                | 23.997 | 0.064             | \$16,248        | \$1,065          | \$3,003                 | \$148                  | 24.523     |
| <b>People Who Inject Drugs</b>                                                                                                                  |            |                        |        |                   |                 |                  |                         |                        |            |
| No Intervention                                                                                                                                 | \$6,924    | \$0                    | 23.070 | 0.000             | \$0             | \$0              | \$6,924                 | \$0                    | 23.950     |
| Syringe services programs                                                                                                                       | \$7,013    | \$89                   | 23.071 | 0.001             | \$90,881        | \$11             | \$6,923                 | \$80                   | 23.951     |
| <b>Men Who Have Sex With Men</b>                                                                                                                |            |                        |        |                   |                 |                  |                         |                        |            |
| No Intervention                                                                                                                                 | \$1,354    | \$0                    | 24.325 | 0.000             | \$0             | \$0              | \$1,354                 | \$0                    | 24.701     |
| STI Clinics                                                                                                                                     | \$1,543    | \$189                  | 24.336 | 0.011             | \$16,672        | \$190            | \$1,322                 | \$31                   | 24.711     |
| USD: United States Dollar; QALYs: Quality-Adjusted Life-Years; ICER: Incremental Cost-Effectiveness Ratio; STI: Sexually Transmitted Infections |            |                        |        |                   |                 |                  |                         |                        |            |
| ^Screening costs include vaccination costs.                                                                                                     |            |                        |        |                   |                 |                  |                         |                        |            |

Technical Supplement – Detailed Methods and Additional Results

d. Screen and Treat (with Tenofovir) or Vaccinate

Table S33: Base-case results for screen and vaccinate or treat (with tenofovir) strategy by program, by population

| Strategy, by Population                                                                                                                         | Cost (USD) | Incremental Cost (USD) | Incremental QALYs | Incremental QALYs | ICER (USD/QALY) | Drug Costs (USD) | Health Care Costs (USD) | Screening Costs^ (USD) | Life Years |
|-------------------------------------------------------------------------------------------------------------------------------------------------|------------|------------------------|-------------------|-------------------|-----------------|------------------|-------------------------|------------------------|------------|
| <b>Asian and Pacific Islanders</b>                                                                                                              |            |                        |                   |                   |                 |                  |                         |                        |            |
| No Intervention                                                                                                                                 | \$3,902    | -                      | 23.780            | -                 | -               | \$0              | \$3,902                 | \$0                    | 24.369     |
| Community Outreach/Clinic Referral                                                                                                              | \$5,361    | \$1,459                | 23.861            | 0.081             | 18,009          | \$1,553          | \$3,661                 | \$148                  | 24.441     |
| <b>Africa Born Black Population</b>                                                                                                             |            |                        |                   |                   |                 |                  |                         |                        |            |
| No Intervention                                                                                                                                 | \$4,928    | -                      | 23.551            | -                 | -               | \$0              | \$4,928                 | \$0                    | 24.205     |
| Community Outreach/Clinic Referral                                                                                                              | \$6,676    | \$1,748                | 23.653            | 0.102             | 17,089          | \$1,887          | \$4,636                 | \$153                  | 24.299     |
| <b>Incarcerated Persons</b>                                                                                                                     |            |                        |                   |                   |                 |                  |                         |                        |            |
| No Intervention                                                                                                                                 | \$1,105    | -                      | 24.365            | -                 | -               | \$0              | \$1,105                 | \$0                    | 24.726     |
| Universal Screening                                                                                                                             | \$1,321    | \$216                  | 24.432            | 0.067             | 3,203           | \$359            | \$882                   | \$80                   | 24.770     |
| <b>Refugee Population</b>                                                                                                                       |            |                        |                   |                   |                 |                  |                         |                        |            |
| No Intervention                                                                                                                                 | \$3,183    | -                      | 23.934            | -                 | -               | \$0              | \$3,183                 | \$0                    | 24.463     |
| Community Outreach/Clinic Referral                                                                                                              | \$4,716    | \$1,534                | 24.021            | 0.088             | 17,432          | \$1,642          | \$2,920                 | \$154                  | 24.540     |
| <b>People Who Inject Drugs</b>                                                                                                                  |            |                        |                   |                   |                 |                  |                         |                        |            |
| No Intervention                                                                                                                                 | \$6,924    | -                      | 23.070            | -                 | -               | \$0              | \$6,924                 | \$0                    | 23.950     |
| Syringe services programs                                                                                                                       | \$7,144    | \$220                  | 23.090            | 0.020             | 11,160          | \$184            | \$6,869                 | \$91                   | 23.966     |
| <b>Men Who Have Sex With Men</b>                                                                                                                |            |                        |                   |                   |                 |                  |                         |                        |            |
| No Intervention                                                                                                                                 | \$1,354    | -                      | 24.325            | -                 | -               | \$0              | \$1,354                 | \$0                    | 24.701     |
| STI Clinics                                                                                                                                     | \$1,626    | \$272                  | 24.349            | 0.025             | 10,954          | \$293            | \$1,275                 | \$58                   | 24.719     |
| USD: United States Dollar; QALYs: Quality-Adjusted Life-Years; ICER: Incremental Cost-Effectiveness Ratio; STI: Sexually Transmitted Infections |            |                        |                   |                   |                 |                  |                         |                        |            |
| ^Screening costs include vaccination costs.                                                                                                     |            |                        |                   |                   |                 |                  |                         |                        |            |

843

Technical Supplement – Detailed Methods and Additional Results

e. Screen and Treat (with Entecavir) or Vaccinate

Table S34: Base-case results for screen and vaccinate or treat strategy by program, by population

| Strategy, by Population                                                                                                                         | Cost (USD) | Incremental Cost (USD) | QALYs  | Incremental QALYs | ICER (USD/QALY) | Drug Costs (USD) | Health Care Costs (USD) | Screening Costs^ (USD) | Life Years |
|-------------------------------------------------------------------------------------------------------------------------------------------------|------------|------------------------|--------|-------------------|-----------------|------------------|-------------------------|------------------------|------------|
| <b>Asian and Pacific Islanders</b>                                                                                                              |            |                        |        |                   |                 |                  |                         |                        |            |
| No Intervention                                                                                                                                 | \$3,902    | \$0                    | 23.780 | 0.000             | \$0             | \$0              | \$3,902                 | \$0                    | 24.369     |
| Community Outreach/Clinic Referral                                                                                                              | \$4,860    | \$958                  | 23.847 | 0.068             | \$14,198        | \$1,007          | \$3,706                 | \$148                  | 24.430     |
| <b>Africa Born Black Population</b>                                                                                                             |            |                        |        |                   |                 |                  |                         |                        |            |
| No Intervention                                                                                                                                 | \$4,928    | \$0                    | 23.551 | 0                 | \$0             | \$0              | \$4,928                 | \$0                    | 24.205     |
| Community Outreach/Clinic Referral                                                                                                              | \$6,064    | \$1,136                | 23.636 | 0.085             | \$13,323        | \$1,220          | \$4,691                 | \$153                  | 24.285     |
| <b>Incarcerated Persons</b>                                                                                                                     |            |                        |        |                   |                 |                  |                         |                        |            |
| No Intervention                                                                                                                                 | \$1,105    | \$0                    | 24.365 | 0                 | \$0             | \$0              | \$1,105                 | \$0                    | 24.726     |
| Universal Screening                                                                                                                             | \$1,205    | \$100                  | 24.429 | 0.064             | \$1,558         | \$233            | \$892                   | \$80                   | 24.768     |
| <b>Refugee Population</b>                                                                                                                       |            |                        |        |                   |                 |                  |                         |                        |            |
| No Intervention                                                                                                                                 | \$3,183    | \$0                    | 23.934 | 0                 | \$0             | \$0              | \$3,183                 | \$0                    | 24.463     |
| Community Outreach/Clinic Referral                                                                                                              | \$4,186    | \$1,004                | 24.007 | 0.074             | \$13,626        | \$1,065          | \$2,968                 | \$154                  | 24.529     |
| <b>People Who Inject Drugs</b>                                                                                                                  |            |                        |        |                   |                 |                  |                         |                        |            |
| No Intervention                                                                                                                                 | \$6,924    | \$0                    | 23.070 | 0                 | \$0             | \$0              | \$6,924                 | \$0                    | 23.950     |
| Syringe services programs                                                                                                                       | \$7,109    | \$185                  | 23.090 | 0.020             | \$9,194         | \$131            | \$6,886                 | \$91                   | 23.968     |
| <b>Men Who Have Sex With Men</b>                                                                                                                |            |                        |        |                   |                 |                  |                         |                        |            |
| No Intervention                                                                                                                                 | \$1,354    | \$0                    | 24.325 | 0                 | \$0             | \$0              | \$1,354                 | \$0                    | 24.701     |
| STI Clinics                                                                                                                                     | \$1,531    | \$178                  | 24.347 | 0.022             | \$7,970         | \$190            | \$1,284                 | \$58                   | 24.717     |
| USD: United States Dollar; QALYs: Quality-Adjusted Life-Years; ICER: Incremental Cost-Effectiveness Ratio; STI: Sexually Transmitted Infections |            |                        |        |                   |                 |                  |                         |                        |            |
| ^Screening costs include vaccination costs.                                                                                                     |            |                        |        |                   |                 |                  |                         |                        |            |

2. Results by comparative broad strategies for each study population

a. Primary base-case results with drug (with tenofovir), health and screening costs plus life years

Table S35: Base-case results for screening and linkage to care (tenofovir treatment) strategies, by population

| Strategy*, by Population            | Cost (USD) | Incremental Cost (USD) | QALYs  | Incremental QALYs | ICER (USD/QALY) | Drug Costs (USD) | Health Care Costs (USD) | Screening Costs^ (USD) | Life Years |
|-------------------------------------|------------|------------------------|--------|-------------------|-----------------|------------------|-------------------------|------------------------|------------|
| <b>Asian and Pacific Islanders</b>  |            |                        |        |                   |                 |                  |                         |                        |            |
| No Intervention                     | \$3,902    | -                      | 23.780 | -                 | -               | \$0              | \$3,902                 | \$0                    | 24.369     |
| Vaccination Only                    | \$4,001    | \$99                   | 23.787 | 0.007             | 13,397          | \$0              | \$3,876                 | \$125                  | 24.373     |
| Treatment Only                      | \$5,360    | \$1,359                | 23.853 | 0.066             | 20,519          | \$1,553          | \$3,686                 | \$121                  | 24.437     |
| Inclusive                           | \$5,361    | \$1                    | 23.861 | 0.007             | 129             | \$1,553          | \$3,661                 | \$148                  | 24.441     |
| <b>Africa Born Black Population</b> |            |                        |        |                   |                 |                  |                         |                        |            |
| No Intervention                     | \$4,928    | -                      | 23.551 | -                 | -               | \$0              | \$4,928                 | \$0                    | 24.205     |
| Vaccination Only                    | \$5,024    | \$96                   | 23.559 | 0.009             | 11,086          | \$0              | \$4,897                 | \$127                  | 24.210     |
| Inclusive                           | \$6,676    | \$1,652                | 23.653 | 0.094             | 17,645          | \$1,887          | \$4,636                 | \$153                  | 24.299     |
| Treatment Only                      | \$6,739    | \$63                   | 23.646 | -0.007            | Dominated       | \$1,927          | \$4,662                 | \$151                  | 24.296     |
| <b>Incarcerated Persons</b>         |            |                        |        |                   |                 |                  |                         |                        |            |
| Vaccination Only                    | \$999      | -                      | 24.415 | -                 | -               | \$0              | \$932                   | \$67                   | 24.755     |
| No Intervention                     | \$1,105    | \$106                  | 24.365 | -0.050            | Dominated       | \$0              | \$1,105                 | \$0                    | 24.726     |
| Inclusive                           | \$1,321    | \$322                  | 24.432 | 0.017             | 18,922          | \$359            | \$882                   | \$80                   | 24.770     |
| Treatment Only                      | \$1,446    | \$125                  | 24.382 | -0.050            | Dominated       | \$359            | \$1,055                 | \$32                   | 24.742     |
| <b>Refugee Population</b>           |            |                        |        |                   |                 |                  |                         |                        |            |
| No Intervention                     | \$3,183    | -                      | 23.934 | -                 | -               | \$0              | \$3,183                 | \$0                    | 24.463     |
| Vaccination Only                    | \$3,278    | \$95                   | 23.944 | 0.010             | 9,453           | \$0              | \$3,147                 | \$130                  | 24.468     |
| Inclusive                           | \$4,716    | \$1,438                | 24.021 | 0.078             | 18,465          | \$1,642          | \$2,920                 | \$154                  | 24.540     |
| Treatment Only                      | \$4,746    | \$29                   | 24.011 | -0.010            | Dominated       | \$1,642          | \$2,955                 | \$148                  | 24.535     |
| <b>People Who Inject Drugs</b>      |            |                        |        |                   |                 |                  |                         |                        |            |
| No Intervention                     | \$6,924    | -                      | 23.070 | -                 | -               | \$0              | \$6,924                 | \$0                    | 23.950     |
| Vaccination Only                    | \$6,974    | \$50                   | 23.078 | 0.008             | 6,438           | \$0              | \$6,894                 | \$80                   | 23.954     |
| Inclusive                           | \$6,999    | \$24                   | 23.079 | 0.001             | 25,551          | \$15             | \$6,892                 | \$91                   | 23.955     |
| Treatment Only                      | \$7,016    | \$18                   | 23.071 | -0.008            | Dominated       | \$15             | \$6,922                 | \$80                   | 23.951     |
| <b>Men Who Have Sex With Men</b>    |            |                        |        |                   |                 |                  |                         |                        |            |
| No Intervention                     | \$1,354    | -                      | 24.325 | -                 | -               | \$0              | \$1,354                 | \$0                    | 24.701     |
| Vaccination Only                    | \$1,361    | \$8                    | 24.336 | 0.011             | 695             | \$0              | \$1,316                 | \$46                   | 24.707     |
| Inclusive                           | \$1,626    | \$264                  | 24.349 | 0.014             | 19,052          | \$293            | \$1,275                 | \$58                   | 24.719     |
| Treatment Only                      | \$1,637    | \$11                   | 24.338 | -0.011            | Dominated       | \$293            | \$1,313                 | \$31                   | 24.713     |

\*Specific screen and linkage to care programs for each broad strategy are shown in Table S6.

USD: United States Dollar; QALYs: Quality-Adjusted Life-Years

^Screening costs include vaccination costs.

Technical Supplement – Detailed Methods and Additional Results

b. Base-case results with drug (with entecavir), health and screening costs plus life years

Table S36: Base-case results for screening and linkage to care (entecavir treatment) strategies, by population

| Strategy*, by Population            | Cost (USD) | Incremental Cost (USD) | QALYs  | Incremental QALYs | ICER (USD/QALY) | Drug Costs (USD) | Health Care Costs (USD) | Screening Costs^ (USD) | Life Years |
|-------------------------------------|------------|------------------------|--------|-------------------|-----------------|------------------|-------------------------|------------------------|------------|
| <b>Asian and Pacific Islanders</b>  |            |                        |        |                   |                 |                  |                         |                        |            |
| No Intervention                     | \$3,902    | -                      | 23.780 | 0.000             | -               | -                | \$3,902                 | -                      | 24.369     |
| Vaccination Only                    | \$4,001    | \$99                   | 23.787 | 0.007             | \$13,397        | -                | \$3,876                 | \$125                  | 24.373     |
| Treatment Only                      | \$4,859    | \$858                  | 23.840 | 0.053             | \$16,283        | \$1,007          | \$3,732                 | \$121                  | 24.426     |
| Inclusive                           | \$4,860    | \$1                    | 23.847 | 0.007             | \$129           | \$1,007          | \$3,706                 | \$148                  | 24.430     |
| <b>Africa Born Black Population</b> |            |                        |        |                   |                 |                  |                         |                        |            |
| No Intervention                     | \$4,928    | -                      | 23.551 | 0.000             | -               | -                | \$4,928                 | -                      | 24.205     |
| Vaccination Only                    | \$5,024    | \$96                   | 23.559 | 0.009             | \$11,086        | -                | \$4,897                 | \$127                  | 24.210     |
| Inclusive                           | \$6,064    | \$1,039                | 23.636 | 0.077             | \$13,577        | \$1,220          | \$4,691                 | \$153                  | 24.285     |
| Treatment Only                      | \$6,114    | \$50                   | 23.629 | -0.007            | Dominated       | \$1,245          | \$4,718                 | \$151                  | 24.281     |
| <b>Incarcerated Persons</b>         |            |                        |        |                   |                 |                  |                         |                        |            |
| Vaccination Only                    | \$999      | -                      | 24.415 | 0.000             | -               | -                | \$932                   | \$67                   | 24.755     |
| No Intervention                     | \$1,105    | \$106                  | 24.365 | -0.050            | Dominated       | -                | \$1,105                 | -                      | 24.726     |
| Inclusive                           | \$1,205    | \$206                  | 24.429 | 0.014             | \$14,847        | \$233            | \$892                   | \$80                   | 24.768     |
| Treatment Only                      | \$1,330    | \$125                  | 24.378 | -0.050            | Dominated       | \$233            | \$1,066                 | \$32                   | 24.740     |
| <b>Refugee Population</b>           |            |                        |        |                   |                 |                  |                         |                        |            |
| No Intervention                     | \$3,183    | -                      | 23.934 | 0.000             | -               | -                | \$3,183                 | -                      | 24.463     |
| Vaccination Only                    | \$3,278    | \$95                   | 23.944 | 0.010             | \$9,453         | -                | \$3,147                 | \$130                  | 24.468     |
| Inclusive                           | \$4,186    | \$909                  | 24.007 | 0.064             | \$14,288        | \$1,065          | \$2,968                 | \$154                  | 24.529     |
| Treatment Only                      | \$4,216    | \$29                   | 23.997 | -0.010            | Dominated       | \$1,065          | \$3,003                 | \$148                  | 24.523     |
| <b>People Who Inject Drugs</b>      |            |                        |        |                   |                 |                  |                         |                        |            |
| No Intervention                     | \$6,924    | -                      | 23.070 | 0.000             | -               | -                | \$6,924                 | -                      | 23.950     |
| Vaccination Only                    | \$6,974    | \$50                   | 23.078 | 0.008             | \$6,438         | -                | \$6,894                 | \$80                   | 23.954     |
| Inclusive                           | \$6,996    | \$21                   | 23.079 | 0.001             | \$21,897        | \$11             | \$6,894                 | \$91                   | 23.955     |
| Treatment Only                      | \$7,013    | \$18                   | 23.071 | -0.008            | Dominated       | \$11             | \$6,923                 | \$80                   | 23.951     |
| <b>Men Who Have Sex With Men</b>    |            |                        |        |                   |                 |                  |                         |                        |            |
| No Intervention                     | \$1,354    | -                      | 24.325 | 0.000             | -               | -                | \$1,354                 | -                      | 24.701     |
| Vaccination Only                    | \$1,361    | \$8                    | 24.336 | 0.011             | \$695           | -                | \$1,316                 | \$46                   | 24.707     |
| Inclusive                           | \$1,531    | \$170                  | 24.347 | 0.011             | \$15,006        | \$190            | \$1,284                 | \$58                   | 24.717     |
| Treatment Only                      | \$1,543    | \$11                   | 24.336 | -0.011            | Dominated       | \$190            | \$1,322                 | \$31                   | 24.711     |

\*Specific screen and linkage to care programs for each broad strategy are shown in **Table S6**.

USD: United States Dollar; QALYs: Quality-Adjusted Life-Years

^Screening costs include vaccination costs.

856 **V. Scenario Analysis**

857  
858 **1. Improved screening and linkage to care – ICER Calculations**  
859

860 This scenario assumes 90% consent to screening, followed by 100% referral rate for those found susceptible or infected, followed by 90% successful linkage  
861 to treatment. Acceptance of treatment is modeled at 90% and acceptance of 1<sup>st</sup>, 2<sup>nd</sup> and 3<sup>rd</sup> dose of vaccine at 80% for each dose.

862 See Tables S37 and S38 on the next two pages.

Technical Supplement – Detailed Methods and Additional Results

a. Tenofovir based treatment and retreatment

Table S37: Scenario analysis - Improved screening and linkage to care, using tenofovir based treatment and retreatment - ICER Calculations

| Strategy*, by Population                                                                                                                                                                                   | Cost (USD) | Incremental Cost (USD) | QALYs  | Incremental QALYs | ICER (USD/QALY) | Drug Costs (USD) | Health Care Costs (USD) | Screening Costs^ (USD) | Life Years |
|------------------------------------------------------------------------------------------------------------------------------------------------------------------------------------------------------------|------------|------------------------|--------|-------------------|-----------------|------------------|-------------------------|------------------------|------------|
| <b>Asian and Pacific Islanders</b>                                                                                                                                                                         |            |                        |        |                   |                 |                  |                         |                        |            |
| No Intervention                                                                                                                                                                                            | \$3,902    | \$0                    | 23.780 | 0.000             | -               | \$0              | \$3,902                 | \$0                    | 24.369     |
| Vaccination Only                                                                                                                                                                                           | \$4,016    | \$114                  | 23.799 | 0.020             | 5,777           | \$0              | \$3,833                 | \$183                  | 24.380     |
| Inclusive                                                                                                                                                                                                  | \$6,742    | \$2,726                | 23.948 | 0.148             | 18,394          | \$3,125          | \$3,400                 | \$217                  | 24.517     |
| Treatment Only                                                                                                                                                                                             | \$6,754    | \$12                   | 23.928 | -0.020            | Dominated       | \$3,125          | \$3,468                 | \$160                  | 24.506     |
| <b>Africa Born Black Population</b>                                                                                                                                                                        |            |                        |        |                   |                 |                  |                         |                        |            |
| No Intervention                                                                                                                                                                                            | \$4,928    | \$0                    | 23.551 | 0.000             | -               | \$0              | \$4,928                 | \$0                    | 24.205     |
| Vaccination Only                                                                                                                                                                                           | \$5,035    | \$107                  | 23.574 | 0.023             | 4,589           | \$0              | \$4,845                 | \$189                  | 24.218     |
| Inclusive                                                                                                                                                                                                  | \$8,346    | \$3,312                | 23.762 | 0.188             | 17,578          | \$3,798          | \$4,320                 | \$228                  | 24.397     |
| Treatment Only                                                                                                                                                                                             | \$8,400    | \$54                   | 23.739 | -0.023            | Dominated       | \$3,798          | \$4,403                 | \$200                  | 24.384     |
| <b>Incarcerated Persons</b>                                                                                                                                                                                |            |                        |        |                   |                 |                  |                         |                        |            |
| Vaccination Only                                                                                                                                                                                           | \$928      | \$0                    | 24.444 | 0.000             | -               | \$0              | \$830                   | \$97                   | 24.771     |
| No Intervention                                                                                                                                                                                            | \$1,105    | \$177                  | 24.365 | -0.080            | Dominated       | \$0              | \$1,105                 | \$0                    | 24.726     |
| Inclusive                                                                                                                                                                                                  | \$1,421    | \$494                  | 24.471 | 0.026             | 18,795          | \$554            | \$754                   | \$114                  | 24.796     |
| Treatment Only                                                                                                                                                                                             | \$1,623    | \$201                  | 24.391 | -0.080            | Dominated       | \$554            | \$1,028                 | \$41                   | 24.751     |
| <b>Refugee Population</b>                                                                                                                                                                                  |            |                        |        |                   |                 |                  |                         |                        |            |
| No Intervention                                                                                                                                                                                            | \$3,183    | \$0                    | 23.934 | 0.000             | -               | \$0              | \$3,183                 | \$0                    | 24.463     |
| Vaccination Only                                                                                                                                                                                           | \$3,287    | \$104                  | 23.961 | 0.027             | 3,866           | \$0              | \$3,089                 | \$198                  | 24.478     |
| Inclusive                                                                                                                                                                                                  | \$5,470    | \$2,183                | 24.079 | 0.119             | 18,416          | \$2,500          | \$2,742                 | \$228                  | 24.587     |
| Treatment Only                                                                                                                                                                                             | \$5,526    | \$56                   | 24.052 | -0.027            | Dominated       | \$2,500          | \$2,836                 | \$190                  | 24.572     |
| <b>People Who Inject Drugs</b>                                                                                                                                                                             |            |                        |        |                   |                 |                  |                         |                        |            |
| Vaccination Only                                                                                                                                                                                           | \$6,271    | \$0                    | 23.281 | 0.000             | -               | \$0              | \$6,126                 | \$146                  | 24.070     |
| No Intervention                                                                                                                                                                                            | \$6,924    | \$653                  | 23.070 | -0.211            | Dominated       | \$0              | \$6,924                 | \$0                    | 23.950     |
| Inclusive                                                                                                                                                                                                  | \$9,724    | \$3,453                | 23.538 | 0.257             | 13,449          | \$3,959          | \$5,574                 | \$190                  | 24.325     |
| Treatment Only                                                                                                                                                                                             | \$10,465   | \$740                  | 23.327 | -0.211            | Dominated       | \$3,959          | \$6,373                 | \$132                  | 24.204     |
| <b>Men Who Have Sex With Men</b>                                                                                                                                                                           |            |                        |        |                   |                 |                  |                         |                        |            |
| Vaccination Only                                                                                                                                                                                           | \$1,302    | \$0                    | 24.370 | 0.000             | -               | \$0              | \$1,195                 | \$107                  | 24.726     |
| No Intervention                                                                                                                                                                                            | \$1,354    | \$52                   | 24.325 | -0.046            | Dominated       | \$0              | \$1,354                 | \$0                    | 24.701     |
| Inclusive                                                                                                                                                                                                  | \$2,105    | \$803                  | 24.413 | 0.043             | 18,604          | \$910            | \$1,069                 | \$126                  | 24.766     |
| Treatment Only                                                                                                                                                                                             | \$2,181    | \$76                   | 24.368 | -0.046            | Dominated       | \$910            | \$1,228                 | \$43                   | 24.740     |
| *Specific screen and linkage to care programs for each broad strategy are shown in Table S6.<br>USD: United States Dollar; QALYs: Quality-Adjusted Life-Years; ^Screening costs include vaccination costs. |            |                        |        |                   |                 |                  |                         |                        |            |

865

Technical Supplement – Detailed Methods and Additional Results

b. Entecavir based treatment and tenofovir retreatment

Table S38: Scenario analysis - Improved screening and linkage to care, using entecavir based treatment and retreatment - ICER Calculations

| Strategy*, by Population                                                                                                                                                                                     | Cost (USD) | Incremental Cost (USD) | QALYs  | Incremental QALYs | ICER (USD/QALY) | Drug Costs (USD) | Health Care Costs (USD) | Screening Costs^ (USD) | Life Years |
|--------------------------------------------------------------------------------------------------------------------------------------------------------------------------------------------------------------|------------|------------------------|--------|-------------------|-----------------|------------------|-------------------------|------------------------|------------|
| <b>Asian and Pacific Islanders</b>                                                                                                                                                                           |            |                        |        |                   |                 |                  |                         |                        |            |
| No Intervention                                                                                                                                                                                              | \$3,902    | \$0                    | 23.780 | 0.000             | \$0             | \$0              | \$3,902                 | -                      | 24.369     |
| Vaccination Only                                                                                                                                                                                             | \$4,016    | \$114                  | 23.799 | 0.020             | \$5,777         | \$0              | \$3,833                 | \$183                  | 24.380     |
| Inclusive                                                                                                                                                                                                    | \$5,734    | \$1,718                | 23.920 | 0.121             | \$14,201        | \$2,026          | \$3,491                 | \$217                  | 24.495     |
| Treatment Only                                                                                                                                                                                               | \$5,746    | \$12                   | 23.901 | -0.020            | Dominated       | \$2,026          | \$3,559                 | \$160                  | 24.484     |
| <b>Africa Born Black Population</b>                                                                                                                                                                          |            |                        |        |                   |                 |                  |                         |                        |            |
| No Intervention                                                                                                                                                                                              | \$4,928    | \$0                    | 23.551 | 0.000             | \$0             | \$0              | \$4,928                 | -                      | 24.205     |
| Vaccination Only                                                                                                                                                                                             | \$5,035    | \$107                  | 23.574 | 0.023             | \$4,589         | \$0              | \$4,845                 | \$189                  | 24.218     |
| Inclusive                                                                                                                                                                                                    | \$7,114    | \$2,079                | 23.728 | 0.154             | \$13,495        | \$2,454          | \$4,431                 | \$228                  | 24.368     |
| Treatment Only                                                                                                                                                                                               | \$7,168    | \$54                   | 23.705 | -0.023            | Dominated       | \$2,454          | \$4,514                 | \$200                  | 24.355     |
| <b>Incarcerated Persons</b>                                                                                                                                                                                  |            |                        |        |                   |                 |                  |                         |                        |            |
| Vaccination Only                                                                                                                                                                                             | \$928      | \$0                    | 24.444 | 0.000             | \$0             | \$0              | \$830                   | \$97                   | 24.771     |
| No Intervention                                                                                                                                                                                              | \$1,105    | \$177                  | 24.365 | -0.080            | Dominated       | \$0              | \$1,105                 | -                      | 24.726     |
| Inclusive                                                                                                                                                                                                    | \$1,243    | \$315                  | 24.466 | 0.021             | \$14,692        | \$359            | \$770                   | \$114                  | 24.792     |
| Treatment Only                                                                                                                                                                                               | \$1,444    | \$201                  | 24.386 | -0.080            | Dominated       | \$359            | \$1,044                 | \$41                   | 24.747     |
| <b>Refugee Population</b>                                                                                                                                                                                    |            |                        |        |                   |                 |                  |                         |                        |            |
| No Intervention                                                                                                                                                                                              | \$3,183    | \$0                    | 23.934 | 0.000             | \$0             | \$0              | \$3,183                 | -                      | 24.463     |
| Vaccination Only                                                                                                                                                                                             | \$3,287    | \$104                  | 23.961 | 0.027             | \$3,866         | \$0              | \$3,089                 | \$198                  | 24.478     |
| Inclusive                                                                                                                                                                                                    | \$4,664    | \$1,377                | 24.057 | 0.097             | \$14,227        | \$1,621          | \$2,815                 | \$228                  | 24.569     |
| Treatment Only                                                                                                                                                                                               | \$4,720    | \$56                   | 24.030 | -0.027            | Dominated       | \$1,621          | \$2,909                 | \$190                  | 24.555     |
| <b>People Who Inject Drugs</b>                                                                                                                                                                               |            |                        |        |                   |                 |                  |                         |                        |            |
| Vaccination Only                                                                                                                                                                                             | \$6,271    | \$0                    | 23.281 | 0.000             | \$0             | \$0              | \$6,126                 | \$146                  | 24.070     |
| No Intervention                                                                                                                                                                                              | \$6,924    | \$653                  | 23.070 | -0.211            | Dominated       | \$0              | \$6,924                 | -                      | 23.950     |
| Inclusive                                                                                                                                                                                                    | \$8,962    | \$2,691                | 23.546 | 0.265             | \$10,165        | \$2,831          | \$5,941                 | \$190                  | 24.361     |
| Treatment Only                                                                                                                                                                                               | \$9,702    | \$740                  | 23.335 | -0.211            | Dominated       | \$2,831          | \$6,739                 | \$132                  | 24.240     |
| <b>Men Who Have Sex With Men</b>                                                                                                                                                                             |            |                        |        |                   |                 |                  |                         |                        |            |
| Vaccination Only                                                                                                                                                                                             | \$1,302    | \$0                    | 24.370 | 0.000             | \$0             | \$0              | \$1,195                 | \$107                  | 24.726     |
| No Intervention                                                                                                                                                                                              | \$1,354    | \$52                   | 24.325 | -0.046            | Dominated       | \$0              | \$1,354                 | -                      | 24.701     |
| Inclusive                                                                                                                                                                                                    | \$1,811    | \$509                  | 24.405 | 0.035             | \$14,458        | \$590            | \$1,096                 | \$126                  | 24.759     |
| Treatment Only                                                                                                                                                                                               | \$1,887    | \$76                   | 24.360 | -0.046            | Dominated       | \$590            | \$1,254                 | \$43                   | 24.734     |
| *Specific screen and linkage to care programs for each broad strategy are shown in Table S6.<br>USD: United States Dollar; QALYs: Quality-Adjusted Life-Years<br>^Screening costs include vaccination costs. |            |                        |        |                   |                 |                  |                         |                        |            |

868



869 **2. Improved screening and linkage to care - Clinical Outcomes**

870 a. Short-, intermediate-, and long-term clinical outcomes

871 Results of 1 million simulations with base-case values to determine the percent reduction in clinical  
 872 outcomes with a program that screens and treats or vaccinates compared to no intervention.

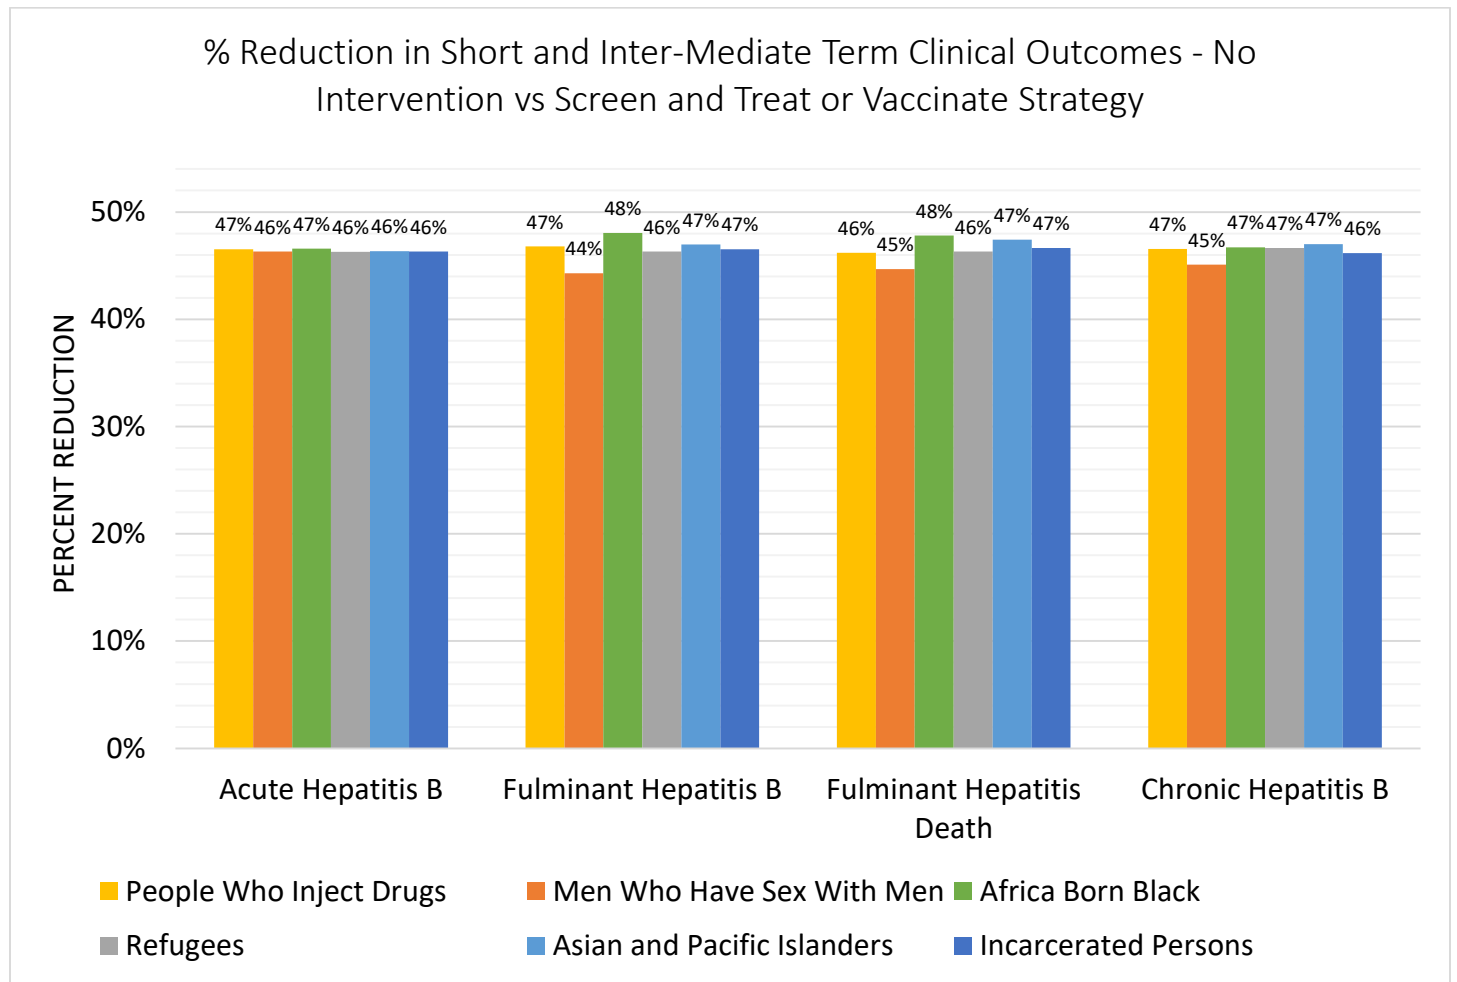

873  
 874 *Figure S10: Short-term and intermediate clinical outcomes for each population in scenario analysis*

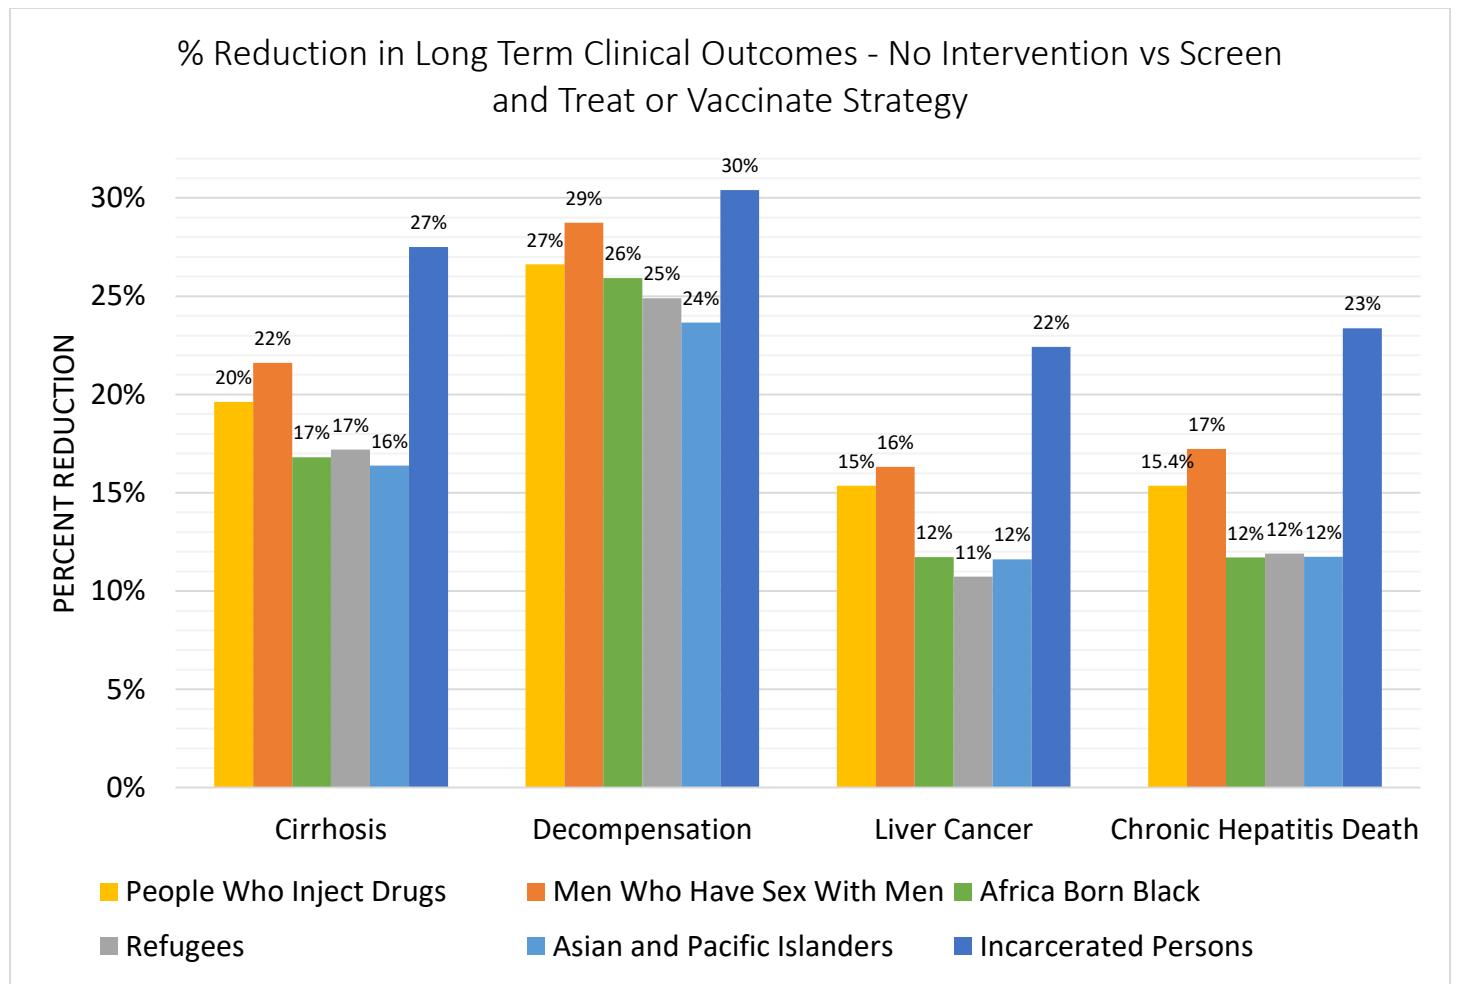

875

876

Figure S11: Long-term clinical outcomes for each population in scenario analysis

877 **VI. Additional One-Way Analyses**

878  
879 This section presents additional one-way analyses. More in depth versions of tornado diagrams are shown. A  
880 table on the impact of hepatitis B population-specific prevalence and incidence rate on is shown in a table.

881 **1. Tornado Analyses:**

882 The main paper presents the top sex variables impacting the incremental cost-effectiveness ration  
883 (ICER). These analyses provide more details (for the top 20 inputs) about the uncertainty around the  
884 inputs and their impact on the model outputs.

885  
886 Six tornado diagrams are shown, one for each population modeled.

887  
888 How to read the tornado diagrams: the blue bars indicate the lower ICER for the value listed first in the  
889 range; orange bars indicate an increase for the 2nd value in the range. These ranges are the uncertainty  
890 around the input and the length of the bars reflects the impact on the ICER of the uncertainty.

891

a. Asian and Pacific Islanders

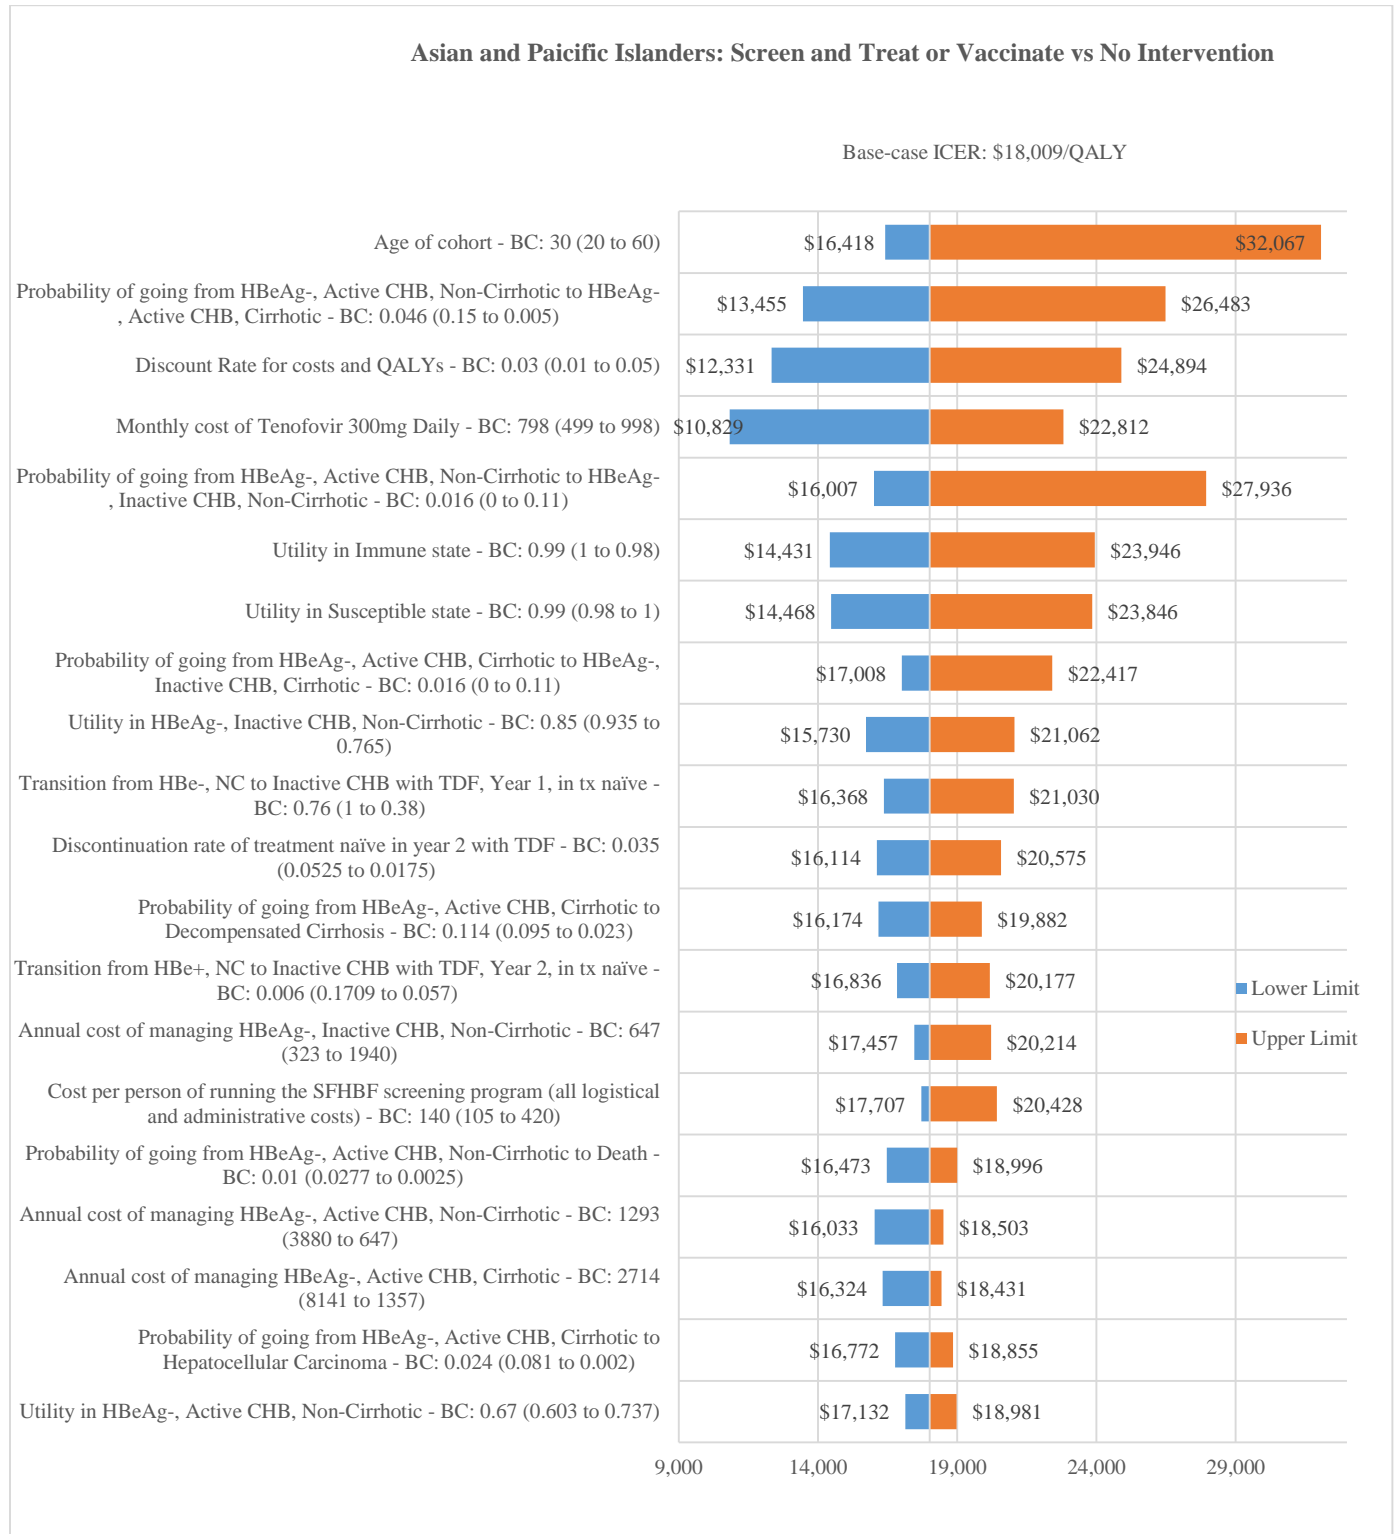

892

893

Figure S12: Sensitivity analysis for the inclusive strategy compared to no intervention for Asian and Pacific Islanders

894

b. Africa Born Black Population

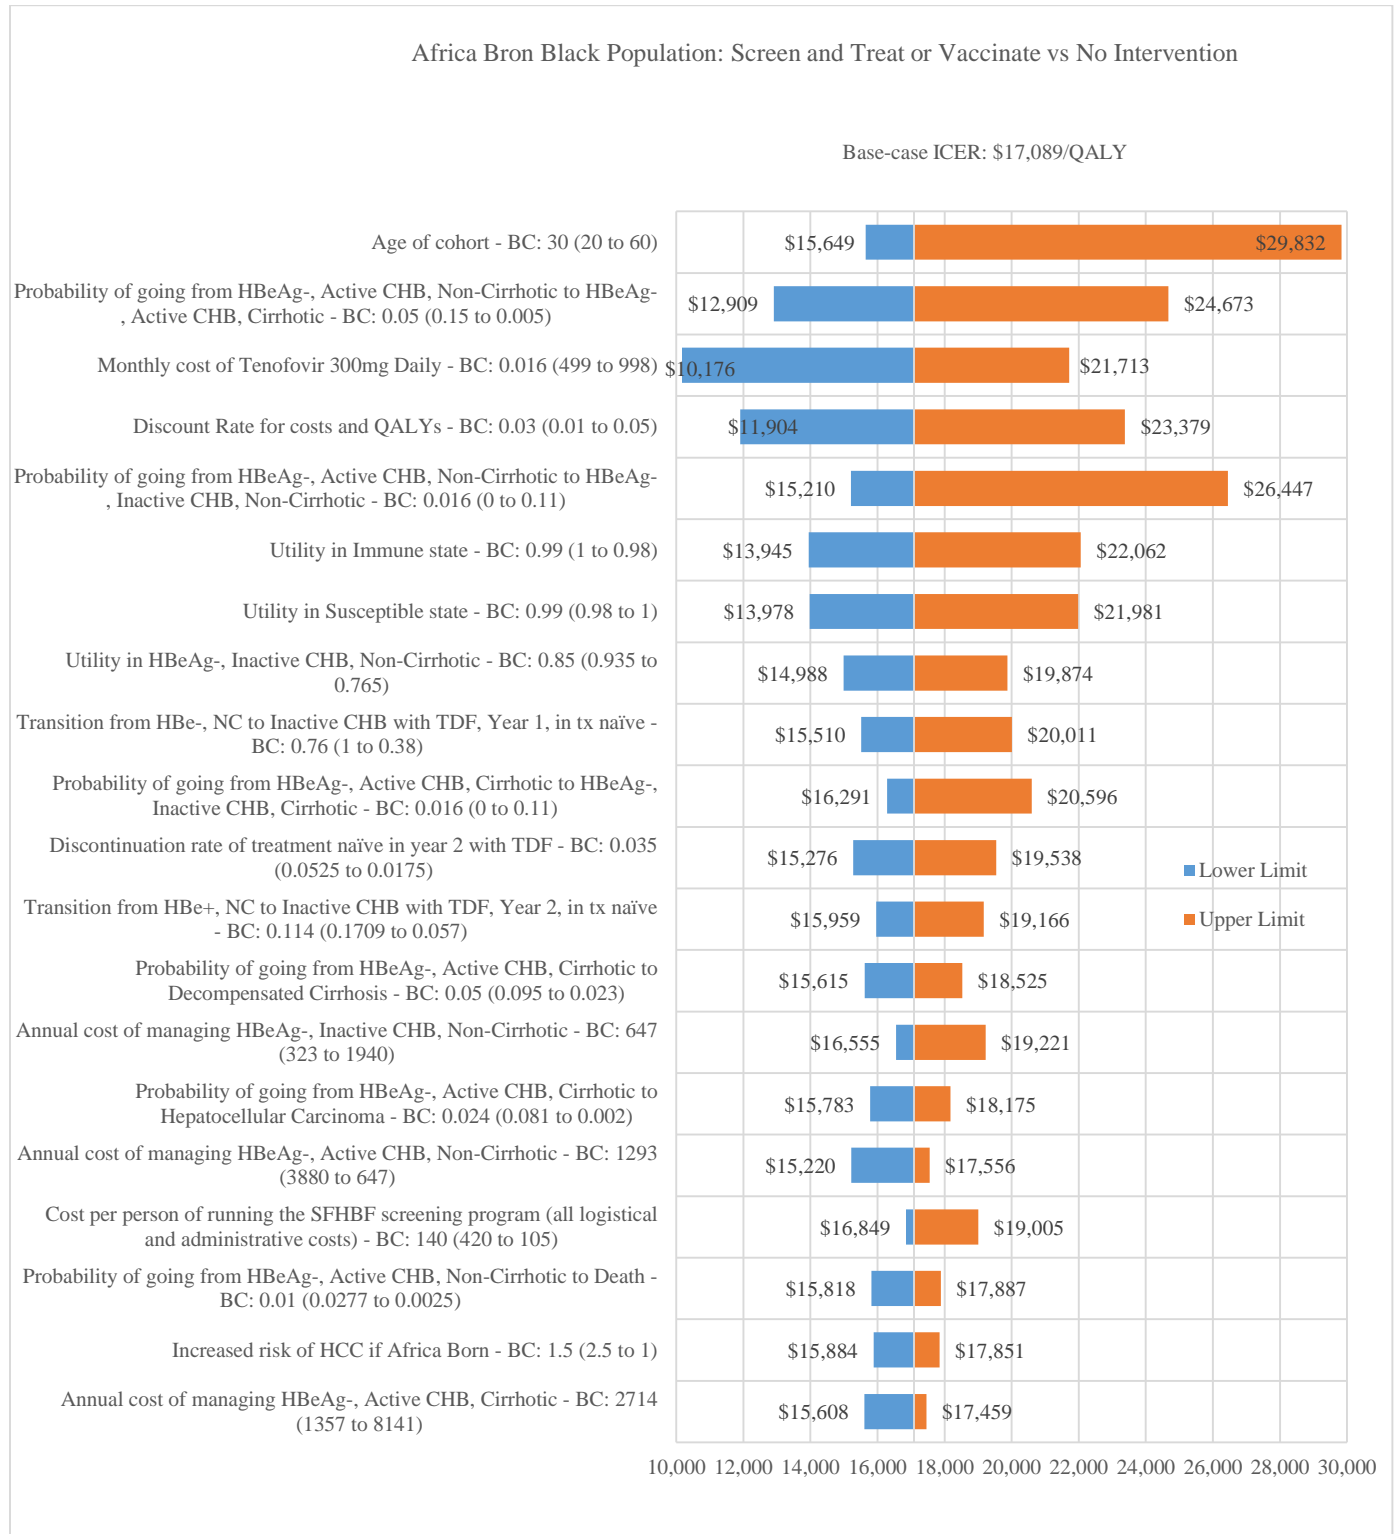

895

896

Figure S13: Sensitivity analysis for the inclusive strategy compared to no intervention for Africa Born Black Population

897

c. Incarcerated Persons

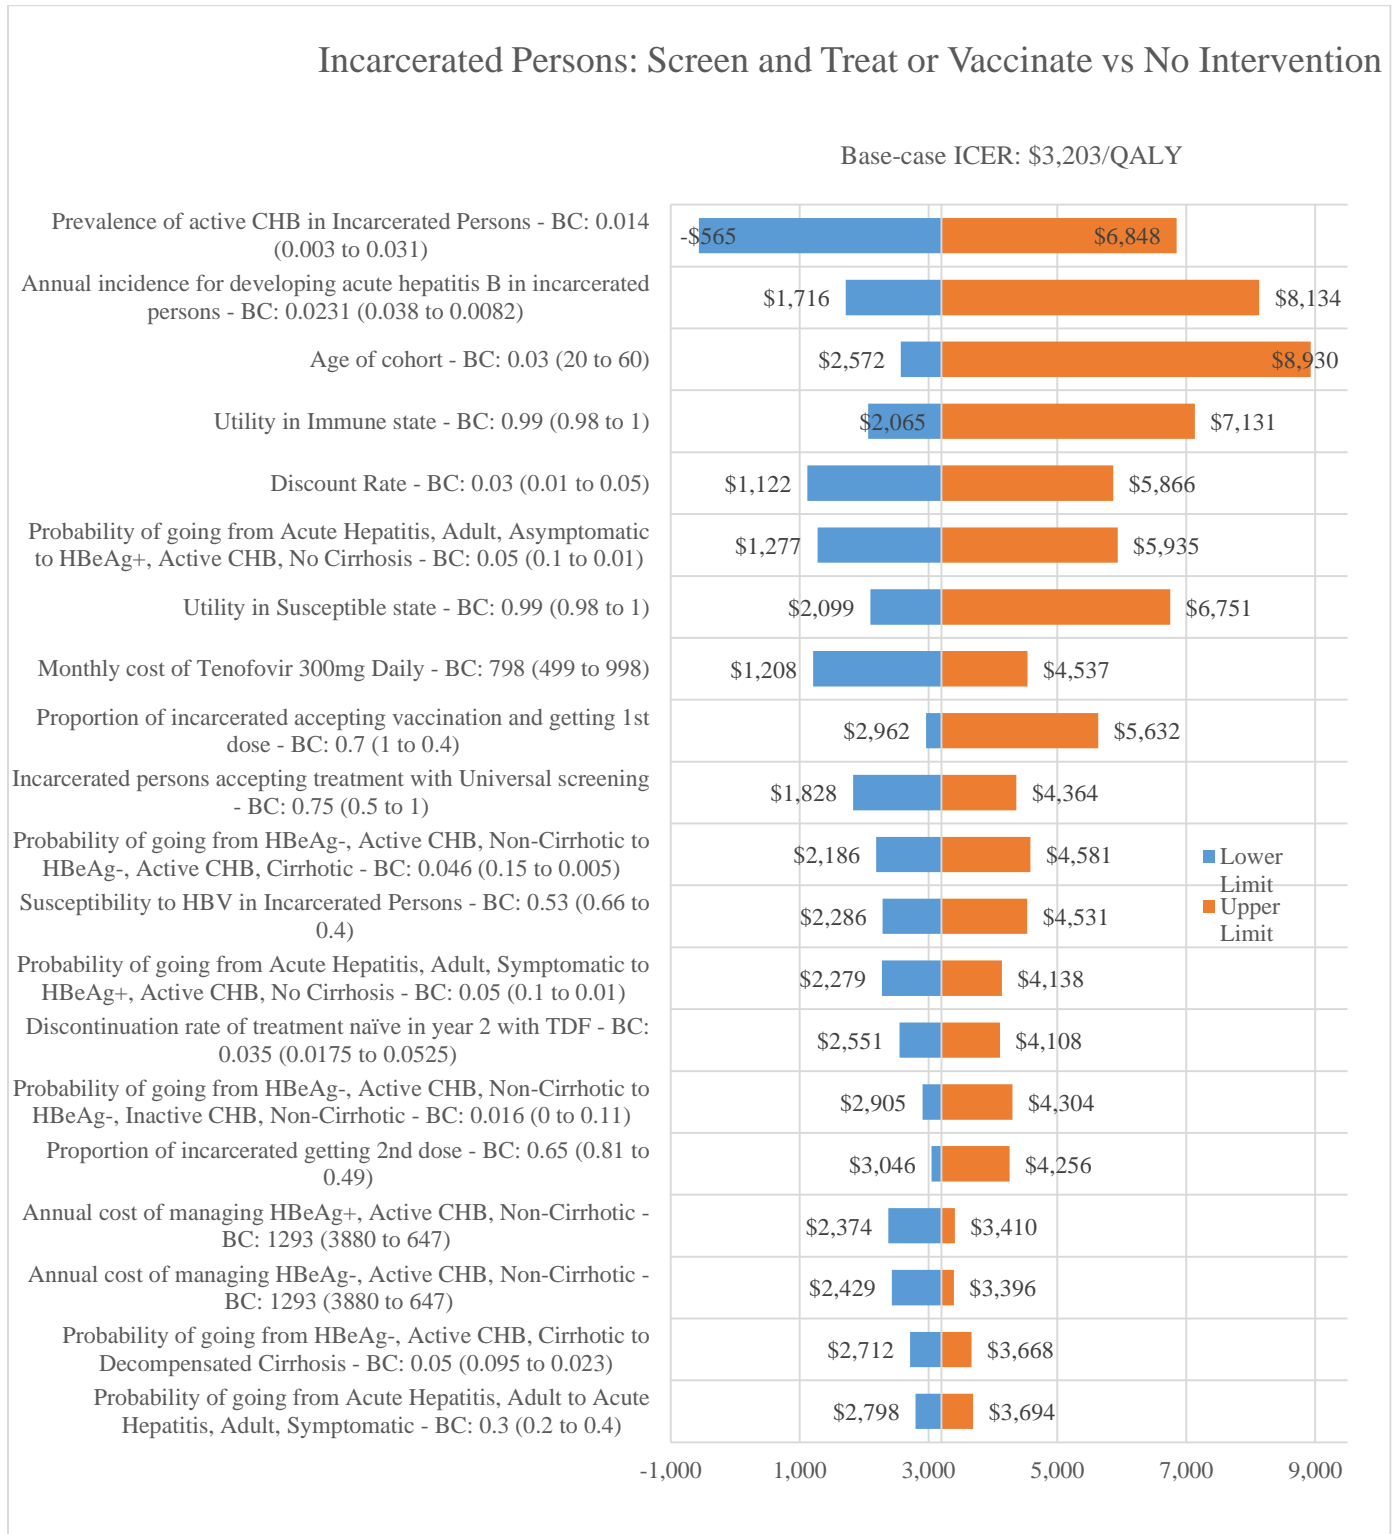

898

899 Figure S14: Sensitivity analysis for the inclusive strategy compared to no intervention for Incarcerated Individuals

900

d. Refugees

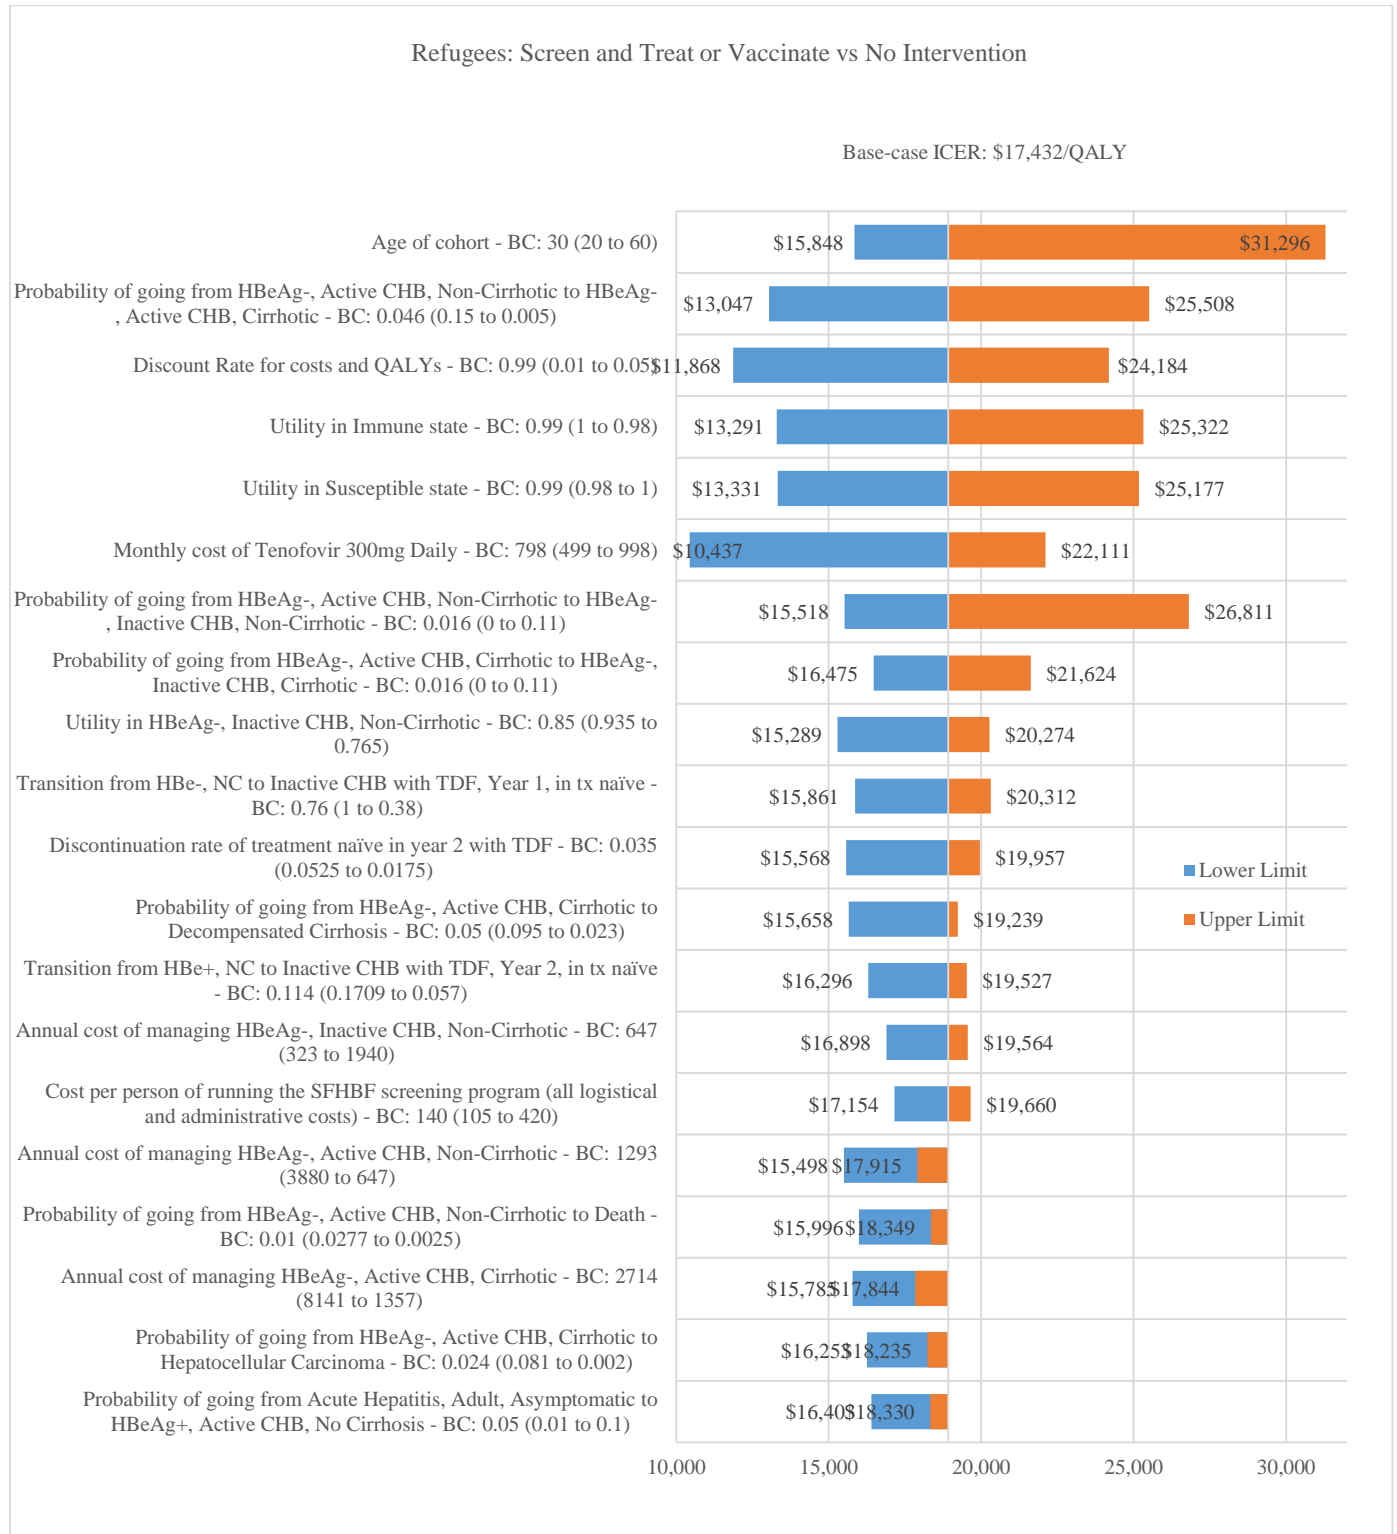

901

902 Figure S15: Sensitivity analysis for the inclusive strategy compared to no intervention for Refugees

903

e. People Who Inject Drugs

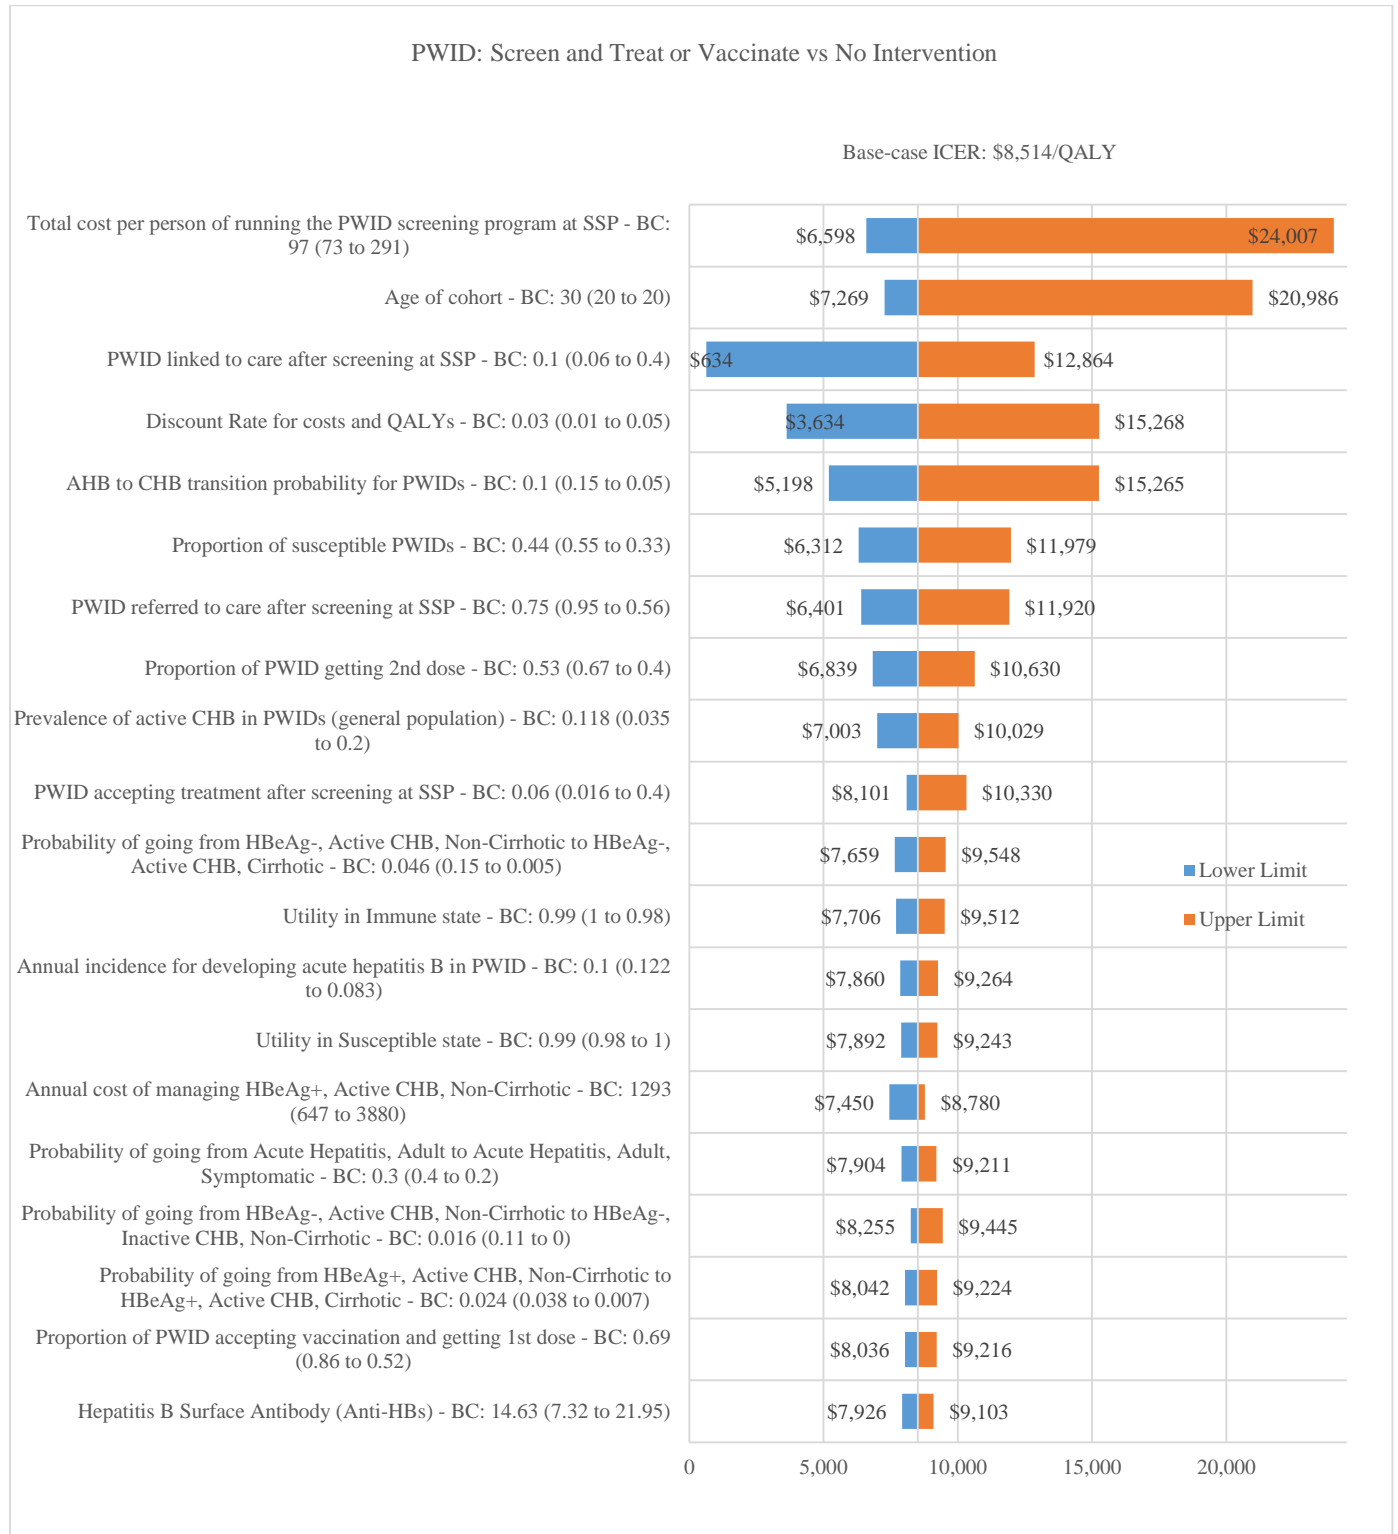

904

905

Figure S16: Sensitivity analysis for the inclusive strategy compared to no intervention for People Who Inject Drugs



f. Men Who Have Sex with Men

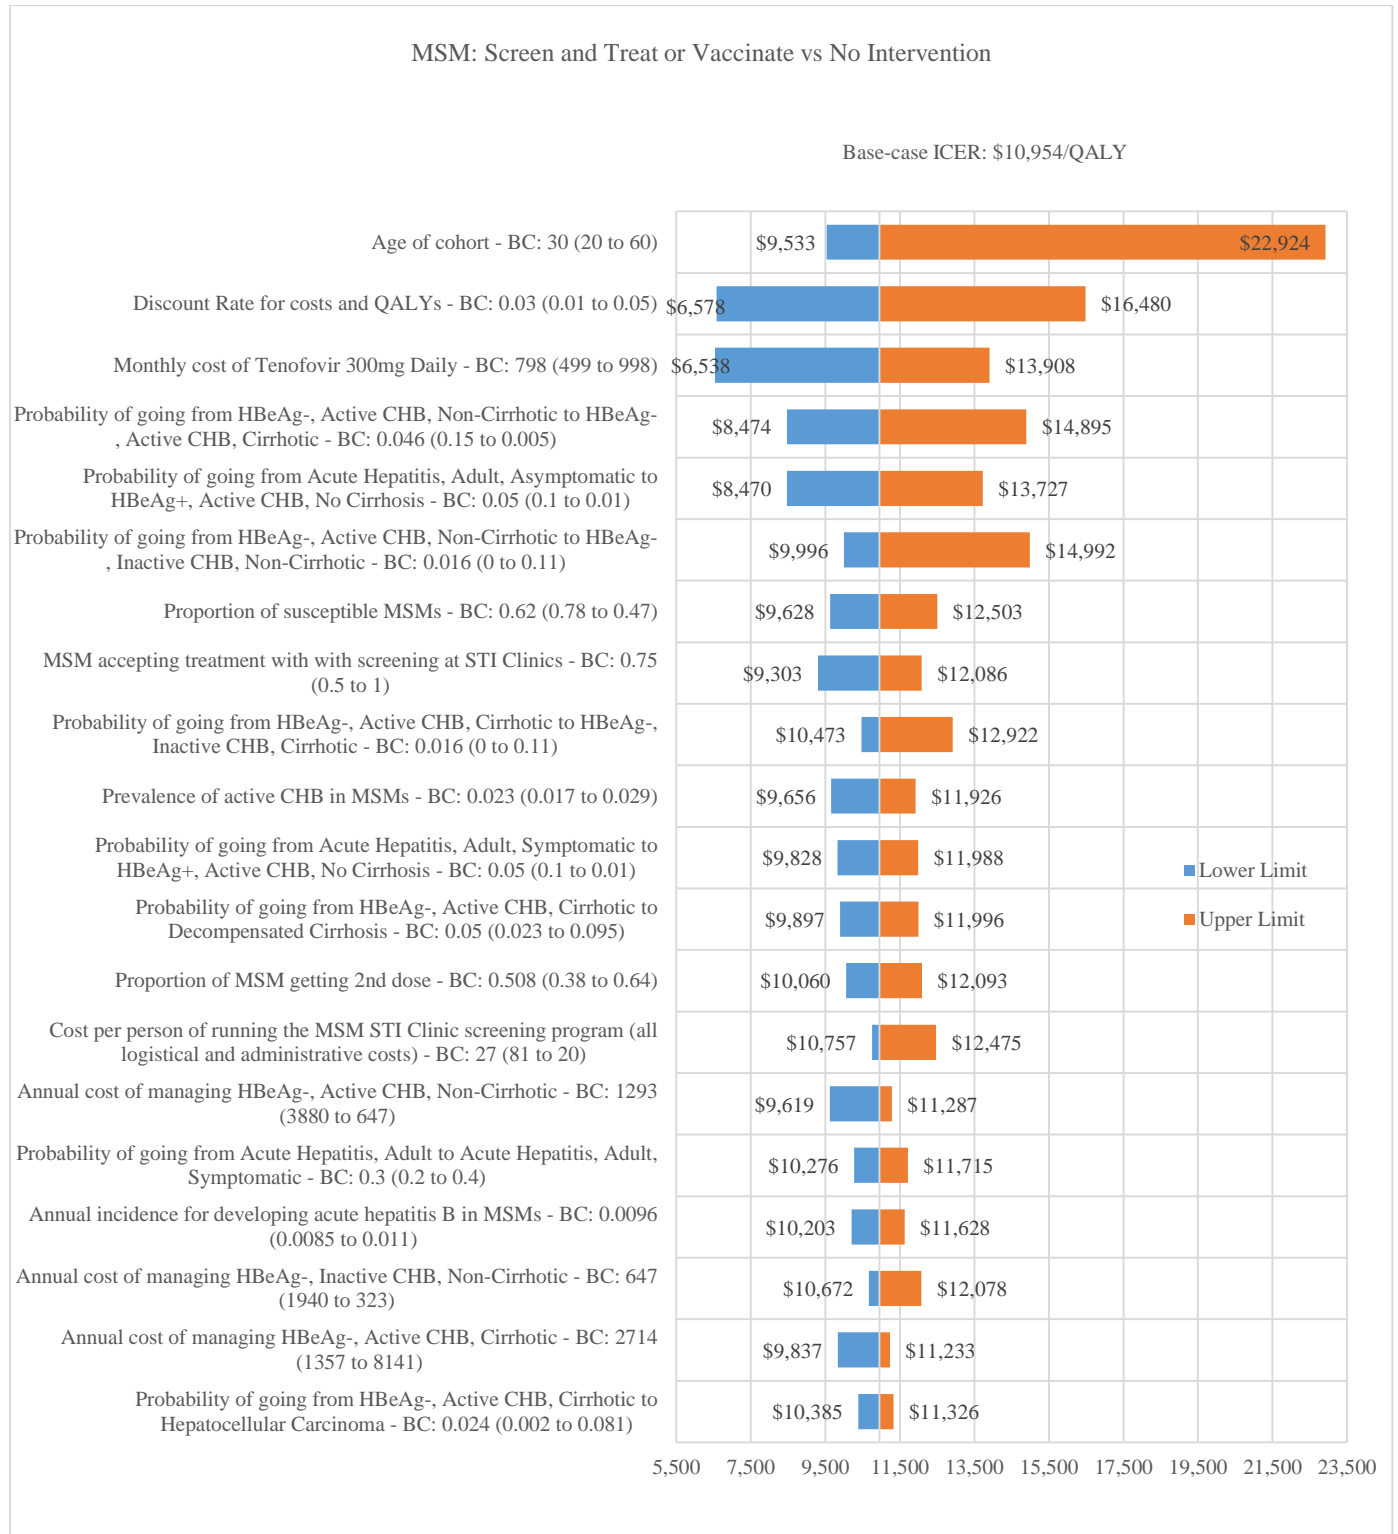

Figure S17: Sensitivity analysis for the inclusive strategy compared to no intervention for Men Who Sex with Men

909 **2. Effect of uncertainty around population-specific prevalence and incidence rates on ICER**

910 The table below shows the effect of uncertainty around population-specific prevalence and incidence on the  
 911 cost-effectiveness of the inclusive strategy when compared to no intervention.

912 The difference in ICER ranges listed in the table below show the maximum effect of the uncertainty for range for  
 913 each variable in a given population in cost-effectiveness ratios. A low difference in ICERs means that the ICERs  
 914 between the lower and the upper range of uncertainty were small, thus unlikely to effect the cost-effectiveness  
 915 of a given strategy. While a large difference in the ICER range shows a greater impact of the uncertainty around  
 916 that input on the cost-effectiveness ratios. The ICERs for incarcerated population, people who inject drugs, and  
 917 men who have sex with men were most sensitive to the uncertainty ranges. However, a finding of note in these  
 918 analyses was that across all uncertainty ranges, the ICERs remained below USD 50,000/QALY (or highly cost-  
 919 effective for the United States).

920 *Table S39: Effect of prevalence and incidence on cost-effectiveness of the inclusive strategy, by population*

| Population                  | Prevalence of hepatitis B |                                     | Incidence rate of hepatitis B |                                     |
|-----------------------------|---------------------------|-------------------------------------|-------------------------------|-------------------------------------|
|                             | Base-Case (Range)         | Difference in ICER Range (USD/QALY) | Base-Case (Range)             | Difference in ICER Range (USD/QALY) |
| Asian and Pacific Islanders | 0.079 (0.059 to 0.099)    | \$240                               | 0.0064 (0.0047 to 0.0081)     | \$951                               |
| Africa Born Blacks          | 0.097 (0.073 to 0.12)     | \$299                               | 0.0064 (0.0047 to 0.0081)     | \$849                               |
| Incarcerated Persons        | 0.014 (0.003 to 0.031)    | \$7,413                             | 0.0231 (0.0082 to 0.038)      | \$6,418                             |
| Refugees                    | 0.063 (0.0474 to 0.079)   | \$498                               | 0.0064 (0.0047 to 0.0081)     | \$1,164                             |
| People Who Inject Drugs     | 0.118 (0.035 to 0.2)      | \$3,026                             | 0.10 (0.083 to 0.122)         | \$1,404                             |
| Men Who Have Sex with Men   | 0.023 (0.017 to 0.029)    | \$2,270                             | 0.0096 (0.0085 to 0.011)      | \$1,425                             |

921

922

## VII. References

- 923 1. McMahon BJ. The natural history of chronic hepatitis B virus infection. *Hepatology*. 2009;49(5  
 924 Suppl):S45-55.
- 925 2. Tseng TC, Kao JH. Treating Immune-tolerant Hepatitis B. *J Viral Hepat*. 2015;22(2):77-84.
- 926 3. Tenney DJ, Rose RE, Baldick CJ, et al. Long-term monitoring shows hepatitis B virus resistance to  
 927 entecavir in nucleoside-naïve patients is rare through 5 years of therapy. *Hepatology*.  
 928 2009;49(5):1503-1514.
- 929 4. Fleurence RL, Hollenbeak CS. Rates and probabilities in economic modelling: transformation,  
 930 translation and appropriate application. *Pharmacoeconomics*. 2007;25(1):3-6.
- 931 5. Croagh CM, Bell SJ, Locarnini S, Desmond PV. Assessment of chronic hepatitis B: the importance  
 932 of hepatitis B virus DNA testing. *Intern Med J*. 2012;42(2):170-175.
- 933 6. Dakin H, Bentley A, Dusheiko G. Cost-utility analysis of tenofovir disoproxil fumarate in the  
 934 treatment of chronic hepatitis B. *Value Health*. 2010;13(8):922-933.
- 935 7. Eckman MH, Kaiser TE, Sherman KE. The cost-effectiveness of screening for chronic hepatitis B  
 936 infection in the United States. *Clin Infect Dis*. 2011;52(11):1294-1306.
- 937 8. Hoerger TJ, Schillie S, Wittenborn JS, et al. Cost-effectiveness of hepatitis B vaccination in adults  
 938 with diagnosed diabetes. *Diabetes Care*. 2013;36(1):63-69.
- 939 9. Jia Y, Li L, Cui F, et al. Cost-effectiveness analysis of a hepatitis B vaccination catch-up program  
 940 among children in Shandong Province, China. *Hum Vaccin Immunother*. 2014;10(10):2983-2991.
- 941 10. Kanwal F, Gralnek IM, Martin P, Dulai GS, Farid M, Spiegel BM. Treatment alternatives for chronic  
 942 hepatitis B virus infection: a cost-effectiveness analysis. *Ann Intern Med*. 2005;142(10):821-831.
- 943 11. Tilson L, Thornton L, O'Flanagan D, Johnson H, Barry M. Cost effectiveness of hepatitis B  
 944 vaccination strategies in Ireland: an economic evaluation. *Eur J Public Health*. 2008;18(3):275-  
 945 282.
- 946 12. Toy M, Hutton DW, So SK. Cost-Effectiveness and Cost Thresholds of Generic and Brand Drugs in  
 947 a National Chronic Hepatitis B Treatment Program in China. *PLoS One*. 2015;10(11):e0139876.
- 948 13. Hung HF, Chen HH. Cost-effectiveness analysis of prophylactic lamivudine use in preventing  
 949 vertical transmission of hepatitis B virus infection. *Pharmacoeconomics*. 2011;29(12):1063-1073.
- 950 14. Lu SQ, McGhee SM, Xie X, Cheng J, Fielding R. Economic evaluation of universal newborn  
 951 hepatitis B vaccination in China. *Vaccine*. 2013;31(14):1864-1869.
- 952 15. Rossi C, Schwartzman K, Oxlade O, Klein MB, Greenaway C. Hepatitis B screening and vaccination  
 953 strategies for newly arrived adult Canadian immigrants and refugees: a cost-effectiveness  
 954 analysis. *PLoS One*. 2013;8(10):e78548.
- 955 16. Kim SY, Billah K, Lieu TA, Weinstein MC. Cost effectiveness of hepatitis B vaccination at HIV  
 956 counseling and testing sites. *Am J Prev Med*. 2006;30(6):498-506.
- 957 17. Okada K, Kamiyama I, Inomata M, Imai M, Miyakawa Y. e antigen and anti-e in the serum of  
 958 asymptomatic carrier mothers as indicators of positive and negative transmission of hepatitis B  
 959 virus to their infants. *N Engl J Med*. 1976;294(14):746-749.
- 960 18. Beasley RP, Trepo C, Stevens CE, Szmuness W. The e antigen and vertical transmission of  
 961 hepatitis B surface antigen. *Am J Epidemiol*. 1977;105(2):94-98.
- 962 19. Stevens CE, Neurath RA, Beasley RP, Szmuness W. HBeAg and anti-HBe detection by  
 963 radioimmunoassay: correlation with vertical transmission of hepatitis B virus in Taiwan. *J Med*  
 964 *Viro*. 1979;3(3):237-241.

- 965 20. Reesink HW, Reesink-Brongers EE, Lafeber-Schut BJ, Kalshoven-Benschop J, Brummelhuis HG.  
 966 Prevention of chronic HBsAg carriership in infants of HBsAg-positive mothers by hepatitis B  
 967 immunoglobulin. *Acta Haematol Pol.* 1980;11(2):79-81.
- 968 21. Shiraki K, Yoshihara N, Sakurai M, Eto T, Kawana T. Acute hepatitis B in infants born to carrier  
 969 mother with the antibody to hepatitis B e antigen. *J Pediatr.* 1980;97(5):768-770.
- 970 22. Beasley RP, Hwang LY, Lee GC, et al. Prevention of perinatally transmitted hepatitis B virus  
 971 infections with hepatitis B immune globulin and hepatitis B vaccine. *Lancet.* 1983;2(8359):1099-  
 972 1102.
- 973 23. Goudeau A, Yvonnet B, Lesage G, et al. Lack of anti-HBc IgM in neonates with HBsAg carrier  
 974 mothers argues against transplacental transmission of hepatitis B virus infection. *Lancet.*  
 975 1983;2(8359):1103-1104.
- 976 24. Gussetti N, Pornaro E, Largajolli G, D'Elia R. Vertical transmission of HBV from mothers HBsAg  
 977 positive, anti-HBe positive. *Dev Biol Stand.* 1983;54:405-408.
- 978 25. Marinier E, Barrois V, Larouze B, et al. Lack of perinatal transmission of hepatitis B virus infection  
 979 in Senegal, West Africa. *J Pediatr.* 1985;106(5):843-849.
- 980 26. Xu ZY, Liu CB, Francis DP, et al. Prevention of perinatal acquisition of hepatitis B virus carriage  
 981 using vaccine: preliminary report of a randomized, double-blind placebo-controlled and  
 982 comparative trial. *Pediatrics.* 1985;76(5):713-718.
- 983 27. Nayak NC, Panda SK, Zuckerman AJ, Bhan MK, Guha DK. Dynamics and impact of perinatal  
 984 transmission of hepatitis B virus in North India. *J Med Virol.* 1987;21(2):137-145.
- 985 28. Hyams KC, Osman NM, Khaled EM, et al. Maternal-infant transmission of hepatitis B in Egypt. *J*  
 986 *Med Virol.* 1988;24(2):191-197.
- 987 29. Tsega E, Tsega M, Mengesha B, Nordenfelt E, Hansson BG, Lindberg J. Transmission of hepatitis B  
 988 virus infection in Ethiopia with emphasis on the importance of vertical transmission. *Int J*  
 989 *Epidemiol.* 1988;17(4):874-879.
- 990 30. Hann HW, Hann RS, Maddrey WC. Hepatitis B virus infection in 6,130 unvaccinated Korean-  
 991 Americans surveyed between 1988 and 1990. *Am J Gastroenterol.* 2007;102(4):767-772.
- 992 31. Lee SD, Lo KJ, Wu JC, et al. Prevention of maternal-infant hepatitis B virus transmission by  
 993 immunization: the role of serum hepatitis B virus DNA. *Hepatology.* 1986;6(3):369-373.
- 994 32. Bernuau J, Goudeau A, Poynard T, et al. Multivariate analysis of prognostic factors in fulminant  
 995 hepatitis B. *Hepatology.* 1986;6(4):648-651.
- 996 33. Lettau LA, McCarthy JG, Smith MH, et al. Outbreak of severe hepatitis due to delta and hepatitis  
 997 B viruses in parenteral drug abusers and their contacts. *N Engl J Med.* 1987;317(20):1256-1262.
- 998 34. Takahashi Y, Shimizu M. Aetiology and prognosis of fulminant viral hepatitis in Japan: a  
 999 multicentre study. The Study Group of Fulminant Hepatitis. *J Gastroenterol Hepatol.*  
 1000 1991;6(2):159-164.
- 1001 35. Acharya SK, Dasarathy S, Kumer TL, et al. Fulminant hepatitis in a tropical population: clinical  
 1002 course, cause, and early predictors of outcome. *Hepatology.* 1996;23(6):1448-1455.
- 1003 36. Ozasa A, Tanaka Y, Orito E, et al. Influence of genotypes and precore mutations on fulminant or  
 1004 chronic outcome of acute hepatitis B virus infection. *Hepatology.* 2006;44(2):326-334.
- 1005 37. Chen X, Fu C, Liu J, Shan L, Liu C. Recent epidemiological and clinical features of acute hepatitis B  
 1006 in a single center of China. *Int J Clin Exp Med.* 2015;8(9):16652-16657.
- 1007 38. Chu CM, Liaw YF. HBsAg seroclearance in asymptomatic carriers of high endemic areas:  
 1008 appreciably high rates during a long-term follow-up. *Hepatology.* 2007;45(5):1187-1192.

- 1009 39. Sampliner RE, Hamilton FA, Iseri OA, Tabor E, Boitnott J. The liver histology and frequency of  
1010 clearance of the hepatitis B surface antigen (HBsAg) in chronic carriers. *Am J Med Sci.*  
1011 1979;277(1):17-22.
- 1012 40. Alward WL, McMahon BJ, Hall DB, Heyward WL, Francis DP, Bender TR. The long-term serological  
1013 course of asymptomatic hepatitis B virus carriers and the development of primary hepatocellular  
1014 carcinoma. *J Infect Dis.* 1985;151(4):604-609.
- 1015 41. Liaw YF, Sheen IS, Chen TJ, Chu CM, Pao CC. Incidence, determinants and significance of delayed  
1016 clearance of serum HBsAg in chronic hepatitis B virus infection: a prospective study. *Hepatology.*  
1017 1991;13(4):627-631.
- 1018 42. Villeneuve JP, Desrochers M, Infante-Rivard C, et al. A long-term follow-up study of  
1019 asymptomatic hepatitis B surface antigen-positive carriers in Montreal. *Gastroenterology.*  
1020 1994;106(4):1000-1005.
- 1021 43. Da Silva LC, Madruga CL, Carrilho FJ, et al. Spontaneous hepatitis B surface antigen clearance in a  
1022 long-term follow-up study of patients with chronic type B hepatitis. Lack of correlation with  
1023 hepatitis C and D virus superinfection. *J Gastroenterol.* 1996;31(5):696-701.
- 1024 44. Fattovich G, Giustina G, Sanchez-Tapias J, et al. Delayed clearance of serum HBsAg in  
1025 compensated cirrhosis B: relation to interferon alpha therapy and disease prognosis. European  
1026 Concerted Action on Viral Hepatitis (EUROHEP). *Am J Gastroenterol.* 1998;93(6):896-900.
- 1027 45. Huo TI, Wu JC, Lee PC, et al. Sero-clearance of hepatitis B surface antigen in chronic carriers does  
1028 not necessarily imply a good prognosis. *Hepatology.* 1998;28(1):231-236.
- 1029 46. McMahon BJ, Holck P, Bulkow L, Snowball M. Serologic and clinical outcomes of 1536 Alaska  
1030 Natives chronically infected with hepatitis B virus. *Ann Intern Med.* 2001;135(9):759-768.
- 1031 47. Sanchez-Tapias JM, Costa J, Mas A, Bruguera M, Rodes J. Influence of hepatitis B virus genotype  
1032 on the long-term outcome of chronic hepatitis B in western patients. *Gastroenterology.*  
1033 2002;123(6):1848-1856.
- 1034 48. Manno M, Camma C, Schepis F, et al. Natural history of chronic HBV carriers in northern Italy:  
1035 morbidity and mortality after 30 years. *Gastroenterology.* 2004;127(3):756-763.
- 1036 49. Ahn SH, Park YN, Park JY, et al. Long-term clinical and histological outcomes in patients with  
1037 spontaneous hepatitis B surface antigen seroclearance. *J Hepatol.* 2005;42(2):188-194.
- 1038 50. Arase Y, Ikeda K, Suzuki F, et al. Long-term outcome after hepatitis B surface antigen  
1039 seroclearance in patients with chronic hepatitis B. *Am J Med.* 2006;119(1):71 e79-16.
- 1040 51. Yuen MF, Wong DK, Fung J, et al. HBsAg Seroclearance in chronic hepatitis B in Asian patients:  
1041 replicative level and risk of hepatocellular carcinoma. *Gastroenterology.* 2008;135(4):1192-1199.
- 1042 52. Simonetti J, Bulkow L, McMahon BJ, et al. Clearance of hepatitis B surface antigen and risk of  
1043 hepatocellular carcinoma in a cohort chronically infected with hepatitis B virus. *Hepatology.*  
1044 2010;51(5):1531-1537.
- 1045 53. Chen YC, Sheen IS, Chu CM, Liaw YF. Prognosis following spontaneous HBsAg seroclearance in  
1046 chronic hepatitis B patients with or without concurrent infection. *Gastroenterology.*  
1047 2002;123(4):1084-1089.
- 1048 54. Chu CM, Liaw YF. Incidence and risk factors of progression to cirrhosis in inactive carriers of  
1049 hepatitis B virus. *Am J Gastroenterol.* 2009;104(7):1693-1699.
- 1050 55. Yu MW, Hsu FC, Sheen IS, et al. Prospective study of hepatocellular carcinoma and liver cirrhosis  
1051 in asymptomatic chronic hepatitis B virus carriers. *Am J Epidemiol.* 1997;145(11):1039-1047.
- 1052 56. Kew MC. Epidemiology of hepatocellular carcinoma in sub-Saharan Africa. *Ann Hepatol.*  
1053 2013;12(2):173-182.

- 1054 57. Kirk GD, Lesi OA, Mendy M, et al. The Gambia Liver Cancer Study: Infection with hepatitis B and C  
1055 and the risk of hepatocellular carcinoma in West Africa. *Hepatology*. 2004;39(1):211-219.
- 1056 58. Kremsdorf D, Soussan P, Paterlini-Brechot P, Brechot C. Hepatitis B virus-related hepatocellular  
1057 carcinoma: paradigms for viral-related human carcinogenesis. *Oncogene*. 2006;25(27):3823-  
1058 3833.
- 1059 59. Ladep NG, Lesi OA, Mark P, et al. Problem of hepatocellular carcinoma in West Africa. *World J*  
1060 *Hepatol*. 2014;6(11):783-792.
- 1061 60. Mendy ME, Welzel T, Lesi OA, et al. Hepatitis B viral load and risk for liver cirrhosis and  
1062 hepatocellular carcinoma in The Gambia, West Africa. *J Viral Hepat*. 2010;17(2):115-122.
- 1063 61. Turner PC, Sylla A, Diallo MS, Castegnaro JJ, Hall AJ, Wild CP. The role of aflatoxins and hepatitis  
1064 viruses in the etiopathogenesis of hepatocellular carcinoma: A basis for primary prevention in  
1065 Guinea-Conakry, West Africa. *J Gastroenterol Hepatol*. 2002;17 Suppl:S441-448.
- 1066 62. Houdt Rv, Bruisten SM, Speksnijder AGCL, Prins M. Unexpectedly high proportion of drug users  
1067 and men having sex with men who develop chronic hepatitis B infection. *J Hepatol*.  
1068 2012;57(3):529-533.
- 1069 63. Mast EE, Weinbaum CM, Fiore AE, et al. A comprehensive immunization strategy to eliminate  
1070 transmission of hepatitis B virus infection in the United States: recommendations of the Advisory  
1071 Committee on Immunization Practices (ACIP) Part II: immunization of adults. *MMWR Recomm*  
1072 *Rep*. 2006;55(RR-16):1-33; quiz CE31-34.
- 1073 64. Razavi H, Elkhoury AC, Elbasha E, et al. Chronic hepatitis C virus (HCV) disease burden and cost in  
1074 the United States. *Hepatology*. 2013;57(6):2164-2170.
- 1075 65. Lok AS, McMahon BJ. Chronic hepatitis B. *Hepatology*. 2007;45(2):507-539.
- 1076 66. Shepard CW, Simard EP, Finelli L, Fiore AE, Bell BP. Hepatitis B virus infection: epidemiology and  
1077 vaccination. *Epidemiol Rev*. 2006;28:112-125.
- 1078 67. Chu CM, Hung SJ, Lin J, Tai DI, Liaw YF. Natural history of hepatitis B e antigen to antibody  
1079 seroconversion in patients with normal serum aminotransferase levels. *Am J Med*.  
1080 2004;116(12):829-834.
- 1081 68. Iloeje UH, Yang HI, Chen CJ. Natural history of chronic hepatitis B: what exactly has REVEAL  
1082 revealed? *Liver Int*. 2012;32(9):1333-1341.
- 1083 69. Chahal HS, Marseille EA, Tice JA, et al. Cost-effectiveness of Early Treatment of Hepatitis C Virus  
1084 Genotype 1 by Stage of Liver Fibrosis in a US Treatment-Naive Population. *JAMA Intern Med*.  
1085 2015:1-9.
- 1086 70. Bailey MB, Shiau R, Zola J, et al. San Francisco hep B free: a grassroots community coalition to  
1087 prevent hepatitis B and liver cancer. *J Community Health*. 2011;36(4):538-551.
- 1088 71. Kamarulzaman A, Reid SE, Schwitters A, et al. Prevention of transmission of HIV, hepatitis B virus,  
1089 hepatitis C virus, and tuberculosis in prisoners. *The Lancet*. 2016.
- 1090 72. Nelson PK, Mathers BM, Cowie B, et al. Global epidemiology of hepatitis B and hepatitis C in  
1091 people who inject drugs: results of systematic reviews. *Lancet*. 2011;378(9791):571-583.
- 1092 73. Weinbaum CM, Lyerla R, Mackellar DA, et al. The Young Men's Survey phase II: hepatitis B  
1093 immunization and infection among young men who have sex with men. *Am J Public Health*.  
1094 2008;98(5):839-845.
- 1095 74. Harris AM, Schoenbachler BT, Ramirez G, Vellozzi C, Beckett GA. Testing and Linking Foreign-  
1096 Born People with Chronic Hepatitis B Virus Infection to Care at Nine U.S. Programs, 2012-2014.  
1097 *Public Health Rep*. 2016;131 Suppl 2:20-28.

- 1098 75. Linde AC, Sweet KA, Nelson K, Mamo B, Chute SM. Impact of the Hepatitis Testing and Linkage to  
1099 Care (HepTLC) Initiative on Linkage to Care for Minnesota Refugees with Hepatitis B, 2012-2014.  
1100 *Public Health Rep.* 2016;131 Suppl 2:112-118.
- 1101 76. Rossi C, Shrier I, Marshall L, et al. Seroprevalence of Chronic Hepatitis B Virus Infection and Prior  
1102 Immunity in Immigrants and Refugees: A Systematic Review and Meta-Analysis. *PLoS One.*  
1103 2012;7(9):e44611.
- 1104 77. Weinbaum C, Lyerla R, Margolis HS. Prevention and control of infections with hepatitis viruses in  
1105 correctional settings. Centers for Disease Control and Prevention. *MMWR Recomm Rep.*  
1106 2003;52(Rr-1):1-36; quiz CE31-34.
- 1107 78. Weinbaum CM, Sabin KM, Santibanez SS. Hepatitis B, hepatitis C, and HIV in correctional  
1108 populations: a review of epidemiology and prevention. *AIDS.* 2005;19 Suppl 3:S41-46.
- 1109 79. Heimer R, Grau LE, Singer M, et al. Hepatitis B Virus Prevalence and Vaccination Rates among  
1110 Hispanic Injection Drug Users Participating in a Vaccination Campaign. *Journal of Drug Issues.*  
1111 2008;38(1):335-350.
- 1112 80. Scott KC, Taylor EM, Mamo B, et al. Hepatitis B screening and prevalence among resettled  
1113 refugees - United States, 2006-2011. *MMWR Morb Mortal Wkly Rep.* 2015;64(21):570-573.
- 1114 81. Huzly D, Schenk T, Jilg W, Neumann-Haefelin D. Comparison of nine commercially available  
1115 assays for quantification of antibody response to hepatitis B virus surface antigen. *J Clin*  
1116 *Microbiol.* 2008;46(4):1298-1306.
- 1117 82. Scheiblaue H, El-Nageh M, Diaz S, et al. Performance evaluation of 70 hepatitis B virus (HBV)  
1118 surface antigen (HBsAg) assays from around the world by a geographically diverse panel with an  
1119 array of HBV genotypes and HBsAg subtypes. *Vox Sang.* 2010;98(3 Pt 2):403-414.
- 1120 83. Popp C, Krams D, Beckert C, et al. HBsAg blood screening and diagnosis: performance evaluation  
1121 of the ARCHITECT HBsAg qualitative and ARCHITECT HBsAg qualitative confirmatory assays.  
1122 *Diagn Microbiol Infect Dis.* 2011;70(4):479-485.
- 1123 84. Chandrasekar E, Kaur R, Song S, Kim KE. A comparison of effectiveness of hepatitis B screening  
1124 and linkage to care among foreign-born populations in clinical and nonclinical settings. *J*  
1125 *Multidiscip Healthc.* 2015;8:1-9.
- 1126 85. Blackburn NA, Patel RC, Zibbell JE. Improving Screening Methods for Hepatitis C Among People  
1127 Who Inject Drugs: Findings from the HepTLC Initiative, 2012-2014. *Public Health Rep.* 2016;131  
1128 Suppl 2:91-97.
- 1129 86. Dang JHT, Chen MS. Increasing Hepatitis B Testing and Linkage to Care of Foreign-Born Asians,  
1130 Sacramento, California, 2012-2013. *Public Health Rep.* 2016;131 Suppl 2:119-124.
- 1131 87. Hebert AJ, Lamia TL, Schoenbachler BT, Richardson AK. Data Collection for Monitoring Hepatitis  
1132 Testing Programs: The HepTLC Data Management System. *Public Health Rep.* 2016;131 Suppl  
1133 2:41-43.
- 1134 88. Ramirez G, Cabral R, Patterson M, et al. Early Identification and Linkage to Care for People with  
1135 Chronic HBV and HCV Infection: The HepTLC Initiative. *Public Health Rep.* 2016;131 Suppl 2:5-11.
- 1136 89. Rein DB, Lesesne SB, Smith BD, Weinbaum CM. Models of community-based hepatitis B surface  
1137 antigen screening programs in the U.S. and their estimated outcomes and costs. *Public Health*  
1138 *Rep.* 2011;126(4):560-567.
- 1139 90. Ward JW. Strategies for Expanding Access to HBV and HCV Testing and Care in the United States:  
1140 The CDC Hepatitis Testing and Linkage to Care Initiative, 2012-2014. *Public Health Rep.* 2016;131  
1141 Suppl 2:1-4.

- 1142 91. Des Jarlais DC, Nugent A, Solberg A, Feelemyer J, Mermin J, Holtzman D. Syringe Service  
 1143 Programs for Persons Who Inject Drugs in Urban, Suburban, and Rural Areas - United States,  
 1144 2013. *MMWR Morb Mortal Wkly Rep.* 2015;64(48):1337-1341.
- 1145 92. Iversen J, Grebely J, Topp L, Wand H, Dore G, Maher L. Uptake of hepatitis C treatment among  
 1146 people who inject drugs attending Needle and Syringe Programs in Australia, 1999–2011. *J Viral*  
 1147 *Hepat.* 2014;21(3):198-207.
- 1148 93. Grebely J, Matthews GV, Lloyd AR, Dore GJ. Elimination of hepatitis C virus infection among  
 1149 people who inject drugs through treatment as prevention: feasibility and future requirements.  
 1150 *Clin Infect Dis.* 2013;57(7):1014-1020.
- 1151 94. Akyar E, Seneca KH, Akyar S, Schofield N, Schwartz MP, Nahass RG. Linkage to Care for Suburban  
 1152 Heroin Users with Hepatitis C Virus Infection, New Jersey, USA. *Emerg Infect Dis.* 2016;22(5):907-  
 1153 909.
- 1154 95. Sansom S, Rudy E, Strine T, Douglas W. Hepatitis A and B vaccination in a sexually transmitted  
 1155 disease clinic for men who have sex with men. *Sex Transm Dis.* 2003;30(9):685-688.
- 1156 96. Martin P, Lau DT, Nguyen MH, et al. A Treatment Algorithm for the Management of Chronic  
 1157 Hepatitis B Virus Infection in the United States: 2015 Update. *Clin Gastroenterol Hepatol.*  
 1158 2015;13(12):2071-2087 e2016.
- 1159 97. Terrault NA, Bzowej NH, Chang KM, Hwang JP, Jonas MM, Murad MH. AASLD guidelines for  
 1160 treatment of chronic hepatitis B. *Hepatology.* 2015.
- 1161 98. Batirel A, Guclu E, Arslan F, et al. Comparable efficacy of tenofovir versus entecavir and  
 1162 predictors of response in treatment-naive patients with chronic hepatitis B: a multicenter real-  
 1163 life study. *Int J Infect Dis.* 2014;28:153-159.
- 1164 99. Kim SS, Hwang JC, Lim SG, Ahn SJ, Cheong JY, Cho SW. Effect of virological response to entecavir  
 1165 on the development of hepatocellular carcinoma in hepatitis B viral cirrhotic patients:  
 1166 comparison between compensated and decompensated cirrhosis. *Am J Gastroenterol.*  
 1167 2014;109(8):1223-1233.
- 1168 100. Liaw YF. HBeAg seroconversion as an important end point in the treatment of chronic hepatitis B.  
 1169 *Hepatol Int.* 2009;3(3):425-433.
- 1170 101. Lin SM, Yu ML, Lee CM, et al. Interferon therapy in HBeAg positive chronic hepatitis reduces  
 1171 progression to cirrhosis and hepatocellular carcinoma. *J Hepatol.* 2007;46(1):45-52.
- 1172 102. Tseng TC, Liu CJ, Yang HC, et al. High levels of hepatitis B surface antigen increase risk of  
 1173 hepatocellular carcinoma in patients with low HBV load. *Gastroenterology.* 2012;142(5):1140-  
 1174 1149 e1143; quiz e1113-1144.
- 1175 103. Yang HI, Lu SN, Liaw YF, et al. Hepatitis B e antigen and the risk of hepatocellular carcinoma. *N*  
 1176 *Engl J Med.* 2002;347(3):168-174.
- 1177 104. You SL, Yang HI, Chen CJ. Seropositivity of hepatitis B e antigen and hepatocellular carcinoma.  
 1178 *Ann Med.* 2004;36(3):215-224.
- 1179 105. Tziomalos K. Effect of antiviral treatment on the risk of hepatocellular carcinoma in patients with  
 1180 chronic hepatitis B. *World J Hepatol.* 2010;2(3):91-93.
- 1181 106. Vlachogiannakos J, Papatheodoridis GV. Optimal therapy of chronic hepatitis B: how do I treat  
 1182 HBeAg-positive patients? *Liver Int.* 2015;35 Suppl 1:100-106.
- 1183 107. Marcellin P, Heathcote EJ, Buti M, et al. Tenofovir disoproxil fumarate versus adefovir dipivoxil  
 1184 for chronic hepatitis B. *N Engl J Med.* 2008;359(23):2442-2455.
- 1185 108. Liaw YF, Sung JJ, Chow WC, et al. Lamivudine for patients with chronic hepatitis B and advanced  
 1186 liver disease. *N Engl J Med.* 2004;351(15):1521-1531.



- 1187 109. Buti M, Fung S, Gane E, et al. Long-term clinical outcomes in cirrhotic chronic hepatitis B patients  
 1188 treated with tenofovir disoproxil fumarate for up to 5 years. *Hepatol Int.* 2015;9(2):243-250.
- 1189 110. Wang HM, Hung CH, Lee CM, et al. Three-year efficacy and safety of tenofovir in nucleos(t)ide  
 1190 analog-naïve and -experienced chronic hepatitis B patients. *J Gastroenterol Hepatol.* 2016.
- 1191 111. Chang TT, Lai CL, Kew Yoon S, et al. Entecavir treatment for up to 5 years in patients with  
 1192 hepatitis B e antigen-positive chronic hepatitis B. *Hepatology.* 2010;51(2):422-430.
- 1193 112. Gish RG, Chang TT, Lai CL, et al. Loss of HBsAg antigen during treatment with entecavir or  
 1194 lamivudine in nucleoside-naïve HBeAg-positive patients with chronic hepatitis B. *J Viral Hepat.*  
 1195 2010;17(1):16-22.
- 1196 113. Pan CQ, Tong M, Kowdley KV, et al. High rates of viral suppression after long-term entecavir  
 1197 treatment of Asian patients with hepatitis B e antigen-positive chronic hepatitis B. *Clin*  
 1198 *Gastroenterol Hepatol.* 2012;10(9):1047-1050 e1041.
- 1199 114. Schiff ER, Lee SS, Chao YC, et al. Long-term treatment with entecavir induces reversal of  
 1200 advanced fibrosis or cirrhosis in patients with chronic hepatitis B. *Clin Gastroenterol Hepatol.*  
 1201 2011;9(3):274-276.
- 1202 115. Yokosuka O, Takaguchi K, Fujioka S, et al. Long-term use of entecavir in nucleoside-naïve  
 1203 Japanese patients with chronic hepatitis B infection. *J Hepatol.* 2010;52(6):791-799.
- 1204 116. Yuen MF, Seto WK, Fung J, Wong DK, Yuen JC, Lai CL. Three years of continuous entecavir  
 1205 therapy in treatment-naïve chronic hepatitis B patients: VIRAL suppression, viral resistance, and  
 1206 clinical safety. *Am J Gastroenterol.* 2011;106(7):1264-1271.
- 1207 117. Buti M, Tsai N, Petersen J, et al. Seven-year efficacy and safety of treatment with tenofovir  
 1208 disoproxil fumarate for chronic hepatitis B virus infection. *Dig Dis Sci.* 2015;60(5):1457-1464.
- 1209 118. Jonas MM, Chang MH, Sokal E, et al. Randomized, controlled trial of entecavir versus placebo in  
 1210 children with hepatitis B envelope antigen-positive chronic hepatitis B. *Hepatology.* 2015.
- 1211 119. Lai CL, Shouval D, Lok AS, et al. Entecavir versus lamivudine for patients with HBeAg-negative  
 1212 chronic hepatitis B. *N Engl J Med.* 2006;354(10):1011-1020.
- 1213 120. Chang TT, Gish RG, de Man R, et al. A comparison of entecavir and lamivudine for HBeAg-positive  
 1214 chronic hepatitis B. *N Engl J Med.* 2006;354(10):1001-1010.
- 1215 121. Zoulim F, Locarnini S. Hepatitis B virus resistance to nucleos(t)ide analogues. *Gastroenterology.*  
 1216 2009;137(5):1593-1608 e1591-1592.
- 1217 122. Baran B, Soyer OM, Ormeci AC, et al. Efficacy of tenofovir in patients with Lamivudine failure is  
 1218 not different from that in nucleoside/nucleotide analogue-naïve patients with chronic hepatitis  
 1219 B. *Antimicrob Agents Chemother.* 2013;57(4):1790-1796.
- 1220 123. Colonna RJ, Rose R, Baldick CJ, et al. Entecavir resistance is rare in nucleoside naïve patients with  
 1221 hepatitis B. *Hepatology.* 2006;44(6):1656-1665.
- 1222 124. Kitrinos KM, Corsa A, Liu Y, et al. No detectable resistance to tenofovir disoproxil fumarate after  
 1223 6 years of therapy in patients with chronic hepatitis B. *Hepatology.* 2014;59(2):434-442.
- 1224 125. Tenney DJ, Rose RE, Baldick CJ, et al. Two-year assessment of entecavir resistance in Lamivudine-  
 1225 refractory hepatitis B virus patients reveals different clinical outcomes depending on the  
 1226 resistance substitutions present. *Antimicrob Agents Chemother.* 2007;51(3):902-911.
- 1227 126. Koklu S, Tuna Y, Gulsen MT, et al. Long-term efficacy and safety of lamivudine, entecavir, and  
 1228 tenofovir for treatment of hepatitis B virus-related cirrhosis. *Clin Gastroenterol Hepatol.*  
 1229 2013;11(1):88-94.
- 1230 127. Snow-Lampart A, Chappell B, Curtis M, et al. No resistance to tenofovir disoproxil fumarate  
 1231 detected after up to 144 weeks of therapy in patients monoinfected with chronic hepatitis B  
 1232 virus. *Hepatology.* 2011;53(3):763-773.

- 1233 128. Chen CJ, Yang HI. Natural history of chronic hepatitis B REVEALed. *J Gastroenterol Hepatol.*  
 1234 2011;26(4):628-638.
- 1235 129. Chen CJ, Yang HI, Su J, et al. Risk of hepatocellular carcinoma across a biological gradient of  
 1236 serum hepatitis B virus DNA level. *JAMA.* 2006;295(1):65-73.
- 1237 130. Chen JD, Yang HI, Iloeje UH, et al. Carriers of inactive hepatitis B virus are still at risk for  
 1238 hepatocellular carcinoma and liver-related death. *Gastroenterology.* 2010;138(5):1747-1754.
- 1239 131. Iloeje UH, Yang HI, Su J, et al. Predicting cirrhosis risk based on the level of circulating hepatitis B  
 1240 viral load. *Gastroenterology.* 2006;130(3):678-686.
- 1241 132. Chang TT, Liaw YF, Wu SS, et al. Long-term entecavir therapy results in the reversal of  
 1242 fibrosis/cirrhosis and continued histological improvement in patients with chronic hepatitis B.  
 1243 *Hepatology.* 2010;52(3):886-893.
- 1244 133. Marcellin P, Gane E, Buti M, et al. Regression of cirrhosis during treatment with tenofovir  
 1245 disoproxil fumarate for chronic hepatitis B: a 5-year open-label follow-up study. *Lancet.*  
 1246 2013;381(9865):468-475.
- 1247 134. Hutton DW, Tan D, So SK, Brandeau ML. Cost-effectiveness of screening and vaccinating Asian  
 1248 and Pacific Islander adults for hepatitis B. *Ann Intern Med.* 2007;147(7):460-469.
- 1249 135. Des Jarlais DC, Diaz T, Perlis T, et al. Variability in the incidence of human immunodeficiency  
 1250 virus, hepatitis B virus, and hepatitis C virus infection among young injecting drug users in New  
 1251 York City. *Am J Epidemiol.* 2003;157(5):467-471.
- 1252 136. Hagan H, Snyder N, Hough E, et al. Case-reporting of acute hepatitis B and C among injection  
 1253 drug users. *J Urban Health.* 2002;79(4):579-585.
- 1254 137. Falade-Nwulia O, Seaberg EC, Snider AE, et al. Incident Hepatitis B Virus Infection in HIV-Infected  
 1255 and HIV-Uninfected Men Who Have Sex With Men From Pre-HAART to HAART Periods: A Cohort  
 1256 Study. *Ann Intern Med.* 2015;163(9):673-680.
- 1257 138. European Consensus Group on Hepatitis B Immunity. Are booster immunisations needed for  
 1258 lifelong hepatitis B immunity? . *Lancet.* 2000;355(9203):561-565.
- 1259 139. Yuen MF, Lim WL, Chan AO, Wong DK, Sum SS, Lai CL. 18-year follow-up study of a prospective  
 1260 randomized trial of hepatitis B vaccinations without booster doses in children. *Clin Gastroenterol*  
 1261 *Hepatol.* 2004;2(10):941-945.
- 1262 140. Kuan RK, Janssen R, Heyward W, Bennett S, Nordyke R. Cost-effectiveness of hepatitis B  
 1263 vaccination using HEPLISAV in selected adult populations compared to Engerix-B(R) vaccine.  
 1264 *Vaccine.* 2013;31(37):4024-4032.
- 1265 141. Levy AR, Kowdley KV, Iloeje U, et al. The impact of chronic hepatitis B on quality of life: a  
 1266 multinational study of utilities from infected and uninfected persons. *Value Health.*  
 1267 2008;11(3):527-538.
- 1268 142. Pereira A, Sanz C. A model of the health and economic impact of posttransfusion hepatitis C:  
 1269 application to cost-effectiveness analysis of further expansion of HCV screening protocols.  
 1270 *Transfusion (Paris).* 2000;40(10):1182-1191.
- 1271 143. Sullivan PW, Ghushchyan V. Preference-Based EQ-5D index scores for chronic conditions in the  
 1272 United States. *Med Decis Making.* 2006;26(4):410-420.
- 1273 144. Thein HH, Krahn M, Kaldor JM, Dore GJ. Estimation of utilities for chronic hepatitis C from SF-36  
 1274 scores. *Am J Gastroenterol.* 2005;100(3):643-651.
- 1275 145. Tu HAT, de Vries R, Woerdenbag HJ, et al. Cost-Effectiveness Analysis of Hepatitis B  
 1276 Immunization in Vietnam: Application of Cost-Effectiveness Affordability Curves in Health Care  
 1277 Decision Making. *Value in Health Regional Issues.* 2012;1(1):7-14.

- 1278 146. Wong JB, Koff RS, Tine F, Pauker SG. Cost-effectiveness of interferon-alpha 2b treatment for  
 1279 hepatitis B e antigen-positive chronic hepatitis B. *Ann Intern Med.* 1995;122(9):664-675.  
 1280 147. Woo G, Tomlinson G, Yim C, et al. Health state utilities and quality of life in patients with  
 1281 hepatitis B. *Can J Gastroenterol.* 2012;26(7):445-451.  
 1282 148. Wu B, Li T, Chen H, Shen J. Cost-effectiveness of nucleoside analog therapy for hepatitis B in  
 1283 China: a Markov analysis. *Value Health.* 2010;13(5):592-600.  
 1284 149. Gish RG, Lok AS, Chang TT, et al. Entecavir therapy for up to 96 weeks in patients with HBeAg-  
 1285 positive chronic hepatitis B. *Gastroenterology.* 2007;133(5):1437-1444.  
 1286 150. Butler JR, Pianko S, Korda RJ, et al. The direct cost of managing patients with chronic hepatitis B  
 1287 infection in Australia. *J Clin Gastroenterol.* 2004;38(10 Suppl 3):S187-192.  
 1288 151. Enriquez AD, Campbell MS, Reddy KR. Cost-effectiveness of suppressing hepatitis B virus DNA in  
 1289 immune tolerant patients to prevent hepatocellular carcinoma and cirrhosis. *Aliment Pharmacol*  
 1290 *Ther.* 2007;26(3):383-391.  
 1291 152. Lee TA, Veenstra DL, Iloeje UH, Sullivan SD. Cost of chronic hepatitis B infection in the United  
 1292 States. *J Clin Gastroenterol.* 2004;38(10 Suppl 3):S144-147.  
 1293 153. Miriti MK, Billah K, Weinbaum C, et al. Economic benefits of hepatitis B vaccination at sexually  
 1294 transmitted disease clinics in the U.S. *Public Health Rep.* 2008;123(4):504-513.  
 1295 154. Centers for Medicare and Medicaid Services. 2016 Clinical Laboratory Fee Schedule. 2016;  
 1296 <https://www.cms.gov/apps/ama/license.asp?file=/ClinicalLabFeeSched/Downloads/16CLAB.zip>.  
 1297 Accessed February 16th, 2016.  
 1298 155. Centers for Medicare and Medicaid Services. 2016 Physician Fee Schedule. 2016;  
 1299 <https://www.cms.gov/apps/physician-fee-schedule/search/search-criteria.aspx>. Accessed  
 1300 February 16th, 2016.  
 1301 156. Micromedex. Red Book Online. 2016. Accessed February 16th, 2016.  
 1302 157. CBO. *Prices for Brand-Name Drugs Under Selected Federal Programs.* The Congress of the United  
 1303 States; Congressional Budget Office;2005.  
 1304 158. Gao X, Stephens JM, Carter JA, Haider S, Rustgi VK. Impact of adverse events on costs and quality  
 1305 of life in protease inhibitor-based combination therapy for hepatitis C. *Expert Rev Pharmacoecon*  
 1306 *Outcomes Res.* 2012;12(3):335-343.  
 1307 159. Post SE, Sodhi NK, Peng CH, Wan K, Pollack HJ. A simulation shows that early treatment of  
 1308 chronic hepatitis B infection can cut deaths and be cost-effective. *Health Aff (Millwood).*  
 1309 2011;30(2):340-348.  
 1310 160. Fernández-Rodríguez CM, Gutiérrez-García ML. Prevention of hepatocellular carcinoma in  
 1311 patients with chronic hepatitis B. *World J Gastrointest Pharmacol Ther.* 2014;5(3):175-182.  
 1312 161. Kim WR, Loomba R, Berg T, et al. Impact of long-term tenofovir disoproxil fumarate on incidence  
 1313 of hepatocellular carcinoma in patients with chronic hepatitis B. *Cancer.* 2015;121(20):3631-  
 1314 3638.  
 1315 162. Lai CL, Yuen MF. Prevention of hepatitis B virus-related hepatocellular carcinoma with antiviral  
 1316 therapy. *Hepatology.* 2013;57(1):399-408.  
 1317 163. Papatheodoridis GV, Chan HL-Y, Hansen BE, Janssen HLA, Lampertico P. Risk of hepatocellular  
 1318 carcinoma in chronic hepatitis B: Assessment and modification with current antiviral therapy. *J*  
 1319 *Hepatol.* 2015;62(4):956-967.  
 1320 164. Papatheodoridis GV, Lampertico P, Manolakopoulos S, Lok A. Incidence of hepatocellular  
 1321 carcinoma in chronic hepatitis B patients receiving nucleos(t)ide therapy: a systematic review. *J*  
 1322 *Hepatol.* 2010;53(2):348-356.

- 1323 165. Sung JJ, Tsoi KK, Wong VW, Li KC, Chan HL. Meta-analysis: Treatment of hepatitis B infection  
1324 reduces risk of hepatocellular carcinoma. *Aliment Pharmacol Ther.* 2008;28(9):1067-1077.  
1325 166. Thiele M, Glud LL, Dahl EK, Krag A. Antiviral therapy for prevention of hepatocellular carcinoma  
1326 and mortality in chronic hepatitis B: systematic review and meta-analysis. *BMJ Open.* 2013;3(8).  
1327 167. Hosaka T, Suzuki F, Kobayashi M, et al. Long-term entecavir treatment reduces hepatocellular  
1328 carcinoma incidence in patients with hepatitis B virus infection. *Hepatology.* 2013;58(1):98-107.  
1329 168. Zhang YQ, Peng LJ, Cao YR, et al. Risk Factors for Hepatocellular Carcinoma in Cirrhotic Patients  
1330 with Chronic Hepatitis B. *Genet Test Mol Biomarkers.* 2016.
